# Supplementary material for: Lactate-induced H3K4me3 histone mark promotes PLOD1-driven prostate cancer invasion
Source: Research Square preprint supplement (doi:10.21203/rs.3.rs-7767481/v1), 2026-02-19
Supplement: Supplementary file 1 [file bde2d5d8572f0d95cb470e28.xlsx]

## Sheet: Sheet1
	Cluster	Ensembl	Symbol
1	E	ENSG00000003249	DBNDD1
2	E	ENSG00000004399	PLXND1
3	E	ENSG00000005189	REXO5
4	E	ENSG00000005448	WDR54
5	E	ENSG00000005882	PDK2
6	E	ENSG00000006071	ABCC8
7	E	ENSG00000006282	SPATA20
8	E	ENSG00000007237	GAS7
9	E	ENSG00000007255	TRAPPC6A
10	E	ENSG00000007402	CACNA2D2
11	E	ENSG00000008323	PLEKHG6
12	E	ENSG00000008382	MPND
13	E	ENSG00000010319	SEMA3G
14	E	ENSG00000010810	FYN
15	E	ENSG00000011028	MRC2
16	E	ENSG00000011478	QPCTL
17	E	ENSG00000012174	MBTPS2
18	E	ENSG00000012232	EXTL3
19	E	ENSG00000013364	MVP
20	E	ENSG00000013588	GPRC5A
21	E	ENSG00000015532	XYLT2
22	E	ENSG00000018236	CNTN1
23	E	ENSG00000019505	SYT13
24	E	ENSG00000020181	ADGRA2
25	E	ENSG00000021300	PLEKHB1
26	E	ENSG00000022267	FHL1
27	E	ENSG00000023318	ERP44
28	E	ENSG00000025708	TYMP
29	E	ENSG00000026103	FAS
30	E	ENSG00000026297	RNASET2
31	E	ENSG00000027847	B4GALT7
32	E	ENSG00000033867	SLC4A7
33	E	ENSG00000035862	TIMP2
34	E	ENSG00000039068	CDH1
35	E	ENSG00000041880	PARP3
36	E	ENSG00000042493	CAPG
37	E	ENSG00000044090	CUL7
38	E	ENSG00000044574	HSPA5
39	E	ENSG00000046604	DSG2
40	E	ENSG00000048740	CELF2
41	E	ENSG00000049239	H6PD
42	E	ENSG00000049246	PER3
43	E	ENSG00000050344	NFE2L3
44	E	ENSG00000050438	SLC4A8
45	E	ENSG00000050555	LAMC3
46	E	ENSG00000051108	HERPUD1
47	E	ENSG00000051523	CYBA
48	E	ENSG00000053918	KCNQ1
49	E	ENSG00000054179	ENTPD2
50	E	ENSG00000054793	ATP9A
51	E	ENSG00000055118	KCNH2
52	E	ENSG00000055147	FAM114A2
53	E	ENSG00000059804	SLC2A3
54	E	ENSG00000060656	PTPRU
55	E	ENSG00000061656	SPAG4
56	E	ENSG00000062038	CDH3
57	E	ENSG00000063046	EIF4B
58	E	ENSG00000063177	RPL18
59	E	ENSG00000064042	LIMCH1
60	E	ENSG00000064205	CCN5
61	E	ENSG00000064300	NGFR
62	E	ENSG00000064309	CDON
63	E	ENSG00000064666	CNN2
64	E	ENSG00000064961	HMG20B
65	E	ENSG00000065320	NTN1
66	E	ENSG00000065485	PDIA5
67	E	ENSG00000065534	MYLK
68	E	ENSG00000067221	STOML1
69	E	ENSG00000067798	NAV3
70	E	ENSG00000067992	PDK3
71	E	ENSG00000068078	FGFR3
72	E	ENSG00000068784	SRBD1
73	E	ENSG00000069188	SDK2
74	E	ENSG00000069667	RORA
75	E	ENSG00000070081	NUCB2
76	E	ENSG00000070214	SLC44A1
77	E	ENSG00000070540	WIPI1
78	E	ENSG00000071537	SEL1L
79	E	ENSG00000072682	P4HA2
80	E	ENSG00000072778	ACADVL
81	E	ENSG00000073849	ST6GAL1
82	E	ENSG00000074181	NOTCH3
83	E	ENSG00000074319	TSG101
84	E	ENSG00000074370	ATP2A3
85	E	ENSG00000074410	CA12
86	E	ENSG00000074416	MGLL
87	E	ENSG00000074621	SLC24A1
88	E	ENSG00000074695	LMAN1
89	E	ENSG00000074842	MYDGF
90	E	ENSG00000075043	KCNQ2
91	E	ENSG00000075223	SEMA3C
92	E	ENSG00000075275	CELSR1
93	E	ENSG00000075340	ADD2
94	E	ENSG00000075426	FOSL2
95	E	ENSG00000075461	CACNG4
96	E	ENSG00000075618	FSCN1
97	E	ENSG00000077942	FBLN1
98	E	ENSG00000079308	TNS1
99	E	ENSG00000081692	JMJD4
100	E	ENSG00000082014	SMARCD3
101	E	ENSG00000083444	PLOD1
102	E	ENSG00000084444	FAM234B
103	E	ENSG00000084693	AGBL5
104	E	ENSG00000085365	SCAMP1
105	E	ENSG00000085831	TTC39A
106	E	ENSG00000086300	SNX10
107	E	ENSG00000086619	ERO1B
108	E	ENSG00000087076	HSD17B14
109	E	ENSG00000088367	EPB41L1
110	E	ENSG00000088832	FKBP1A
111	E	ENSG00000089053	ANAPC5
112	E	ENSG00000089327	FXYD5
113	E	ENSG00000089351	GRAMD1A
114	E	ENSG00000089597	GANAB
115	E	ENSG00000090006	LTBP4
116	E	ENSG00000090097	PCBP4
117	E	ENSG00000090339	ICAM1
118	E	ENSG00000090615	GOLGA3
119	E	ENSG00000090776	EFNB1
120	E	ENSG00000090863	GLG1
121	E	ENSG00000091262	ABCC6
122	E	ENSG00000091428	RAPGEF4
123	E	ENSG00000091947	TMEM101
124	E	ENSG00000091986	CCDC80
125	E	ENSG00000092096	SLC22A17
126	E	ENSG00000092964	DPYSL2
127	E	ENSG00000095015	MAP3K1
128	E	ENSG00000095539	SEMA4G
129	E	ENSG00000095587	TLL2
130	E	ENSG00000099284	MACROH2A2
131	E	ENSG00000099330	OCEL1
132	E	ENSG00000099337	KCNK6
133	E	ENSG00000099377	HSD3B7
134	E	ENSG00000099864	PALM
135	E	ENSG00000099904	ZDHHC8
136	E	ENSG00000100033	PRODH
137	E	ENSG00000100097	LGALS1
138	E	ENSG00000100129	EIF3L
139	E	ENSG00000100196	KDELR3
140	E	ENSG00000100271	TTLL1
141	E	ENSG00000100285	NEFH
142	E	ENSG00000100299	ARSA
143	E	ENSG00000100316	RPL3
144	E	ENSG00000100353	EIF3D
145	E	ENSG00000100379	KCTD17
146	E	ENSG00000100504	PYGL
147	E	ENSG00000100583	SAMD15
148	E	ENSG00000100593	ISM2
149	E	ENSG00000100600	LGMN
150	E	ENSG00000100612	DHRS7
151	E	ENSG00000100626	GALNT16
152	E	ENSG00000100982	PCIF1
153	E	ENSG00000101000	PROCR
154	E	ENSG00000101236	RNF24
155	E	ENSG00000101265	RASSF2
156	E	ENSG00000101443	WFDC2
157	E	ENSG00000101445	PPP1R16B
158	E	ENSG00000101460	MAP1LC3A
159	E	ENSG00000101940	WDR13
160	E	ENSG00000101955	SRPX
161	E	ENSG00000102144	PGK1
162	E	ENSG00000102265	TIMP1
163	E	ENSG00000102309	PIN4
164	E	ENSG00000102316	MAGED2
165	E	ENSG00000102580	DNAJC3
166	E	ENSG00000102854	MSLN
167	E	ENSG00000102967	DHODH
168	E	ENSG00000102996	MMP15
169	E	ENSG00000103023	PRSS54
170	E	ENSG00000103067	ESRP2
171	E	ENSG00000103145	HCFC1R1
172	E	ENSG00000103154	NECAB2
173	E	ENSG00000103227	LMF1
174	E	ENSG00000103316	CRYM
175	E	ENSG00000103351	CLUAP1
176	E	ENSG00000103381	CPPED1
177	E	ENSG00000103460	TOX3
178	E	ENSG00000103485	QPRT
179	E	ENSG00000103507	BCKDK
180	E	ENSG00000103544	VPS35L
181	E	ENSG00000103811	CTSH
182	E	ENSG00000104324	CPQ
183	E	ENSG00000104332	SFRP1
184	E	ENSG00000104408	EIF3E
185	E	ENSG00000104419	NDRG1
186	E	ENSG00000104518	GSDMD
187	E	ENSG00000104524	PYCR3
188	E	ENSG00000104723	TUSC3
189	E	ENSG00000104765	BNIP3L
190	E	ENSG00000104774	MAN2B1
191	E	ENSG00000104805	NUCB1
192	E	ENSG00000104812	GYS1
193	E	ENSG00000104814	MAP4K1
194	E	ENSG00000104833	TUBB4A
195	E	ENSG00000104870	FCGRT
196	E	ENSG00000104872	PIH1D1
197	E	ENSG00000104901	DKKL1
198	E	ENSG00000105048	TNNT1
199	E	ENSG00000105088	OLFM2
200	E	ENSG00000105173	CCNE1
201	E	ENSG00000105186	ANKRD27
202	E	ENSG00000105223	PLD3
203	E	ENSG00000105289	TJP3
204	E	ENSG00000105290	APLP1
205	E	ENSG00000105373	NOP53
206	E	ENSG00000105404	RABAC1
207	E	ENSG00000105426	PTPRS
208	E	ENSG00000105429	MEGF8
209	E	ENSG00000105438	KDELR1
210	E	ENSG00000105618	PRPF31
211	E	ENSG00000105640	RPL18A
212	E	ENSG00000105649	RAB3A
213	E	ENSG00000105655	ISYNA1
214	E	ENSG00000105664	COMP
215	E	ENSG00000105668	UPK1A
216	E	ENSG00000105699	LSR
217	E	ENSG00000105701	FKBP8
218	E	ENSG00000105755	ETHE1
219	E	ENSG00000105767	CADM4
220	E	ENSG00000105829	BET1
221	E	ENSG00000105928	GSDME
222	E	ENSG00000105982	RNF32
223	E	ENSG00000106049	HIBADH
224	E	ENSG00000106236	NPTX2
225	E	ENSG00000106330	MOSPD3
226	E	ENSG00000106392	C1GALT1
227	E	ENSG00000106537	TSPAN13
228	E	ENSG00000106665	CLIP2
229	E	ENSG00000106688	SLC1A1
230	E	ENSG00000106799	TGFBR1
231	E	ENSG00000107331	ABCA2
232	E	ENSG00000107438	PDLIM1
233	E	ENSG00000107518	ATRNL1
234	E	ENSG00000107874	CUEDC2
235	E	ENSG00000107954	NEURL1
236	E	ENSG00000107957	SH3PXD2A
237	E	ENSG00000108107	RPL28
238	E	ENSG00000108387	SEPTIN4
239	E	ENSG00000108406	DHX40
240	E	ENSG00000108439	PNPO
241	E	ENSG00000108443	RPS6KB1
242	E	ENSG00000108479	GALK1
243	E	ENSG00000108641	B9D1
244	E	ENSG00000108679	LGALS3BP
245	E	ENSG00000108839	ALOX12
246	E	ENSG00000108984	MAP2K6
247	E	ENSG00000110011	DNAJC4
248	E	ENSG00000110013	SIAE
249	E	ENSG00000110237	ARHGEF17
250	E	ENSG00000110328	GALNT18
251	E	ENSG00000110400	NECTIN1
252	E	ENSG00000110427	KIAA1549L
253	E	ENSG00000110492	MDK
254	E	ENSG00000110697	PITPNM1
255	E	ENSG00000110881	ASIC1
256	E	ENSG00000110917	MLEC
257	E	ENSG00000111358	GTF2H3
258	E	ENSG00000111674	ENO2
259	E	ENSG00000111907	TPD52L1
260	E	ENSG00000112357	PEX7
261	E	ENSG00000112378	PERP
262	E	ENSG00000112473	SLC39A7
263	E	ENSG00000112561	TFEB
264	E	ENSG00000112655	PTK7
265	E	ENSG00000112715	VEGFA
266	E	ENSG00000112964	GHR
267	E	ENSG00000113048	MRPS27
268	E	ENSG00000113083	LOX
269	E	ENSG00000113211	PCDHB6
270	E	ENSG00000113389	NPR3
271	E	ENSG00000113391	ARB2A
272	E	ENSG00000113734	BNIP1
273	E	ENSG00000113763	UNC5A
274	E	ENSG00000113790	EHHADH
275	E	ENSG00000114023	FAM162A
276	E	ENSG00000114200	BCHE
277	E	ENSG00000114268	PFKFB4
278	E	ENSG00000114391	RPL24
279	E	ENSG00000114646	CSPG5
280	E	ENSG00000114956	DGUOK
281	E	ENSG00000114993	RTKN
282	E	ENSG00000115128	SF3B6
283	E	ENSG00000115255	REEP6
284	E	ENSG00000115268	RPS15
285	E	ENSG00000115380	EFEMP1
286	E	ENSG00000115414	FN1
287	E	ENSG00000115468	EFHD1
288	E	ENSG00000115486	GGCX
289	E	ENSG00000115866	DARS1
290	E	ENSG00000116106	EPHA4
291	E	ENSG00000116209	TMEM59
292	E	ENSG00000116260	QSOX1
293	E	ENSG00000116574	RHOU
294	E	ENSG00000116663	FBXO6
295	E	ENSG00000116679	IVNS1ABP
296	E	ENSG00000116852	KIF21B
297	E	ENSG00000116857	TMEM9
298	E	ENSG00000116962	NID1
299	E	ENSG00000116983	HPCAL4
300	E	ENSG00000116984	MTR
301	E	ENSG00000117115	PADI2
302	E	ENSG00000117151	CTBS
303	E	ENSG00000117245	KIF17
304	E	ENSG00000117266	CDK18
305	E	ENSG00000117298	ECE1
306	E	ENSG00000117593	DARS2
307	E	ENSG00000117682	DHDDS
308	E	ENSG00000117697	NSL1
309	E	ENSG00000118523	CCN2
310	E	ENSG00000118898	PPL
311	E	ENSG00000119227	PIGZ
312	E	ENSG00000119411	BSPRY
313	E	ENSG00000119632	IFI27L2
314	E	ENSG00000119681	LTBP2
315	E	ENSG00000119698	PPP4R4
316	E	ENSG00000119950	MXI1
317	E	ENSG00000120278	PLEKHG1
318	E	ENSG00000120322	PCDHB8
319	E	ENSG00000120708	TGFBI
320	E	ENSG00000120725	SIL1
321	E	ENSG00000120903	CHRNA2
322	E	ENSG00000121390	PSPC1
323	E	ENSG00000121578	B4GALT4
324	E	ENSG00000121774	KHDRBS1
325	E	ENSG00000122299	ZC3H7A
326	E	ENSG00000122490	SLC66A2
327	E	ENSG00000122574	WIPF3
328	E	ENSG00000122870	BICC1
329	E	ENSG00000122884	P4HA1
330	E	ENSG00000123243	ITIH5
331	E	ENSG00000123453	SARDH
332	E	ENSG00000123933	MXD4
333	E	ENSG00000124126	PREX1
334	E	ENSG00000124177	CHD6
335	E	ENSG00000124232	RBPJL
336	E	ENSG00000124466	LYPD3
337	E	ENSG00000124507	PACSIN1
338	E	ENSG00000124608	AARS2
339	E	ENSG00000124767	GLO1
340	E	ENSG00000124785	NRN1
341	E	ENSG00000124920	MYRF
342	E	ENSG00000125246	CLYBL
343	E	ENSG00000125398	SOX9
344	E	ENSG00000125629	INSIG2
345	E	ENSG00000125691	RPL23
346	E	ENSG00000125734	GPR108
347	E	ENSG00000125746	EML2
348	E	ENSG00000125772	GPCPD1
349	E	ENSG00000126012	KDM5C
350	E	ENSG00000126107	HECTD3
351	E	ENSG00000126458	RRAS
352	E	ENSG00000126500	FLRT1
353	E	ENSG00000126522	ASL
354	E	ENSG00000126803	HSPA2
355	E	ENSG00000126878	AIF1L
356	E	ENSG00000127054	INTS11
357	E	ENSG00000127081	ZNF484
358	E	ENSG00000127124	HIVEP3
359	E	ENSG00000127418	FGFRL1
360	E	ENSG00000127663	KDM4B
361	E	ENSG00000127831	VIL1
362	E	ENSG00000127838	PNKD
363	E	ENSG00000127955	GNAI1
364	E	ENSG00000128011	LRFN1
365	E	ENSG00000128228	SDF2L1
366	E	ENSG00000128242	GAL3ST1
367	E	ENSG00000128266	GNAZ
368	E	ENSG00000128309	MPST
369	E	ENSG00000128340	RAC2
370	E	ENSG00000128567	PODXL
371	E	ENSG00000128849	CGNL1
372	E	ENSG00000129038	LOXL1
373	E	ENSG00000129103	SUMF2
374	E	ENSG00000129353	SLC44A2
375	E	ENSG00000129451	KLK10
376	E	ENSG00000129521	EGLN3
377	E	ENSG00000129757	CDKN1C
378	E	ENSG00000129824	RPS4Y1
379	E	ENSG00000129910	CDH15
380	E	ENSG00000129951	PLPPR3
381	E	ENSG00000130158	DOCK6
382	E	ENSG00000130175	PRKCSH
383	E	ENSG00000130255	RPL36
384	E	ENSG00000130304	SLC27A1
385	E	ENSG00000130475	FCHO1
386	E	ENSG00000130600	H19
387	E	ENSG00000130669	PAK4
388	E	ENSG00000130707	ASS1
389	E	ENSG00000130821	SLC6A8
390	E	ENSG00000130829	DUSP9
391	E	ENSG00000131094	C1QL1
392	E	ENSG00000131187	F12
393	E	ENSG00000131196	NFATC1
394	E	ENSG00000131378	RFTN1
395	E	ENSG00000131409	LRRC4B
396	E	ENSG00000131469	RPL27
397	E	ENSG00000131650	KREMEN2
398	E	ENSG00000131652	THOC6
399	E	ENSG00000131788	PIAS3
400	E	ENSG00000131899	LLGL1
401	E	ENSG00000132170	PPARG
402	E	ENSG00000132334	PTPRE
403	E	ENSG00000132356	PRKAA1
404	E	ENSG00000132470	ITGB4
405	E	ENSG00000132518	GUCY2D
406	E	ENSG00000132692	BCAN
407	E	ENSG00000132718	SYT11
408	E	ENSG00000132821	VSTM2L
409	E	ENSG00000132938	MTUS2
410	E	ENSG00000133027	PEMT
411	E	ENSG00000133101	CCNA1
412	E	ENSG00000133103	COG6
413	E	ENSG00000133131	MORC4
414	E	ENSG00000133195	SLC39A11
415	E	ENSG00000133216	EPHB2
416	E	ENSG00000133243	BTBD2
417	E	ENSG00000133275	CSNK1G2
418	E	ENSG00000133606	MKRN1
419	E	ENSG00000134107	BHLHE40
420	E	ENSG00000134207	SYT6
421	E	ENSG00000134247	PTGFRN
422	E	ENSG00000134419	RPS15A
423	E	ENSG00000134463	ECHDC3
424	E	ENSG00000134531	EMP1
425	E	ENSG00000134762	DSC3
426	E	ENSG00000134775	FHOD3
427	E	ENSG00000134864	GGACT
428	E	ENSG00000134871	COL4A2
429	E	ENSG00000134873	CLDN10
430	E	ENSG00000135048	CEMIP2
431	E	ENSG00000135124	P2RX4
432	E	ENSG00000135144	DTX1
433	E	ENSG00000135392	DNAJC14
434	E	ENSG00000135506	OS9
435	E	ENSG00000135605	TEC
436	E	ENSG00000135622	SEMA4F
437	E	ENSG00000135624	CCT7
438	E	ENSG00000135916	ITM2C
439	E	ENSG00000136158	SPRY2
440	E	ENSG00000136213	CHST12
441	E	ENSG00000136261	BZW2
442	E	ENSG00000136319	TTC5
443	E	ENSG00000136327	NKX2-8
444	E	ENSG00000136378	ADAMTS7
445	E	ENSG00000136425	CIB2
446	E	ENSG00000136720	HS6ST1
447	E	ENSG00000136854	STXBP1
448	E	ENSG00000136943	CTSV
449	E	ENSG00000136997	MYC
450	E	ENSG00000137094	DNAJB5
451	E	ENSG00000137154	RPS6
452	E	ENSG00000137198	GMPR
453	E	ENSG00000137207	YIPF3
454	E	ENSG00000137269	LRRC1
455	E	ENSG00000137312	FLOT1
456	E	ENSG00000137331	IER3
457	E	ENSG00000137720	CFAP68
458	E	ENSG00000137819	PAQR5
459	E	ENSG00000137970	RPL7P9
460	E	ENSG00000138028	CGREF1
461	E	ENSG00000138131	LOXL4
462	E	ENSG00000138166	DUSP5
463	E	ENSG00000138172	CALHM2
464	E	ENSG00000138286	FAM149B1
465	E	ENSG00000138587	MNS1
466	E	ENSG00000138606	SHF
467	E	ENSG00000138613	APH1B
468	E	ENSG00000138623	SEMA7A
469	E	ENSG00000138735	PDE5A
470	E	ENSG00000138759	FRAS1
471	E	ENSG00000138780	GSTCD
472	E	ENSG00000138801	PAPSS1
473	E	ENSG00000138814	PPP3CA
474	E	ENSG00000139044	B4GALNT3
475	E	ENSG00000139289	PHLDA1
476	E	ENSG00000139323	POC1B
477	E	ENSG00000139370	SLC15A4
478	E	ENSG00000139579	NABP2
479	E	ENSG00000139629	GALNT6
480	E	ENSG00000139832	RAB20
481	E	ENSG00000140092	FBLN5
482	E	ENSG00000140395	SKIC8
483	E	ENSG00000140463	BBS4
484	E	ENSG00000140465	CYP1A1
485	E	ENSG00000140505	CYP1A2
486	E	ENSG00000140575	IQGAP1
487	E	ENSG00000140688	RUSF1
488	E	ENSG00000140854	KATNB1
489	E	ENSG00000140943	MBTPS1
490	E	ENSG00000140988	RPS2
491	E	ENSG00000141295	SCRN2
492	E	ENSG00000141376	BCAS3
493	E	ENSG00000141506	PIK3R5
494	E	ENSG00000141524	TMC6
495	E	ENSG00000141526	SLC16A3
496	E	ENSG00000141562	NARF
497	E	ENSG00000141564	RPTOR
498	E	ENSG00000141577	CEP131
499	E	ENSG00000141639	MAPK4
500	E	ENSG00000141753	IGFBP4
501	E	ENSG00000141756	FKBP10
502	E	ENSG00000141959	PFKL
503	E	ENSG00000141971	MVB12A
504	E	ENSG00000142156	COL6A1
505	E	ENSG00000142173	COL6A2
506	E	ENSG00000142453	CARM1
507	E	ENSG00000142459	EVI5L
508	E	ENSG00000142541	RPL13A
509	E	ENSG00000142549	IGLON5
510	E	ENSG00000142552	RCN3
511	E	ENSG00000142611	PRDM16
512	E	ENSG00000142655	PEX14
513	E	ENSG00000142676	RPL11
514	E	ENSG00000142798	HSPG2
515	E	ENSG00000142864	SERBP1
516	E	ENSG00000142871	CCN1
517	E	ENSG00000142937	RPS8
518	E	ENSG00000142949	PTPRF
519	E	ENSG00000143079	CTTNBP2NL
520	E	ENSG00000143320	CRABP2
521	E	ENSG00000143324	XPR1
522	E	ENSG00000143363	PRUNE1
523	E	ENSG00000143374	TARS2
524	E	ENSG00000143382	ADAMTSL4
525	E	ENSG00000143457	GOLPH3L
526	E	ENSG00000143502	SUSD4
527	E	ENSG00000143515	ATP8B2
528	E	ENSG00000143590	EFNA3
529	E	ENSG00000143603	KCNN3
530	E	ENSG00000143870	PDIA6
531	E	ENSG00000143882	ATP6V1C2
532	E	ENSG00000143994	ABHD1
533	E	ENSG00000144591	GMPPA
534	E	ENSG00000144668	ITGA9
535	E	ENSG00000144713	RPL32
536	E	ENSG00000144824	PHLDB2
537	E	ENSG00000144827	ABHD10
538	E	ENSG00000144857	BOC
539	E	ENSG00000144908	ALDH1L1
540	E	ENSG00000145050	MANF
541	E	ENSG00000145287	PLAC8
542	E	ENSG00000145358	DDIT4L
543	E	ENSG00000145425	RPS3A
544	E	ENSG00000145569	OTULINL
545	E	ENSG00000145687	SSBP2
546	E	ENSG00000145703	IQGAP2
547	E	ENSG00000145723	GIN1
548	E	ENSG00000145901	TNIP1
549	E	ENSG00000146205	ANO7
550	E	ENSG00000146223	RPL7L1
551	E	ENSG00000146416	AIG1
552	E	ENSG00000146555	SDK1
553	E	ENSG00000146950	SHROOM2
554	E	ENSG00000147082	CCNB3
555	E	ENSG00000147100	SLC16A2
556	E	ENSG00000147394	ZNF185
557	E	ENSG00000147604	RPL7
558	E	ENSG00000147676	MAL2
559	E	ENSG00000147677	EIF3H
560	E	ENSG00000147813	NAPRT
561	E	ENSG00000148154	UGCG
562	E	ENSG00000148180	GSN
563	E	ENSG00000148303	RPL7A
564	E	ENSG00000148468	FAM171A1
565	E	ENSG00000148481	MINDY3
566	E	ENSG00000148803	FUOM
567	E	ENSG00000149131	SERPING1
568	E	ENSG00000149179	CSTPP1
569	E	ENSG00000149260	CAPN5
570	E	ENSG00000149273	RPS3
571	E	ENSG00000149328	GLB1L2
572	E	ENSG00000149428	HYOU1
573	E	ENSG00000149557	FEZ1
574	E	ENSG00000149573	MPZL2
575	E	ENSG00000149577	SIDT2
576	E	ENSG00000149582	TMEM25
577	E	ENSG00000149823	VPS51
578	E	ENSG00000150347	ARID5B
579	E	ENSG00000150457	LATS2
580	E	ENSG00000150630	VEGFC
581	E	ENSG00000150756	ATPSCKMT
582	E	ENSG00000150938	CRIM1
583	E	ENSG00000150961	SEC24D
584	E	ENSG00000151135	TMEM263
585	E	ENSG00000151240	DIP2C
586	E	ENSG00000151611	MMAA
587	E	ENSG00000151640	DPYSL4
588	E	ENSG00000151779	NBAS
589	E	ENSG00000152256	PDK1
590	E	ENSG00000152377	SPOCK1
591	E	ENSG00000152422	XRCC4
592	E	ENSG00000152492	CCDC50
593	E	ENSG00000152580	IGSF10
594	E	ENSG00000152661	GJA1
595	E	ENSG00000153048	CARHSP1
596	E	ENSG00000153162	BMP6
597	E	ENSG00000153246	PLA2R1
598	E	ENSG00000153531	ADPRHL1
599	E	ENSG00000154059	IMPACT
600	E	ENSG00000154127	UBASH3B
601	E	ENSG00000154146	NRGN
602	E	ENSG00000154153	RETREG1
603	E	ENSG00000154310	TNIK
604	E	ENSG00000154330	PGM5
605	E	ENSG00000154511	DIPK1A
606	E	ENSG00000154930	ACSS1
607	E	ENSG00000155066	PROM2
608	E	ENSG00000155367	PPM1J
609	E	ENSG00000155463	OXA1L
610	E	ENSG00000155629	PIK3AP1
611	E	ENSG00000155660	PDIA4
612	E	ENSG00000155760	FZD7
613	E	ENSG00000155792	DEPTOR
614	E	ENSG00000155876	RRAGA
615	E	ENSG00000156218	ADAMTSL3
616	E	ENSG00000156253	RWDD2B
617	E	ENSG00000156298	TSPAN7
618	E	ENSG00000156453	PCDH1
619	E	ENSG00000156515	HK1
620	E	ENSG00000156587	UBE2L6
621	E	ENSG00000156711	MAPK13
622	E	ENSG00000156990	RPUSD3
623	E	ENSG00000157152	SYN2
624	E	ENSG00000157193	LRP8
625	E	ENSG00000157227	MMP14
626	E	ENSG00000157483	MYO1E
627	E	ENSG00000157514	TSC22D3
628	E	ENSG00000157570	TSPAN18
629	E	ENSG00000157637	SLC38A10
630	E	ENSG00000157890	MEGF11
631	E	ENSG00000158019	BABAM2
632	E	ENSG00000158089	GALNT14
633	E	ENSG00000158270	COLEC12
634	E	ENSG00000158292	GPR153
635	E	ENSG00000158623	COPG2
636	E	ENSG00000158636	EMSY
637	E	ENSG00000158769	F11R
638	E	ENSG00000158825	CDA
639	E	ENSG00000159111	MRPL10
640	E	ENSG00000159167	STC1
641	E	ENSG00000159307	SCUBE1
642	E	ENSG00000159399	HK2
643	E	ENSG00000159403	C1R
644	E	ENSG00000159596	TMEM69
645	E	ENSG00000159640	ACE
646	E	ENSG00000159761	C16orf86
647	E	ENSG00000160193	WDR4
648	E	ENSG00000160216	AGPAT3
649	E	ENSG00000160233	LRRC3
650	E	ENSG00000160293	VAV2
651	E	ENSG00000160404	TOR2A
652	E	ENSG00000160410	SHKBP1
653	E	ENSG00000160446	ZDHHC12
654	E	ENSG00000160801	PTH1R
655	E	ENSG00000160867	FGFR4
656	E	ENSG00000160991	ORAI2
657	E	ENSG00000161016	RPL8
658	E	ENSG00000161243	FBXO27
659	E	ENSG00000161249	DMKN
660	E	ENSG00000161513	FDXR
661	E	ENSG00000161638	ITGA5
662	E	ENSG00000161653	NAGS
663	E	ENSG00000161999	JMJD8
664	E	ENSG00000162105	SHANK2
665	E	ENSG00000162244	RPL29
666	E	ENSG00000162337	LRP5
667	E	ENSG00000162433	AK4
668	E	ENSG00000162496	DHRS3
669	E	ENSG00000162512	SDC3
670	E	ENSG00000162591	MEGF6
671	E	ENSG00000162729	IGSF8
672	E	ENSG00000162738	VANGL2
673	E	ENSG00000162980	ARL5A
674	E	ENSG00000163171	CDC42EP3
675	E	ENSG00000163297	ANTXR2
676	E	ENSG00000163322	ABRAXAS1
677	E	ENSG00000163328	GPR155
678	E	ENSG00000163521	GLB1L
679	E	ENSG00000163638	ADAMTS9
680	E	ENSG00000163659	TIPARP
681	E	ENSG00000163795	ZNF513
682	E	ENSG00000163814	CDCP1
683	E	ENSG00000163818	LZTFL1
684	E	ENSG00000163933	RFT1
685	E	ENSG00000163956	LRPAP1
686	E	ENSG00000163995	ABLIM2
687	E	ENSG00000164040	PGRMC2
688	E	ENSG00000164056	SPRY1
689	E	ENSG00000164062	APEH
690	E	ENSG00000164096	C4orf3
691	E	ENSG00000164099	PRSS12
692	E	ENSG00000164244	PRRC1
693	E	ENSG00000164638	SLC29A4
694	E	ENSG00000164659	ELAPOR2
695	E	ENSG00000164741	DLC1
696	E	ENSG00000164751	PEX2
697	E	ENSG00000164818	DNAAF5
698	E	ENSG00000164850	GPER1
699	E	ENSG00000164867	NOS3
700	E	ENSG00000164951	PDP1
701	E	ENSG00000164975	SNAPC3
702	E	ENSG00000164976	MYORG
703	E	ENSG00000164983	TMEM65
704	E	ENSG00000165195	PIGA
705	E	ENSG00000165215	CLDN3
706	E	ENSG00000165272	AQP3
707	E	ENSG00000165424	ZCCHC24
708	E	ENSG00000165516	KLHDC2
709	E	ENSG00000165695	AK8
710	E	ENSG00000165704	HPRT1
711	E	ENSG00000165813	CCDC186
712	E	ENSG00000165887	ANKRD2
713	E	ENSG00000165905	LARGE2
714	E	ENSG00000165912	PACSIN3
715	E	ENSG00000165929	TC2N
716	E	ENSG00000166106	ADAMTS15
717	E	ENSG00000166128	RAB8B
718	E	ENSG00000166145	SPINT1
719	E	ENSG00000166171	DPCD
720	E	ENSG00000166250	CLMP
721	E	ENSG00000166352	IFTAP
722	E	ENSG00000166435	XRRA1
723	E	ENSG00000166557	TMED3
724	E	ENSG00000166598	HSP90B1
725	E	ENSG00000166794	PPIB
726	E	ENSG00000166816	LDHD
727	E	ENSG00000166840	GLYATL1
728	E	ENSG00000167004	PDIA3
729	E	ENSG00000167105	TMEM92
730	E	ENSG00000167110	GOLGA2
731	E	ENSG00000167123	CERCAM
732	E	ENSG00000167157	PRRX2
733	E	ENSG00000167191	GPRC5B
734	E	ENSG00000167244	IGF2
735	E	ENSG00000167291	TBC1D16
736	E	ENSG00000167306	MYO5B
737	E	ENSG00000167526	RPL13
738	E	ENSG00000167552	TUBA1A
739	E	ENSG00000167617	CDC42EP5
740	E	ENSG00000167641	PPP1R14A
741	E	ENSG00000167642	SPINT2
742	E	ENSG00000167645	YIF1B
743	E	ENSG00000167674	HDGFL2
744	E	ENSG00000167700	MFSD3
745	E	ENSG00000167703	SLC43A2
746	E	ENSG00000167748	KLK1
747	E	ENSG00000167749	KLK4
748	E	ENSG00000167779	IGFBP6
749	E	ENSG00000167792	NDUFV1
750	E	ENSG00000167797	CDK2AP2
751	E	ENSG00000167799	NUDT8
752	E	ENSG00000168077	SCARA3
753	E	ENSG00000168209	DDIT4
754	E	ENSG00000168214	RBPJ
755	E	ENSG00000168216	LMBRD1
756	E	ENSG00000168243	GNG4
757	E	ENSG00000168280	KIF5C
758	E	ENSG00000168389	MFSD2A
759	E	ENSG00000168481	LGI3
760	E	ENSG00000168528	SERINC2
761	E	ENSG00000168710	AHCYL1
762	E	ENSG00000168765	GSTM4
763	E	ENSG00000168913	ENHO
764	E	ENSG00000169071	ROR2
765	E	ENSG00000169093	ASMTL
766	E	ENSG00000169100	SLC25A6
767	E	ENSG00000169116	PARM1
768	E	ENSG00000169189	NSMCE1
769	E	ENSG00000169213	RAB3B
770	E	ENSG00000169231	THBS3
771	E	ENSG00000169239	CA5B
772	E	ENSG00000169258	GPRIN1
773	E	ENSG00000169288	MRPL1
774	E	ENSG00000169375	SIN3A
775	E	ENSG00000169499	PLEKHA2
776	E	ENSG00000169583	CLIC3
777	E	ENSG00000169750	RAC3
778	E	ENSG00000169783	LINGO1
779	E	ENSG00000169894	MUC3A
780	E	ENSG00000170144	HNRNPA3
781	E	ENSG00000170379	TCAF2
782	E	ENSG00000170382	LRRN2
783	E	ENSG00000170430	MGMT
784	E	ENSG00000170525	PFKFB3
785	E	ENSG00000170571	EMB
786	E	ENSG00000170745	KCNS3
787	E	ENSG00000170801	HTRA3
788	E	ENSG00000170837	GPR27
789	E	ENSG00000170889	RPS9
790	E	ENSG00000170899	GSTA4
791	E	ENSG00000171174	RBKS
792	E	ENSG00000171262	FAM98B
793	E	ENSG00000171310	CHST11
794	E	ENSG00000171603	CLSTN1
795	E	ENSG00000171608	PIK3CD
796	E	ENSG00000171811	CFAP46
797	E	ENSG00000171812	COL8A2
798	E	ENSG00000171954	CYP4F22
799	E	ENSG00000171992	SYNPO
800	E	ENSG00000172031	EPHX4
801	E	ENSG00000172061	LRRC15
802	E	ENSG00000172137	CALB2
803	E	ENSG00000172716	SLFN11
804	E	ENSG00000172782	FADS6
805	E	ENSG00000172828	CES3
806	E	ENSG00000172831	CES2
807	E	ENSG00000172889	EGFL7
808	E	ENSG00000173175	ADCY5
809	E	ENSG00000173210	ABLIM3
810	E	ENSG00000173281	PPP1R3B
811	E	ENSG00000173376	NDNF
812	E	ENSG00000173456	RNF26
813	E	ENSG00000173482	PTPRM
814	E	ENSG00000173530	TNFRSF10D
815	E	ENSG00000173557	CIMIP2C
816	E	ENSG00000173706	HEG1
817	E	ENSG00000173890	GPR160
818	E	ENSG00000174080	CTSF
819	E	ENSG00000174444	RPL4
820	E	ENSG00000174669	SLC29A2
821	E	ENSG00000174672	BRSK2
822	E	ENSG00000174748	RPL15
823	E	ENSG00000174938	SEZ6L2
824	E	ENSG00000174989	FBXW8
825	E	ENSG00000175061	SNHG29
826	E	ENSG00000175115	PACS1
827	E	ENSG00000175183	CSRP2
828	E	ENSG00000175274	TP53I11
829	E	ENSG00000175390	EIF3F
830	E	ENSG00000175395	ZNF25
831	E	ENSG00000175600	SUGCT
832	E	ENSG00000175826	CTDNEP1
833	E	ENSG00000176108	CHMP6
834	E	ENSG00000176171	BNIP3
835	E	ENSG00000176399	DMRTA1
836	E	ENSG00000176410	DNAJC30
837	E	ENSG00000176533	GNG7
838	E	ENSG00000176845	METRNL
839	E	ENSG00000176986	SEC24C
840	E	ENSG00000177106	EPS8L2
841	E	ENSG00000177150	FAM210A
842	E	ENSG00000177181	RIMKLA
843	E	ENSG00000177239	MAN1B1
844	E	ENSG00000177352	CCDC71
845	E	ENSG00000177383	MAGEF1
846	E	ENSG00000177830	CHID1
847	E	ENSG00000177981	ASB8
848	E	ENSG00000178053	MLF1
849	E	ENSG00000178057	NDUFAF3
850	E	ENSG00000178149	DALRD3
851	E	ENSG00000178150	ZNF114
852	E	ENSG00000178184	PARD6G
853	E	ENSG00000178425	NT5DC1
854	E	ENSG00000178445	GLDC
855	E	ENSG00000178597	PSAPL1
856	E	ENSG00000178695	KCTD12
857	E	ENSG00000178802	MPI
858	E	ENSG00000178814	OPLAH
859	E	ENSG00000178947	SMIM10L2A
860	E	ENSG00000178971	CTC1
861	E	ENSG00000179119	SPTY2D1
862	E	ENSG00000179163	FUCA1
863	E	ENSG00000179218	CALR
864	E	ENSG00000179222	MAGED1
865	E	ENSG00000179262	RAD23A
866	E	ENSG00000179348	GATA2
867	E	ENSG00000179403	VWA1
868	E	ENSG00000179477	ALOX12B
869	E	ENSG00000179820	MYADM
870	E	ENSG00000179869	ABCA13
871	E	ENSG00000180044	C3orf80
872	E	ENSG00000180340	FZD2
873	E	ENSG00000180535	BHLHA15
874	E	ENSG00000180767	CHST13
875	E	ENSG00000180921	FAM83H
876	E	ENSG00000181031	RPH3AL
877	E	ENSG00000181104	F2R
878	E	ENSG00000181444	ZNF467
879	E	ENSG00000181789	COPG1
880	E	ENSG00000182022	CHST15
881	E	ENSG00000182054	IDH2
882	E	ENSG00000182199	SHMT2
883	E	ENSG00000182240	BACE2
884	E	ENSG00000182557	SPNS3
885	E	ENSG00000182704	TSKU
886	E	ENSG00000182809	CRIP2
887	E	ENSG00000182871	COL18A1
888	E	ENSG00000182899	RPL35A
889	E	ENSG00000183010	PYCR1
890	E	ENSG00000183250	LINC01547
891	E	ENSG00000183287	CCBE1
892	E	ENSG00000183340	JRKL
893	E	ENSG00000183578	TNFAIP8L3
894	E	ENSG00000183876	ARSI
895	E	ENSG00000184014	DENND5A
896	E	ENSG00000184117	NIPSNAP1
897	E	ENSG00000184144	CNTN2
898	E	ENSG00000184156	KCNQ3
899	E	ENSG00000184254	ALDH1A3
900	E	ENSG00000184489	PTP4A3
901	E	ENSG00000184508	HDDC3
902	E	ENSG00000184584	STING1
903	E	ENSG00000184640	SEPTIN9
904	E	ENSG00000184719	RNLS
905	E	ENSG00000184840	TMED9
906	E	ENSG00000184867	ARMCX2
907	E	ENSG00000184897	H1-10
908	E	ENSG00000184916	JAG2
909	E	ENSG00000184986	TMEM121
910	E	ENSG00000185000	DGAT1
911	E	ENSG00000185019	UBOX5
912	E	ENSG00000185033	SEMA4B
913	E	ENSG00000185127	C6orf120
914	E	ENSG00000185338	SOCS1
915	E	ENSG00000185504	FAAP100
916	E	ENSG00000185519	FAM131C
917	E	ENSG00000185567	AHNAK2
918	E	ENSG00000185585	OLFML2A
919	E	ENSG00000185624	P4HB
920	E	ENSG00000185664	PMEL
921	E	ENSG00000185745	IFIT1
922	E	ENSG00000185989	RASA3
923	E	ENSG00000186314	PRELID2
924	E	ENSG00000186377	CYP4X1
925	E	ENSG00000186523	FAM86B1
926	E	ENSG00000186642	PDE2A
927	E	ENSG00000186806	VSIG10L
928	E	ENSG00000186854	TRABD2A
929	E	ENSG00000186868	MAPT
930	E	ENSG00000186897	C1QL4
931	E	ENSG00000186918	ZNF395
932	E	ENSG00000187024	PTRH1
933	E	ENSG00000187098	MITF
934	E	ENSG00000187244	BCAM
935	E	ENSG00000187486	KCNJ11
936	E	ENSG00000187601	MAGEH1
937	E	ENSG00000187624	LIAT1
938	E	ENSG00000187720	THSD4
939	E	ENSG00000187730	GABRD
940	E	ENSG00000188042	ARL4C
941	E	ENSG00000188064	WNT7B
942	E	ENSG00000188157	AGRN
943	E	ENSG00000188763	FZD9
944	E	ENSG00000188883	KLRG2
945	E	ENSG00000188921	HACD4
946	E	ENSG00000188994	ZNF292
947	E	ENSG00000189060	H1-0
948	E	ENSG00000196083	IL1RAP
949	E	ENSG00000196126	HLA-DRB1
950	E	ENSG00000196132	MYT1
951	E	ENSG00000196167	COLCA1
952	E	ENSG00000196376	SLC35F1
953	E	ENSG00000196422	PPP1R26
954	E	ENSG00000196428	TSC22D2
955	E	ENSG00000196465	MYL6B
956	E	ENSG00000196526	AFAP1
957	E	ENSG00000196549	MME
958	E	ENSG00000196557	CACNA1H
959	E	ENSG00000196743	GM2A
960	E	ENSG00000196781	TLE1
961	E	ENSG00000196924	FLNA
962	E	ENSG00000196972	SMIM10L2B
963	E	ENSG00000197043	ANXA6
964	E	ENSG00000197168	NEK5
965	E	ENSG00000197249	SERPINA1
966	E	ENSG00000197444	OGDHL
967	E	ENSG00000197496	SLC2A10
968	E	ENSG00000197557	IFT70A
969	E	ENSG00000197558	SSPOP
970	E	ENSG00000197635	DPP4
971	E	ENSG00000197653	DNAH10
972	E	ENSG00000197712	FAM114A1
973	E	ENSG00000197744	#N/A
974	E	ENSG00000197763	TXNRD3
975	E	ENSG00000197858	GPAA1
976	E	ENSG00000197958	RPL12
977	E	ENSG00000197976	AKAP17A
978	E	ENSG00000198034	RPS4X
979	E	ENSG00000198121	LPAR1
980	E	ENSG00000198231	DDX42
981	E	ENSG00000198246	SLC29A3
982	E	ENSG00000198417	MT1F
983	E	ENSG00000198435	NRARP
984	E	ENSG00000198682	PAPSS2
985	E	ENSG00000198700	IPO9
986	E	ENSG00000198732	SMOC1
987	E	ENSG00000198753	PLXNB3
988	E	ENSG00000198755	RPL10A
989	E	ENSG00000198832	SELENOM
990	E	ENSG00000198839	ZNF277
991	E	ENSG00000198856	OSTC
992	E	ENSG00000198910	L1CAM
993	E	ENSG00000198911	SREBF2
994	E	ENSG00000198915	RASGEF1A
995	E	ENSG00000198961	PJA2
996	E	ENSG00000203879	GDI1
997	E	ENSG00000204175	GPRIN2
998	E	ENSG00000204237	OXLD1
999	E	ENSG00000204287	HLA-DRA
1000	E	ENSG00000204308	RNF5
1001	E	ENSG00000204469	PRRC2A
1002	E	ENSG00000204525	HLA-C
1003	E	ENSG00000204592	HLA-E
1004	E	ENSG00000204628	RACK1
1005	E	ENSG00000204642	HLA-F
1006	E	ENSG00000205133	TRIQK
1007	E	ENSG00000205274	TRBV20OR9-2
1008	E	ENSG00000205362	MT1A
1009	E	ENSG00000206417	#N/A
1010	E	ENSG00000212864	RNF208
1011	E	ENSG00000213023	SYT3
1012	E	ENSG00000213626	LBH
1013	E	ENSG00000213672	NCKIPSD
1014	E	ENSG00000213676	ATF6B
1015	E	ENSG00000213700	RPL17P50
1016	E	ENSG00000213722	DDAH2
1017	E	ENSG00000213888	#N/A
1018	E	ENSG00000215021	PHB2
1019	E	ENSG00000215030	RPL13P12
1020	E	ENSG00000215256	DHRS4-AS1
1021	E	ENSG00000215612	HMX1
1022	E	ENSG00000219607	PPP1R3G
1023	E	ENSG00000220008	LINGO3
1024	E	ENSG00000221838	AP4M1
1025	E	ENSG00000221869	CEBPD
1026	E	ENSG00000223573	TINCR
1027	E	ENSG00000223865	HLA-DPB1
1028	E	ENSG00000224383	PRR29
1029	E	ENSG00000225205	PDK1-AS1
1030	E	ENSG00000225439	BOLA3-DT
1031	E	ENSG00000226124	FTCDNL1
1032	E	ENSG00000226137	BAIAP2-DT
1033	E	ENSG00000226510	UPK1A-AS1
1034	E	ENSG00000227051	C14orf132
1035	E	ENSG00000227432	#N/A
1036	E	ENSG00000228157	#N/A
1037	E	ENSG00000228288	PCAT6
1038	E	ENSG00000228594	FNDC10
1039	E	ENSG00000229638	RPL4P4
1040	E	ENSG00000229953	#N/A
1041	E	ENSG00000230432	#N/A
1042	E	ENSG00000230513	THAP7-AS1
1043	E	ENSG00000231156	#N/A
1044	E	ENSG00000231389	HLA-DPA1
1045	E	ENSG00000231881	#N/A
1046	E	ENSG00000233041	PHGR1
1047	E	ENSG00000234741	GAS5
1048	E	ENSG00000234745	HLA-B
1049	E	ENSG00000234949	#N/A
1050	E	ENSG00000235106	BRD3OS
1051	E	ENSG00000235172	LINC01366
1052	E	ENSG00000235191	NUCB1-AS1
1053	E	ENSG00000235568	NFAM1
1054	E	ENSG00000236552	RPL13AP5
1055	E	ENSG00000240005	#N/A
1056	E	ENSG00000240694	PNMA2
1057	E	ENSG00000241106	HLA-DOB
1058	E	ENSG00000241399	CD302
1059	E	ENSG00000243364	EFNA4
1060	E	ENSG00000244038	DDOST
1061	E	ENSG00000247095	MIR210HG
1062	E	ENSG00000249375	CASC11
1063	E	ENSG00000250722	SELENOP
1064	E	ENSG00000254285	KRT8P3
1065	E	ENSG00000255114	#N/A
1066	E	ENSG00000257038	ARHGEF17-AS1
1067	E	ENSG00000257261	#N/A
1068	E	ENSG00000257337	TNS2-AS1
1069	E	ENSG00000257342	#N/A
1070	E	ENSG00000257453	#N/A
1071	E	ENSG00000259291	ZNF710-AS1
1072	E	ENSG00000259803	SLC22A31
1073	E	ENSG00000260001	TGFBR3L
1074	E	ENSG00000261236	BOP1
1075	E	ENSG00000261594	TPBGL
1076	E	ENSG00000262831	#N/A
1077	E	ENSG00000265496	#N/A
1078	E	ENSG00000265749	#N/A
1079	E	ENSG00000265784	#N/A
1080	E	ENSG00000265972	TXNIP
1081	E	ENSG00000266265	KLF14
1082	E	ENSG00000266962	HSD17B1-AS1
1083	E	ENSG00000266978	#N/A
1084	E	ENSG00000267296	CEBPA-DT
1085	E	ENSG00000267601	#N/A
1086	E	ENSG00000267737	#N/A
1087	E	ENSG00000268858	LOC112268269
1088	E	ENSG00000269292	#N/A
1089	E	ENSG00000269934	LOC124904535
1090	E	ENSG00000270800	RPS10-NUDT3
1091	E	ENSG00000272405	#N/A
1092	E	ENSG00000272711	#N/A
1093	E	ENSG00000273117	#N/A
1094	E	ENSG00000273314	#N/A
1095	E	ENSG00000275074	NUDT18
1096	E	ENSG00000276386	#N/A
1097	E	ENSG00000277117	LOC102723996
1098	E	ENSG00000277631	PGM5P3-AS1
1099	E	ENSG00000278023	RDM1
1100	E	ENSG00000278834	#N/A
1101	E	ENSG00000279453	#N/A
1102	E	ENSG00000279689	#N/A
1103	E	ENSG00000279713	#N/A
1104	E	ENSG00000279982	#N/A
1105	E	ENSG00000281103	TRG-AS1
1106	E	ENSG00000284693	LINC02606
1107	E	ENSG00000285245	#N/A
1108	E	ENSG00000285570	#N/A
1109	E	ENSG00000287673	#N/A
1110	E	ENSG00000287935	LOC124902606
1111	E	ENSG00000288671	#N/A
1112	E	ENSG00000289021	#N/A
1113	E	ENSG00000290596	#N/A
1114	E	ENSG00000290920	ZDHHC8BP
1115	E	ENSG00000291053	CATSPER2P1
1116	E	ENSG00000291071	FAM86JP
1117	E	ENSG00000291087	CRYBB2P1
1118	E	ENSG00000291149	LOC154761
1119	E	ENSG00000291174	#N/A
1120	E	ENSG00000291186	#N/A
1121	E	ENSG00000293205	#N/A
1122	E	ENSG00000293241	#N/A
1123	E	ENSG00000293492	#N/A
1124	E	ENSG00000293503	#N/A
