# Supplementary material for: Lactate-induced H3K4me3 histone mark promotes PLOD1-driven prostate cancer invasion
Source: Research Square preprint supplement (doi:10.21203/rs.3.rs-7767481/v1), 2026-02-19
Supplement: Supplementary file 2 [file c3259152e98743006243ddf7.xlsx]

## Sheet: Sheet1
	baseMean	FC	absFC	log2FoldChange	lfcSE	stat	pvalue	padj	symbol	entrez	alias	EnsemblID
1	3673.09099061896	0.604944	1.65304	-0.725125	0.0370296	-19.5823	2.18909e-85	2.79935e-81	PABPC1L	80336	C20orf119	ENSG00000101104
2	15676.1352009573	0.65843	1.51876	-0.602898	0.0308141	-19.5656	3.03683e-85	2.79935e-81	MAFK	7975	NFE2U	ENSG00000198517
3	4392.42967364028	1.79642	1.79642	0.845125	0.0461167	18.3258	5.15297e-75	3.16667e-71	P4HA1	5033	P4HA	ENSG00000122884
4	1716.64852361158	0.51793	1.93076	-0.949171	0.0520699	-18.2288	3.05102e-74	1.40621e-70	#N/A	#N/A	#N/A	ENSG00000273230
5	5983.53416896862	1.55396	1.55396	0.635949	0.0352775	18.0271	1.19487e-72	4.40571e-69	CEMIP2	23670	TMEM2	ENSG00000135048
6	386.02977024061	0.367049	2.72443	-1.44596	0.0851254	-16.9862	1.03916e-64	3.19298e-61	ZDHHC11	79844	ZNF399	ENSG00000188818
7	6712.66178021606	1.91089	1.91089	0.934244	0.0550714	16.9642	1.51074e-64	3.97886e-61	BNIP3	664	HABON	ENSG00000176171
8	4066.30798553788	1.89952	1.89952	0.925636	0.0553463	16.7244	8.70125e-63	2.0052e-59	MT2A	4502	MT-2	ENSG00000125148
9	5371.06007392522	0.611966	1.63408	-0.708478	0.0430297	-16.4648	6.56326e-61	1.34445e-57	KHDC4	22889	BLOM7	ENSG00000132680
10	10245.2631538684	1.50553	1.50553	0.59027	0.0360921	16.3546	4.03573e-60	7.44028e-57	PLOD2	5352	BRKS2	ENSG00000152952
11	59379.150814267	1.54383	1.54383	0.626513	0.0388034	16.1458	1.21498e-58	2.03631e-55	GPRC5A	9052	GPCR5A	ENSG00000013588
12	951.573510308659	2.27832	2.27832	1.18797	0.0744247	15.962	2.34915e-57	3.60908e-54	PDK1	5163	PDK1	ENSG00000152256
13	11306.4289933103	1.38687	1.38687	0.471836	0.0305297	15.455	6.98225e-54	9.90191e-51	ITGA3	3675	CD49C	ENSG00000005884
14	2467.2254418633	0.641206	1.55956	-0.641141	0.0420482	-15.2478	1.7035e-52	2.24327e-49	ETNK1	55500	EKI	ENSG00000139163
15	2132.00834850306	0.603081	1.65815	-0.729576	0.049152	-14.8433	7.69336e-50	9.45565e-47	MICALL2	79778	JRAB	ENSG00000164877
16	618.828513857609	0.463097	2.15937	-1.11061	0.0764471	-14.5279	8.06824e-48	9.29663e-45	#N/A	#N/A	#N/A	ENSG00000255031
17	2557.97905372107	1.64796	1.64796	0.720679	0.0502272	14.3484	1.0906e-46	1.18272e-43	RHOB	388	ARH6	ENSG00000143878
18	3121.8559354609	0.651667	1.53453	-0.617794	0.0457149	-13.5141	1.29211e-41	1.32341e-38	DGKD	8527	DGK-delta	ENSG00000077044
19	2066.836058815	1.77985	1.77985	0.83176	0.0626522	13.2758	3.19737e-40	3.10246e-37	UCP2	7351	BMIQ4	ENSG00000175567
20	62469.0519563954	1.32588	1.32588	0.406945	0.0311687	13.0562	5.85678e-39	5.39878e-36	HSPA5	3309	BIP	ENSG00000044574
21	397.348865406904	0.471284	2.12186	-1.08533	0.0843224	-12.8712	6.53841e-38	5.7401e-35	DOK3	79930	DOKL	ENSG00000146094
22	3661.1909143853	0.665484	1.50267	-0.587524	0.045837	-12.8177	1.30548e-37	1.09399e-34	PGM5P2	595135	PGM5P2	ENSG00000290923
23	3071.93573054288	1.64665	1.64665	0.719535	0.0572963	12.5581	3.58678e-36	2.87504e-33	SLC16A3	9123	MCT 3	ENSG00000141526
24	6652.07229978156	1.59325	1.59325	0.671972	0.0535392	12.551	3.924e-36	3.01429e-33	PFKL	5211	ATP-PFK	ENSG00000141959
25	2956.7046075463	1.52252	1.52252	0.606464	0.048781	12.4324	1.74364e-35	1.28583e-32	CRABP2	1382	CRABP-II	ENSG00000143320
26	1138.9914561913	0.621161	1.60989	-0.68696	0.0557766	-12.3163	7.40387e-35	5.24991e-32	OSGIN1	29948	BDGI	ENSG00000140961
27	2361.04696262436	0.688785	1.45183	-0.537875	0.0440319	-12.2156	2.56667e-34	1.75256e-31	XRCC2	7516	FANCU	ENSG00000196584
28	3405.5918738367	1.37401	1.37401	0.45839	0.0377835	12.132	7.14749e-34	4.70611e-31	MYLK	4638	AAT7	ENSG00000065534
29	1758.12745002288	1.43557	1.43557	0.521628	0.0431415	12.0911	1.17727e-33	7.4842e-31	AK4	205	AK 4	ENSG00000162433
30	950.915271180367	0.603344	1.65743	-0.728946	0.0606584	-12.0172	2.88475e-33	1.77277e-30	GOLGA8B	440270	GOLGA5	ENSG00000215252
31	44984.0768803805	1.27322	1.27322	0.348482	0.0292323	11.9211	9.18641e-33	5.46324e-30	PDIA4	9601	ERP70	ENSG00000155660
32	4111.46305930628	1.3636	1.3636	0.447424	0.0375959	11.9009	1.17089e-32	6.74578e-30	CKAP4	10970	CLIMP-63	ENSG00000136026
33	2215.38920522766	0.561135	1.7821	-0.83358	0.0704976	-11.8242	2.92608e-32	1.63471e-29	CENATAC	338657	CCDC84	ENSG00000186166
34	2852.99592828926	1.51605	1.51605	0.600314	0.0508465	11.8064	3.61677e-32	1.96114e-29	TUBA1A	7846	B-ALPHA-1	ENSG00000167552
35	2480.25860053262	0.588421	1.69946	-0.76508	0.0650473	-11.7619	6.13447e-32	3.23129e-29	MAPK8IP3	23162	JIP-3	ENSG00000138834
36	5295.59716168154	0.681981	1.46632	-0.552196	0.047305	-11.6731	1.74937e-31	8.9587e-29	PHF10	55274	BAF45A	ENSG00000130024
37	518.559202436871	0.520481	1.9213	-0.942083	0.0810245	-11.6271	2.99962e-31	1.49462e-28	LOC102723566	102723566	LOC102723566	ENSG00000225032
38	4397.17816301715	1.4879	1.4879	0.573277	0.0499299	11.4816	1.63163e-30	7.916e-28	FSCN1	6624	FAN1	ENSG00000075618
39	5529.35071911887	1.37473	1.37473	0.459148	0.0400788	11.4561	2.19095e-30	1.0357e-27	COL18A1	80781	GLCC	ENSG00000182871
40	3597.1523067313	0.734755	1.361	-0.444665	0.0388309	-11.4513	2.31531e-30	1.06712e-27	PCID2	55795	F10	ENSG00000126226
41	1428.71894567477	0.640032	1.56242	-0.643783	0.0562907	-11.4368	2.73915e-30	1.23168e-27	TMEM147-AS1	100506469	TMEM147-AS1	ENSG00000236144
42	27580.853747427	1.58714	1.58714	0.66643	0.0585443	11.3833	5.06258e-30	2.22223e-27	LDHA	3939	GSD11	ENSG00000134333
43	986.952215521877	1.53481	1.53481	0.618064	0.0543106	11.3802	5.25014e-30	2.25097e-27	PFKFB4	5210	PFKFB4	ENSG00000114268
44	3597.4727060185	0.617093	1.6205	-0.696439	0.0615705	-11.3113	1.15418e-29	4.836e-27	CCNL2	81669	ANIA-6B	ENSG00000221978
45	7594.05978967398	0.552385	1.81033	-0.856255	0.0758962	-11.2819	1.61186e-29	6.60359e-27	NR4A3	8013	CHN	ENSG00000119508
46	220.762564929157	0.412964	2.42152	-1.27591	0.113594	-11.2322	2.83412e-29	1.13587e-26	#N/A	#N/A	#N/A	ENSG00000285816
47	47232.7442664546	1.22972	1.22972	0.298335	0.0265913	11.2193	3.27996e-29	1.28658e-26	HSP90B1	7184	ECGP	ENSG00000166598
48	2715.51998435531	1.37499	1.37499	0.459423	0.0411765	11.1574	6.58801e-29	2.53034e-26	CELF2	10659	BRUNOL3	ENSG00000048740
49	3051.78158923461	0.706218	1.41599	-0.501815	0.0453341	-11.0692	1.76878e-28	6.52186e-26	KEAP1	9817	INrf2	ENSG00000079999
50	965.03298615792	2.02559	2.02559	1.01834	0.0919908	11.0701	1.75281e-28	6.52186e-26	MT1E	4493	MT-1E	ENSG00000169715
51	18982.6093133738	1.4678	1.4678	0.553659	0.0504883	10.9661	5.56314e-28	2.01102e-25	CCN1	3491	CYR61	ENSG00000142871
52	12692.1641759691	1.47217	1.47217	0.557941	0.050896	10.9624	5.79534e-28	2.05467e-25	ANKRD1	27063	ALRP	ENSG00000148677
53	28400.8538217297	1.26392	1.26392	0.337902	0.0308632	10.9484	6.76504e-28	2.35321e-25	PDIA6	10130	ERP5	ENSG00000143870
54	1025.82808430762	0.659657	1.51594	-0.600212	0.0551149	-10.8902	1.2835e-27	4.38198e-25	CLDN15	24146	CLDN15	ENSG00000106404
55	9319.93882170341	1.38507	1.38507	0.469963	0.0431894	10.8815	1.41289e-27	4.73601e-25	BNIP3L	665	BNIP3a	ENSG00000104765
56	1951.87598910749	0.674391	1.48282	-0.568343	0.0523289	-10.861	1.76868e-27	5.82274e-25	ZNF276	92822	CENP-Z	ENSG00000158805
57	9475.83217370522	0.783825	1.2758	-0.351397	0.0324389	-10.8326	2.41217e-27	7.80189e-25	JADE2	23338	JADE-2	ENSG00000043143
58	5059.8683022566	1.35364	1.35364	0.436847	0.040342	10.8286	2.52032e-27	8.01115e-25	SEMA4B	10509	SEMAC	ENSG00000185033
59	2027.35763969621	1.38564	1.38564	0.470548	0.0435201	10.8122	3.01323e-27	9.41557e-25	P4HA2	8974	MYP25	ENSG00000072682
60	416.711856448618	0.547474	1.82657	-0.869138	0.0804392	-10.8049	3.26268e-27	1.00251e-24	#N/A	#N/A	#N/A	ENSG00000230325
61	6323.42445966301	1.36445	1.36445	0.448321	0.041542	10.792	3.75619e-27	1.13523e-24	PPDPF	79144	C20orf149	ENSG00000125534
62	503.576487658071	0.50796	1.96866	-0.977213	0.0905931	-10.7868	3.97222e-27	1.18116e-24	PAQR6	79957	PRdelta	ENSG00000160781
63	3853.57186835807	1.33885	1.33885	0.420997	0.0391144	10.7632	5.13412e-27	1.50242e-24	BCKDK	10295	BCKDKD	ENSG00000103507
64	429.693592722711	1.96584	1.96584	0.975146	0.0908042	10.739	6.67638e-27	1.92321e-24	KLF2	10365	LKLF	ENSG00000127528
65	628.57620050414	0.540813	1.84907	-0.886798	0.0826123	-10.7345	7.01235e-27	1.98892e-24	VAMP1	6843	CMS25	ENSG00000139190
66	10522.6857221125	0.794392	1.25882	-0.332077	0.0309947	-10.714	8.74916e-27	2.44393e-24	RBM39	9584	CAPER	ENSG00000131051
67	604.112055673518	0.595282	1.67988	-0.748356	0.0700736	-10.6796	1.26862e-26	3.49078e-24	#N/A	#N/A	#N/A	ENSG00000227671
68	2171.81658292738	1.4682	1.4682	0.554052	0.052014	10.652	1.70715e-26	4.62839e-24	ADAMTSL4	54507	ADAMTSL-4	ENSG00000143382
69	2405.68631193982	0.73385	1.36268	-0.446444	0.0419247	-10.6487	1.76809e-26	4.72414e-24	CCNL1	57018	ANIA6A	ENSG00000163660
70	815.782194743913	0.634002	1.57728	-0.65744	0.0618826	-10.624	2.30509e-26	6.07094e-24	SLC1A3	6507	EA6	ENSG00000079215
71	609.478853333279	1.67563	1.67563	0.744703	0.0702436	10.6017	2.92532e-26	7.59596e-24	SPINT1	6692	HAI	ENSG00000166145
72	33710.2075644999	1.28227	1.28227	0.358702	0.0339506	10.5654	4.31049e-26	1.10373e-23	P4HB	5034	CLCRP1	ENSG00000185624
73	3578.38751718242	0.759215	1.31715	-0.39742	0.0376343	-10.5601	4.56405e-26	1.15264e-23	USP36	57602	DUB1	ENSG00000055483
74	1676.56400178551	0.593775	1.68414	-0.752011	0.0725495	-10.3655	3.55923e-25	8.86729e-23	RSRP1	57035	C1orf63	ENSG00000117616
75	2978.2086065613	0.728696	1.37231	-0.456611	0.044228	-10.324	5.48634e-25	1.34862e-22	CCDC14	64770	CCDC14	ENSG00000175455
76	1939.47367003109	0.726791	1.37591	-0.460388	0.0446864	-10.3026	6.85488e-25	1.66285e-22	EZH1	2145	KMT6B	ENSG00000108799
77	307.623990503632	0.492672	2.02975	-1.0213	0.0991597	-10.2996	7.07902e-25	1.69492e-22	AOC2	314	DAO2	ENSG00000131480
78	329.655563500133	0.512596	1.95085	-0.964106	0.0938882	-10.2687	9.7554e-25	2.30578e-22	FBXL19-AS1	283932	NCRNA00095	ENSG00000260852
79	14359.2388933424	1.28601	1.28601	0.362901	0.0353635	10.262	1.04494e-24	2.43854e-22	MAGED1	9500	DLXIN-1	ENSG00000179222
80	952.905700404403	0.647457	1.5445	-0.627143	0.061176	-10.2515	1.16571e-24	2.68639e-22	IL18BP	10068	FVH	ENSG00000137496
81	3094.55224168733	0.755636	1.32339	-0.404236	0.0394619	-10.2437	1.26315e-24	2.875e-22	PRPF3	9129	HPRP3	ENSG00000117360
82	9250.7386028234	1.24791	1.24791	0.319514	0.0312683	10.2185	1.63913e-24	3.68525e-22	ANXA6	309	ANX6	ENSG00000197043
83	16302.1269683259	1.32226	1.32226	0.403009	0.0395984	10.1774	2.5014e-24	5.55612e-22	TRAM1	23471	PNAS8	ENSG00000067167
84	1049.95045523	0.636628	1.57078	-0.651477	0.0641431	-10.1566	3.09602e-24	6.79504e-22	ACYP1	97	ACYPE	ENSG00000119640
85	1085.80800541	1.6351	1.6351	0.709376	0.0699259	10.1447	3.49914e-24	7.58943e-22	APOE	348	AD2	ENSG00000130203
86	1974.89801851596	0.569714	1.75527	-0.811689	0.0801511	-10.127	4.19383e-24	8.9904e-22	LUCAT1	100505994	SCAL1	ENSG00000248323
87	4867.25676166965	0.790779	1.26458	-0.338653	0.033449	-10.1244	4.30408e-24	9.1207e-22	OGT	8473	HINCUT-1	ENSG00000147162
88	6745.86217556147	0.7739	1.29216	-0.369782	0.0366038	-10.1023	5.39824e-24	1.13093e-21	CCAR1	55749	CCAR1	ENSG00000060339
89	510.908706687264	0.556023	1.79849	-0.846784	0.0843082	-10.0439	9.77263e-24	2.02436e-21	LTB4R	1241	BLT1	ENSG00000213903
90	11048.9677264965	1.24783	1.24783	0.319416	0.0320213	9.97513	1.9585e-23	4.01189e-21	KLHL5	51088	KLHL5	ENSG00000109790
91	423.044064206628	0.541926	1.84527	-0.883832	0.088704	-9.96383	2.19433e-23	4.44557e-21	#N/A	#N/A	#N/A	ENSG00000285589
92	329.173181349473	0.483817	2.0669	-1.04747	0.105505	-9.92816	3.14e-23	6.29228e-21	#N/A	#N/A	#N/A	ENSG00000293499
93	621.054763969389	0.595625	1.67891	-0.747524	0.075334	-9.9228	3.31312e-23	6.56782e-21	#N/A	#N/A	#N/A	ENSG00000269352
94	135.103887461881	0.370692	2.69766	-1.43171	0.144685	-9.89533	4.36189e-23	8.55487e-21	BNIPL	149428	BNIP-S	ENSG00000163141
95	1747.7735374142	1.44434	1.44434	0.530407	0.0536921	9.87869	5.15028e-23	9.9948e-21	SEMA4G	57715	SEMA4G	ENSG00000095539
96	1337.67490933816	1.91957	1.91957	0.940781	0.0955417	9.84681	7.07569e-23	1.35883e-20	HK2	3099	HKII	ENSG00000159399
97	2333.82637553842	1.46339	1.46339	0.549316	0.0560095	9.80754	1.04483e-22	1.98582e-20	MPI	4351	CDG1B	ENSG00000178802
98	7161.88862446005	1.30944	1.30944	0.388948	0.0396879	9.80015	1.12419e-22	2.11485e-20	DDX42	11325	DDX42P	ENSG00000198231
99	514.30299182242	1.66277	1.66277	0.733585	0.0749777	9.78404	1.3184e-22	2.45516e-20	HLA-DPA1	3113	DP(W3)	ENSG00000231389
100	8364.15635080992	1.26071	1.26071	0.334239	0.0341957	9.77428	1.45181e-22	2.67656e-20	CRIM1	51232	CRIM-1	ENSG00000150938
101	599.276018489178	0.577186	1.73255	-0.792893	0.0812195	-9.76235	1.6333e-22	2.98134e-20	THUMPD3-AS1	440944	SETD5-AS1	ENSG00000206573
102	2234.10008639233	0.743856	1.34435	-0.426905	0.0438931	-9.72601	2.33577e-22	4.22179e-20	NKTR	4820	p104	ENSG00000114857
103	1921.19406660243	0.683624	1.46279	-0.548725	0.0569185	-9.64055	5.39008e-22	9.64773e-20	TTC14	151613	DRDL5813	ENSG00000163728
104	5947.82740580354	0.764593	1.30789	-0.387236	0.0404662	-9.56936	1.07574e-21	1.90695e-19	PNN	5411	DRS	ENSG00000100941
105	7360.28493342799	0.785638	1.27285	-0.348063	0.0364774	-9.54187	1.4028e-21	2.46305e-19	UBR4	23352	RBAF600	ENSG00000127481
106	2641.74788648838	1.58037	1.58037	0.660265	0.0692595	9.53322	1.52481e-21	2.65202e-19	IVNS1ABP	10625	ARA3	ENSG00000116679
107	14966.6857466968	1.3095	1.3095	0.389016	0.0409472	9.50043	2.09033e-21	3.60163e-19	ICAM1	3383	BB2	ENSG00000090339
108	3591.7301463127	0.726876	1.37575	-0.460219	0.0485392	-9.48138	2.50932e-21	4.28349e-19	LENG8	114823	pp13842	ENSG00000167615
109	1270.34721908304	0.604516	1.65422	-0.726148	0.0765993	-9.47983	2.54709e-21	4.30808e-19	CHKA	1119	CHK	ENSG00000110721
110	1812.65937719603	1.51406	1.51406	0.598419	0.0632256	9.46482	2.9408e-21	4.92877e-19	SPOCK1	6695	SPOCK	ENSG00000152377
111	1815.31121355398	1.35272	1.35272	0.435861	0.0460699	9.46086	3.05414e-21	5.07262e-19	NPTX2	4885	NARP	ENSG00000106236
112	4158.03691990556	1.62143	1.62143	0.697269	0.0737661	9.45243	3.31056e-21	5.44459e-19	MRC2	9902	CD280	ENSG00000011028
113	733.874264737116	0.651974	1.5338	-0.617113	0.065292	-9.45159	3.33716e-21	5.44459e-19	RRP7BP	91695	RRP7B	ENSG00000291035
114	3281.63146932434	0.740881	1.34974	-0.432687	0.0457975	-9.44783	3.45923e-21	5.59424e-19	RUBCN	9711	KIAA0226	ENSG00000145016
115	5673.72694790686	1.27411	1.27411	0.34949	0.0370421	9.43494	3.91226e-21	6.27186e-19	XPR1	9213	IBGC6	ENSG00000143324
116	212.477721591591	2.30821	2.30821	1.20678	0.128174	9.41518	4.72263e-21	7.50573e-19	CLIC3	9022	CLIC3	ENSG00000169583
117	129.639006515455	0.337944	2.95907	-1.56514	0.166678	-9.39019	5.9891e-21	9.43718e-19	PRORP	9692	COXPD54	ENSG00000258790
118	1305.69516154572	0.679925	1.47075	-0.556553	0.059613	-9.3361	9.99501e-21	1.56159e-18	#N/A	#N/A	#N/A	ENSG00000234072
119	25014.0060645746	1.22166	1.22166	0.288846	0.0310026	9.31682	1.19878e-20	1.8572e-18	NUCKS1	64710	JC7	ENSG00000069275
120	2114.5685712947	0.721261	1.38646	-0.471407	0.0507367	-9.29124	1.52496e-20	2.34284e-18	ZNF83	55769	HPF1	ENSG00000167766
121	3842.78461284113	1.28421	1.28421	0.360885	0.0388651	9.28559	1.60811e-20	2.45017e-18	SERPINH1	871	AsTP3	ENSG00000149257
122	6884.63660413913	1.24573	1.24573	0.316995	0.0341451	9.28377	1.63593e-20	2.47213e-18	TNIP1	10318	ABIN-1	ENSG00000145901
123	4091.95234674411	0.785305	1.27339	-0.348676	0.0377231	-9.24303	2.39609e-20	3.59141e-18	JOSD1	9929	dJ508I15.2	ENSG00000100221
124	32704.6389829508	1.19825	1.19825	0.260929	0.0282495	9.23661	2.54426e-20	3.78275e-18	CALU	813	CALU	ENSG00000128595
125	1546.09845776263	0.72516	1.37901	-0.463628	0.0502898	-9.21913	2.99522e-20	4.41759e-18	WASHC1	100287171	FAM39E	ENSG00000181404
126	2053.26523429721	1.32308	1.32308	0.403897	0.0438774	9.20513	3.41249e-20	4.99306e-18	VLDLR	7436	CAMRQ1	ENSG00000147852
127	4311.65688901046	0.583959	1.71245	-0.776061	0.0844276	-9.19203	3.85495e-20	5.59605e-18	NR4A2	4929	HZF-3	ENSG00000153234
128	2634.14423665494	0.693394	1.44218	-0.528253	0.0575416	-9.18037	4.29629e-20	6.18801e-18	PAXBP1	94104	BM020	ENSG00000159086
129	9539.68326009236	1.27219	1.27219	0.347309	0.0379696	9.14705	5.85106e-20	8.36203e-18	NF2	4771	ACN	ENSG00000186575
130	300.706024405732	0.470221	2.12666	-1.08859	0.119385	-9.11828	7.63251e-20	1.08241e-17	#N/A	#N/A	#N/A	ENSG00000262580
131	2112.6868448564	1.50197	1.50197	0.586858	0.0643747	9.11629	7.77396e-20	1.09405e-17	DDIT4	54541	Dig2	ENSG00000168209
132	1710.44598839608	0.752356	1.32916	-0.410513	0.0451012	-9.10204	8.86486e-20	1.23813e-17	NADSYN1	55191	VCRL3	ENSG00000172890
133	124.967837142039	2.41552	2.41552	1.27233	0.140106	9.08121	1.07376e-19	1.48496e-17	LOX	4015	AAT10	ENSG00000113083
134	4433.41247482074	0.710616	1.40723	-0.492857	0.0542756	-9.08065	1.07932e-19	1.48496e-17	ZNF121	7675	D19S204	ENSG00000197961
135	832.220687420957	1.58319	1.58319	0.662834	0.0730499	9.07372	1.15024e-19	1.55688e-17	WDR54	84058	WDR54	ENSG00000005448
136	793.14159804142	1.65224	1.65224	0.72442	0.0798334	9.07414	1.14578e-19	1.55688e-17	ID1	3397	ID	ENSG00000125968
137	3404.08057026812	1.41836	1.41836	0.504224	0.0555736	9.07309	1.15694e-19	1.55688e-17	CLDN1	9076	CLD1	ENSG00000163347
138	15751.3299028198	1.19467	1.19467	0.256607	0.0283411	9.05424	1.37521e-19	1.8372e-17	ACADVL	37	ACAD6	ENSG00000072778
139	624.955983895941	1.58123	1.58123	0.661047	0.0730248	9.05236	1.39909e-19	1.85566e-17	NUDT18	79873	MTH3	ENSG00000275074
140	6240.63535748781	0.774151	1.29174	-0.369314	0.0409804	-9.01196	2.02405e-19	2.66538e-17	KIFC3	3801	KIFC3	ENSG00000140859
141	11477.62858669	1.20745	1.20745	0.271963	0.030191	9.00808	2.09699e-19	2.74185e-17	DBN1	1627	D0S117E	ENSG00000113758
142	773.717591496194	1.56637	1.56637	0.647426	0.0719265	9.00122	2.23228e-19	2.89819e-17	IER5L	389792	bA247A12.2	ENSG00000188483
143	3831.49719069594	0.742849	1.34617	-0.428859	0.0476663	-8.99711	2.31738e-19	2.98764e-17	NISCH	11188	I-1	ENSG00000010322
144	1824.75033057432	0.734749	1.36101	-0.444677	0.0495478	-8.9747	2.84128e-19	3.63763e-17	#N/A	#N/A	#N/A	ENSG00000225138
145	2751.11237106008	0.760933	1.31418	-0.394159	0.0439402	-8.97036	2.95558e-19	3.75006e-17	ANKRD12	23253	ANCO-2	ENSG00000101745
146	4070.75284013081	0.789316	1.26692	-0.341325	0.0380526	-8.96983	2.96978e-19	3.75006e-17	CREBZF	58487	SMILE	ENSG00000137504
147	592.932110149731	0.608853	1.64243	-0.715834	0.079848	-8.96496	3.10401e-19	3.89289e-17	#N/A	#N/A	#N/A	ENSG00000205740
148	1289.59097258404	1.48186	1.48186	0.567408	0.0633247	8.96029	3.23826e-19	4.03382e-17	CTXN1	404217	CTXN	ENSG00000178531
149	1572.97472732154	1.36546	1.36546	0.449383	0.0504195	8.91287	4.97261e-19	6.15269e-17	FUT11	170384	FUCTXI	ENSG00000196968
150	296.89681264351	0.537982	1.8588	-0.894371	0.100414	-8.90686	5.24987e-19	6.45244e-17	WNK4	65266	PHA2B	ENSG00000126562
151	367.897527421875	0.590011	1.69488	-0.761186	0.0857954	-8.8721	7.17785e-19	8.76363e-17	#N/A	#N/A	#N/A	ENSG00000246889
152	875.711158483407	0.633165	1.57937	-0.659348	0.0743548	-8.86759	7.47488e-19	9.06624e-17	HOTAIRM1	100506311	HOXA-AS1	ENSG00000233429
153	458.380092097518	0.543124	1.8412	-0.880647	0.0997346	-8.82991	1.04762e-18	1.26234e-16	#N/A	#N/A	#N/A	ENSG00000225450
154	1720.57437653379	0.736415	1.35793	-0.441408	0.0499943	-8.82917	1.05456e-18	1.26246e-16	ING5	84289	p28ING5	ENSG00000168395
155	4567.16409932155	1.29025	1.29025	0.367649	0.0416465	8.82784	1.06721e-18	1.26936e-16	GAA	2548	LYAG	ENSG00000171298
156	15953.6990480104	1.18138	1.18138	0.240476	0.0272653	8.81987	1.14594e-18	1.35427e-16	LMAN1	3998	ERGIC-53	ENSG00000074695
157	10191.8515405785	1.23982	1.23982	0.310131	0.0352146	8.80688	1.2868e-18	1.51104e-16	PLD3	23646	AD19	ENSG00000105223
158	8621.16264080935	1.31693	1.31693	0.39718	0.0451081	8.80508	1.30761e-18	1.52577e-16	COL6A2	1292	BTHLM1	ENSG00000142173
159	1775.05888766433	0.687657	1.45421	-0.54024	0.0614625	-8.78974	1.49907e-18	1.73817e-16	NBR2	10230	NCRNA00192	ENSG00000198496
160	227.145950136121	0.464059	2.1549	-1.10762	0.126286	-8.77072	1.77529e-18	2.04558e-16	#N/A	#N/A	#N/A	ENSG00000240291
161	382.134043657998	0.564611	1.77113	-0.824672	0.0940731	-8.76629	1.84645e-18	2.10537e-16	#N/A	#N/A	#N/A	ENSG00000262660
162	51.380010588711	0.172502	5.79703	-2.53531	0.289219	-8.76608	1.85002e-18	2.10537e-16	#N/A	#N/A	#N/A	ENSG00000279821
163	1515.82328959045	1.47994	1.47994	0.565542	0.0645351	8.76332	1.89589e-18	2.14433e-16	TNNT1	7138	ANM	ENSG00000105048
164	21925.6378495884	1.61355	1.61355	0.690235	0.0787983	8.75951	1.96095e-18	2.20439e-16	KRT18	3875	CK-18	ENSG00000111057
165	6496.52565052505	1.2074	1.2074	0.271898	0.0311047	8.74139	2.30252e-18	2.57268e-16	COPZ1	22818	CGI-120	ENSG00000111481
166	7655.9569690996	1.25676	1.25676	0.329707	0.0378567	8.70934	3.0565e-18	3.39456e-16	HK1	3098	HK	ENSG00000156515
167	4388.04089287935	1.23679	1.23679	0.306601	0.0353072	8.68381	3.82733e-18	4.22519e-16	CSRP1	1465	CRP	ENSG00000159176
168	1402.62052762697	0.717714	1.39331	-0.47852	0.0552836	-8.65572	4.8979e-18	5.37486e-16	SYNJ1	8867	DEE53	ENSG00000159082
169	6059.12066354095	1.24227	1.24227	0.312982	0.036221	8.6409	5.5774e-18	6.08432e-16	KIAA1191	57179	p33MONOX	ENSG00000122203
170	5420.01905370298	1.27194	1.27194	0.347035	0.0402549	8.62095	6.64025e-18	7.20116e-16	PLOD1	5351	EDS6	ENSG00000083444
171	5651.29073060605	1.32599	1.32599	0.407065	0.0472411	8.61675	6.88819e-18	7.42635e-16	NIPSNAP1	8508	NIPSNAP1	ENSG00000184117
172	3040.63129027732	0.762364	1.31171	-0.391449	0.0454707	-8.60882	7.38162e-18	7.91207e-16	OSER1	51526	C20orf111	ENSG00000132823
173	780.915438551745	0.683223	1.46365	-0.549572	0.0638539	-8.6067	7.51951e-18	8.01327e-16	SLFNL1-AS1	100507178	SLFNL1-AS1	ENSG00000281207
174	3360.14131092528	1.29274	1.29274	0.370428	0.0430508	8.60445	7.66824e-18	8.12481e-16	LOXL2	4017	LOR	ENSG00000134013
175	899.367108586479	1.41499	1.41499	0.500787	0.0585649	8.55098	1.22051e-17	1.28579e-15	HDDC3	374659	(ppGpp)ase	ENSG00000184508
176	1028.22322410896	0.683882	1.46224	-0.548181	0.0641495	-8.54536	1.28138e-17	1.34224e-15	L3HYPDH	112849	C14orf149	ENSG00000126790
177	696.293570436997	1.48051	1.48051	0.566094	0.0662806	8.54086	1.33223e-17	1.38763e-15	DGAT1	8694	ARAT	ENSG00000185000
178	2739.25990532227	1.34441	1.34441	0.426969	0.0501465	8.51444	1.67402e-17	1.73383e-15	RWDD2B	10069	C21orf6	ENSG00000156253
179	195.798774458674	0.450153	2.22147	-1.15151	0.135583	-8.49303	2.01325e-17	2.07354e-15	KCND1	3750	KV4.1	ENSG00000102057
180	5220.48771549509	1.22449	1.22449	0.292186	0.0345212	8.46396	2.58448e-17	2.64708e-15	FOSL2	2355	FRA2	ENSG00000075426
181	1519.67786378562	0.711968	1.40456	-0.490115	0.0581911	-8.42251	3.68508e-17	3.75349e-15	MPPE1	65258	Cdc1	ENSG00000154889
182	4951.63438719118	0.82272	1.21548	-0.281527	0.033429	-8.42165	3.71205e-17	3.76019e-15	PRPF4B	8899	PR4H	ENSG00000112739
183	1689.72072513877	1.53635	1.53635	0.61951	0.0736147	8.41558	3.90969e-17	3.93875e-15	NDRG1	10397	CAP43	ENSG00000104419
184	1277.31690931915	0.693934	1.44106	-0.52713	0.0626912	-8.40837	4.15762e-17	4.16575e-15	CABLES1	91768	CABL1	ENSG00000134508
185	4254.73867510867	1.29512	1.29512	0.373083	0.0444475	8.39379	4.70712e-17	4.69084e-15	TM7SF2	7108	ANG1	ENSG00000149809
186	257.081358937432	0.510844	1.95754	-0.969045	0.116136	-8.34404	7.17945e-17	7.11614e-15	INO80B-WBP1	100532735	INO80B-WBP1	ENSG00000274049
187	1595.97070948705	1.40998	1.40998	0.495672	0.0594149	8.34256	7.27018e-17	7.16755e-15	MDK	4192	ARAP	ENSG00000110492
188	873.300467907848	0.674793	1.48194	-0.567483	0.0680402	-8.3404	7.40398e-17	7.26063e-15	GOLGA8A	23015	CFAP286	ENSG00000175265
189	349.148430321991	0.593428	1.68513	-0.752856	0.0903036	-8.33694	7.62402e-17	7.42085e-15	FBXO43	286151	EMI2	ENSG00000156509
190	153.366968207698	0.425552	2.34989	-1.23259	0.147854	-8.33657	7.64787e-17	7.42085e-15	#N/A	#N/A	#N/A	ENSG00000288612
191	5345.08621021294	1.27797	1.27797	0.353856	0.0424688	8.33215	7.9387e-17	7.66272e-15	MAP1B	4131	DFNA83	ENSG00000131711
192	8716.49649267347	1.2479	1.2479	0.3195	0.0383508	8.33099	8.01699e-17	7.69798e-15	RRBP1	6238	ES/130	ENSG00000125844
193	2564.58806807615	0.687199	1.45518	-0.541199	0.0649807	-8.32862	8.17899e-17	7.81284e-15	ANKRD10	55608	ANKRD10	ENSG00000088448
194	2627.8683029333	0.796642	1.25527	-0.327997	0.039438	-8.31679	9.03759e-17	8.58851e-15	ESPL1	9700	ESP1	ENSG00000135476
195	589.013760785754	0.677769	1.47543	-0.561134	0.0676919	-8.28953	1.13698e-16	1.07494e-14	CRNDE	643911	CRNDEP	ENSG00000245694
196	45.3949627222047	4.68985	4.68985	2.22954	0.269426	8.27517	1.28275e-16	1.20657e-14	CYP1A2	1544	CP12	ENSG00000140505
197	717.779740792557	0.560759	1.7833	-0.834546	0.100885	-8.27229	1.31414e-16	1.22982e-14	CHRNE	1145	ACHRE	ENSG00000108556
198	3875.84806549222	0.736856	1.35712	-0.440546	0.0533693	-8.25468	1.52314e-16	1.41821e-14	PNISR	25957	C6orf111	ENSG00000132424
199	264.155294580053	0.552461	1.81008	-0.856056	0.104217	-8.21418	2.13615e-16	1.97899e-14	TRPV1	7442	VR1	ENSG00000196689
200	752.64211015988	0.558718	1.78981	-0.839808	0.102346	-8.20562	2.29411e-16	2.11471e-14	CTSK	1513	CTS02	ENSG00000143387
201	3898.64382915594	1.23553	1.23553	0.305128	0.0371882	8.20497	2.30642e-16	2.11548e-14	IDH2	3418	D2HGA2	ENSG00000182054
202	426.198012723647	0.606672	1.64834	-0.721011	0.087924	-8.20038	2.39629e-16	2.18703e-14	LINC02043	102724699	LINC02043	ENSG00000232233
203	5423.35741581736	1.26904	1.26904	0.343741	0.0419306	8.19786	2.44706e-16	2.22237e-14	GPC1	2817	glypican	ENSG00000063660
204	916.617813593059	0.575563	1.73743	-0.796955	0.097364	-8.18531	2.71608e-16	2.45459e-14	SALL4	57167	DRRS	ENSG00000101115
205	6092.22943694578	0.780282	1.28159	-0.357933	0.0437736	-8.17693	2.91174e-16	2.61858e-14	GIGYF1	64599	GYF1	ENSG00000146830
206	11539.0386939309	1.45751	1.45751	0.543508	0.066559	8.16581	3.19288e-16	2.85748e-14	PGK1	5230	HEL-S-68p	ENSG00000102144
207	116.36077308188	0.338615	2.95321	-1.56228	0.19134	-8.16496	3.21537e-16	2.8637e-14	GARIN1A	346653	FAM137B	ENSG00000205085
208	505.728111718222	0.607698	1.64555	-0.718573	0.0880176	-8.16396	3.24215e-16	2.87367e-14	TRAF1	7185	EBI6	ENSG00000056558
209	229.836992150042	0.402023	2.48742	-1.31465	0.161067	-8.16211	3.2923e-16	2.90416e-14	#N/A	#N/A	#N/A	ENSG00000234771
210	1132.23962539625	0.66606	1.50137	-0.586276	0.0718773	-8.15662	3.44519e-16	3.02449e-14	ATAD3B	83858	AAA-TOB3	ENSG00000160072
211	3570.99890598434	1.3335	1.3335	0.41522	0.0509094	8.15605	3.46153e-16	3.02449e-14	FGFR4	2264	CD334	ENSG00000160867
212	76.3734198201785	2.84206	2.84206	1.50694	0.185369	8.12939	4.31438e-16	3.75189e-14	MIR210HG	100506211	MIR210HG	ENSG00000247095
213	13071.5126403198	1.22146	1.22146	0.288608	0.0355205	8.1251	4.46977e-16	3.86877e-14	NAMPT	10135	1110035O14Rik	ENSG00000105835
214	722.878969771232	0.5691	1.75716	-0.813247	0.100212	-8.11525	4.84803e-16	4.17655e-14	#N/A	#N/A	#N/A	ENSG00000290791
215	27098.5447017779	1.22051	1.22051	0.287482	0.0354495	8.10963	5.07761e-16	4.35399e-14	PDIA3	2923	ER60	ENSG00000167004
216	15723.8635801442	1.38764	1.38764	0.472629	0.0583161	8.1046	5.29192e-16	4.51675e-14	PGAM1	5223	HEL-S-35	ENSG00000171314
217	1906.99024028353	0.728448	1.37278	-0.457101	0.0564924	-8.09137	5.89956e-16	5.01218e-14	CPNE7	27132	CPNE7	ENSG00000178773
218	437.314967051456	1.61112	1.61112	0.688066	0.0850852	8.08679	6.12576e-16	5.18048e-14	CLUAP1	23059	CFAP22	ENSG00000103351
219	1131.65186727918	0.713549	1.40145	-0.486916	0.0602231	-8.0852	6.20621e-16	5.22455e-14	NABP1	64859	NABP1-OT1	ENSG00000173559
220	1974.57821842524	0.709592	1.40926	-0.494938	0.0612418	-8.0817	6.38687e-16	5.3522e-14	STK11	6794	LKB1	ENSG00000118046
221	2141.26833015827	0.756637	1.32164	-0.402328	0.0498003	-8.07881	6.53994e-16	5.45567e-14	INPPL1	3636	OPSMD	ENSG00000165458
222	3762.80270545354	1.55227	1.55227	0.634382	0.0786042	8.07059	6.99577e-16	5.80964e-14	SLC2A1	6513	CSE	ENSG00000117394
223	10942.9064505741	1.20021	1.20021	0.263286	0.0326269	8.0696	7.05267e-16	5.83063e-14	HMGCS1	3157	HMGCS	ENSG00000112972
224	15563.3272253949	1.28969	1.28969	0.367025	0.0455014	8.06624	7.24956e-16	5.96665e-14	AGRN	375790	AGRIN	ENSG00000188157
225	531.146765639509	0.474724	2.10649	-1.07484	0.133438	-8.05498	7.94935e-16	6.51352e-14	RAD51-AS1	100505648	TODRA	ENSG00000245849
226	5328.26524953344	1.22573	1.22573	0.293637	0.0364677	8.05197	8.14708e-16	6.646e-14	ZNF217	7764	ZABC1	ENSG00000171940
227	2783.06851908386	1.26371	1.26371	0.337667	0.0419503	8.04922	8.33243e-16	6.76726e-14	DUSP1	1843	CL100	ENSG00000120129
228	112.010238429837	0.407163	2.45602	-1.29632	0.161105	-8.04646	8.52199e-16	6.89085e-14	#N/A	#N/A	#N/A	ENSG00000266994
229	2685.15319558123	1.29161	1.29161	0.369172	0.0459839	8.02829	9.88369e-16	7.92242e-14	ACSS2	55902	ACAS2	ENSG00000131069
230	502.089282443823	0.636111	1.57205	-0.65265	0.081291	-8.02857	9.86193e-16	7.92242e-14	SNHG26	109729180	SNHG26	ENSG00000228649
231	635.984680644228	0.637354	1.56899	-0.649833	0.0811147	-8.01128	1.13525e-15	9.06039e-14	CSAD	51380	CSD	ENSG00000139631
232	1576.78289123348	1.31532	1.31532	0.395416	0.0493727	8.00881	1.15828e-15	9.20431e-14	DNAJC14	85406	DNAJ	ENSG00000135392
233	208.681766651217	1.84154	1.84154	0.880911	0.110202	7.99357	1.3109e-15	1.03724e-13	PTP4A3	11156	PRL-3	ENSG00000184489
234	231.061786469409	0.527149	1.897	-0.923717	0.115791	-7.97743	1.49412e-15	1.17716e-13	ARHGAP27P1-BPTFP1-KPNA2P3	109286553	ARHGAP27P1-BPTFP1-KPNA2P3	ENSG00000215769
235	5528.27029128953	1.20095	1.20095	0.264178	0.0331194	7.97651	1.50525e-15	1.18089e-13	LATS2	26524	KPM	ENSG00000150457
236	344.536458153282	0.580153	1.72368	-0.785494	0.0985128	-7.97353	1.54211e-15	1.20467e-13	#N/A	#N/A	#N/A	ENSG00000288559
237	292.95767472479	0.525871	1.90161	-0.927218	0.11636	-7.96852	1.60588e-15	1.2492e-13	LOC112268239	112268239	LOC112268239	ENSG00000288880
238	2762.906934348	1.2858	1.2858	0.362663	0.0455289	7.96557	1.64469e-15	1.27402e-13	NRSN2	80023	C20orf98	ENSG00000125841
239	18265.0522888184	1.24826	1.24826	0.31992	0.04021	7.95623	1.77362e-15	1.36814e-13	ASPH	444	AAH	ENSG00000198363
240	2095.92481961757	1.43875	1.43875	0.52482	0.0661409	7.93488	2.10705e-15	1.61856e-13	RCN3	57333	RLP49	ENSG00000142552
241	3049.76787993646	0.756652	1.32161	-0.402298	0.050748	-7.92736	2.2385e-15	1.71241e-13	NXF1	10482	MEX67	ENSG00000162231
242	686.281329771434	0.686821	1.45598	-0.541994	0.0684659	-7.91626	2.44755e-15	1.86459e-13	SLC9A5	6553	NHE5	ENSG00000135740
243	85.7800793453273	0.376587	2.65543	-1.40894	0.178229	-7.90526	2.67372e-15	2.0285e-13	COL20A1	57642	COL20A1	ENSG00000101203
244	107.115899873497	0.417479	2.39533	-1.26022	0.159453	-7.90344	2.71299e-15	2.04986e-13	RRAD	6236	RAD	ENSG00000166592
245	474.215299462931	0.554542	1.80329	-0.85063	0.107705	-7.89777	2.83933e-15	2.13656e-13	PARD6G-AS1	100130522	PARD6G-AS1	ENSG00000267270
246	3088.68765232501	1.23428	1.23428	0.303666	0.0384521	7.89726	2.85107e-15	2.13668e-13	LGMN	5641	AEP	ENSG00000100600
247	63484.1074714745	1.22113	1.22113	0.288214	0.0365351	7.88869	3.05367e-15	2.27925e-13	CALR	811	CALR1	ENSG00000179218
248	1527.05846201618	0.761232	1.31366	-0.393593	0.0499234	-7.88392	3.17257e-15	2.35845e-13	ACTR3B	57180	ARP11	ENSG00000133627
249	21522.0041936568	1.23876	1.23876	0.308894	0.0391876	7.88245	3.21033e-15	2.37693e-13	EEF1A2	1917	DEE33	ENSG00000101210
250	15625.6634781231	1.22559	1.22559	0.293471	0.0372362	7.88134	3.23893e-15	2.38852e-13	H1-0	3005	H1.0	ENSG00000189060
251	881.324591340867	0.697931	1.43281	-0.518843	0.0658639	-7.8775	3.34001e-15	2.45324e-13	MRPS25	64432	COXPD50	ENSG00000131368
252	268.521772262168	0.585547	1.7078	-0.772142	0.0982197	-7.86138	3.79918e-15	2.77943e-13	AGAP4	119016	AGAP-4	ENSG00000188234
253	20387.3007363715	1.35979	1.35979	0.443387	0.0564719	7.85146	4.11211e-15	2.99648e-13	TPI1	7167	HEL-S-49	ENSG00000111669
254	349.220289064862	0.573314	1.74424	-0.802602	0.102316	-7.84436	4.35166e-15	3.15855e-13	DDX11-AS1	100506660	CONCR	ENSG00000245614
255	1276.33501075097	0.690476	1.44828	-0.534337	0.0683279	-7.82018	5.27465e-15	3.80464e-13	RNF207	388591	C1orf188	ENSG00000158286
256	2984.10227199926	0.789069	1.26732	-0.341776	0.0437055	-7.81998	5.28308e-15	3.80464e-13	FAM111A	63901	GCLEB	ENSG00000166801
257	2733.25553305199	0.750677	1.33213	-0.413737	0.0529191	-7.81829	5.35449e-15	3.84106e-13	UNKL	64718	C16orf28	ENSG00000059145
258	4264.96891012231	0.711786	1.40492	-0.490485	0.0627802	-7.81274	5.59592e-15	3.9987e-13	ARGLU1	55082	ARGLU1	ENSG00000134884
259	5615.9164233903	1.21907	1.21907	0.285784	0.0365816	7.81222	5.6189e-15	3.99961e-13	LTBR	4055	D12S370	ENSG00000111321
260	3663.22780018617	0.805394	1.24163	-0.312233	0.0400876	-7.78877	6.76671e-15	4.79812e-13	ATP6V0A1	535	ATP6N1	ENSG00000033627
261	4300.14354239362	0.778908	1.28385	-0.360476	0.0463419	-7.77861	7.33269e-15	5.17952e-13	KAT2A	2648	GCN5	ENSG00000108773
262	30163.6204933171	1.23622	1.23622	0.305935	0.0393588	7.77298	7.66622e-15	5.39445e-13	FTL	2512	FTL1	ENSG00000087086
263	464.048258349986	0.666561	1.50024	-0.585191	0.0755294	-7.74786	9.34535e-15	6.55098e-13	PPM1K	152926	BDP	ENSG00000163644
264	4081.90131017353	1.26418	1.26418	0.338201	0.0437018	7.73884	1.00326e-14	6.98464e-13	CCN2	1490	CTGF	ENSG00000118523
265	8128.0734444975	0.842944	1.18632	-0.246492	0.0318517	-7.73875	1.00398e-14	6.98464e-13	INTS3	65123	C1orf193	ENSG00000143624
266	958.044925808898	0.748096	1.33673	-0.418705	0.0541883	-7.72686	1.10229e-14	7.63981e-13	FASTKD1	79675	FASTKD1	ENSG00000138399
267	9520.35951627698	1.23612	1.23612	0.305816	0.0396284	7.7171	1.19007e-14	8.21726e-13	FKBP10	60681	BRKS	ENSG00000141756
268	2587.7955147869	1.32655	1.32655	0.407682	0.0528581	7.71275	1.23133e-14	8.47045e-13	LRPAP1	4043	A2MRAP	ENSG00000163956
269	3560.25609498517	1.29817	1.29817	0.376474	0.0488319	7.7096	1.26215e-14	8.65016e-13	TP53I11	9537	PIG11	ENSG00000175274
270	5365.86203117422	0.748782	1.3355	-0.417382	0.0541445	-7.70867	1.27134e-14	8.68088e-13	LUC7L3	51747	CRA	ENSG00000108848
271	1097.08028633435	0.724346	1.38056	-0.46525	0.0603785	-7.70555	1.30283e-14	8.86312e-13	ZNF529	57711	ZNF529	ENSG00000186020
272	375.482484987301	1.54649	1.54649	0.628996	0.0816567	7.70294	1.32975e-14	9.01295e-13	KCNQ2	3785	BFNC	ENSG00000075043
273	2459.3598498056	1.27536	1.27536	0.350906	0.045584	7.69801	1.38203e-14	9.33301e-13	PGM1	5236	CDG1T	ENSG00000079739
274	1946.56878996029	0.753537	1.32707	-0.40825	0.0530699	-7.69268	1.44082e-14	9.69453e-13	CYTH2	9266	ARNO	ENSG00000105443
275	438.246110542188	1.5538	1.5538	0.635797	0.0826831	7.68957	1.47635e-14	9.89747e-13	KLK4	9622	AI2A1	ENSG00000167749
276	1314.39676326267	1.34938	1.34938	0.432292	0.0562626	7.68346	1.54845e-14	1.03432e-12	HSD3B7	80270	CBAS1	ENSG00000099377
277	1097.48020501161	0.747122	1.33847	-0.420584	0.0547438	-7.68277	1.55687e-14	1.03619e-12	ENGASE	64772	ENGASE	ENSG00000167280
278	37950.1227093103	1.17228	1.17228	0.229316	0.0298513	7.68193	1.56705e-14	1.03922e-12	IQGAP1	8826	HUMORFA01	ENSG00000140575
279	917.189963115502	0.698222	1.43221	-0.518242	0.0674704	-7.68104	1.57805e-14	1.04276e-12	ZNF862	643641	ZNF862	ENSG00000106479
280	3799.75929426582	1.29593	1.29593	0.373987	0.0487043	7.67873	1.60679e-14	1.05796e-12	THBS1	7057	THBS	ENSG00000137801
281	9722.99693104766	1.19106	1.19106	0.25225	0.0328593	7.67666	1.63287e-14	1.0685e-12	ERGIC1	57222	AMC2	ENSG00000113719
282	1062.0395538313	1.47897	1.47897	0.564594	0.073548	7.67654	1.63439e-14	1.0685e-12	SLC29A4	222962	ENT4	ENSG00000164638
283	830.875765881759	0.707106	1.41422	-0.500002	0.0651954	-7.66928	1.72967e-14	1.12679e-12	TEPSIN	146705	C17orf56	ENSG00000167302
284	2034.13635655495	0.780444	1.28132	-0.357633	0.0466633	-7.66412	1.80062e-14	1.16888e-12	ZNF331	55422	RITA	ENSG00000130844
285	190.249576318521	0.540021	1.85178	-0.888912	0.116023	-7.66149	1.83792e-14	1.18891e-12	MISFA	100506540	Kastor	ENSG00000247595
286	2288.40622467765	0.774994	1.29033	-0.367743	0.0480068	-7.66022	1.85614e-14	1.19233e-12	CREM	1390	CREM-2	ENSG00000095794
287	3980.3848503058	0.819483	1.22028	-0.287213	0.0374936	-7.66032	1.8547e-14	1.19233e-12	IQGAP3	128239	IQGAP3	ENSG00000183856
288	3491.24339747753	0.770058	1.2986	-0.376962	0.0492867	-7.64833	2.03599e-14	1.30331e-12	SLC7A6	9057	LAT-2	ENSG00000103064
289	123.548629392489	0.457619	2.18522	-1.12778	0.147536	-7.64411	2.10394e-14	1.34215e-12	QRICH2	84074	SPGF35	ENSG00000129646
290	12788.4670669149	1.303	1.303	0.381834	0.0500536	7.62849	2.37515e-14	1.50994e-12	EFHD2	79180	SWS1	ENSG00000142634
291	423.80223753305	0.637489	1.56865	-0.649528	0.0852476	-7.61931	2.55037e-14	1.61576e-12	SCNN1D	6339	ENaCd	ENSG00000162572
292	2452.98802289956	1.23312	1.23312	0.302316	0.0396942	7.61614	2.61373e-14	1.65023e-12	NECAP2	55707	NECAP2	ENSG00000157191
293	8554.08922980927	1.23472	1.23472	0.304183	0.0399448	7.61508	2.63525e-14	1.65814e-12	UGCG	7357	GCS	ENSG00000148154
294	291.691661112613	0.54299	1.84166	-0.881004	0.115834	-7.60574	2.83276e-14	1.77635e-12	KCNMB3	27094	BKBETA3	ENSG00000171121
295	37646.2520064443	1.14357	1.14357	0.193539	0.025508	7.58736	3.26477e-14	2.04032e-12	APP	351	AAA	ENSG00000142192
296	186.364151890692	0.462494	2.16219	-1.11249	0.146768	-7.57996	3.45671e-14	2.15297e-12	ATXN7L3-AS1	101926967	ATXN7L3-AS1	ENSG00000260793
297	26357.7011071701	1.1925	1.1925	0.253991	0.033511	7.57933	3.47347e-14	2.15612e-12	PTPRF	5792	BNAH2	ENSG00000142949
298	385.078197128378	1.56181	1.56181	0.643223	0.0849167	7.57475	3.5981e-14	2.22599e-12	IFT70A	92104	CFAP259	ENSG00000197557
299	190.272516998603	0.4743	2.10837	-1.07613	0.142108	-7.5726	3.65826e-14	2.25564e-12	#N/A	#N/A	#N/A	ENSG00000275223
300	1777.1198115107	0.787276	1.2702	-0.345059	0.0455727	-7.57162	3.68605e-14	2.2652e-12	GEN1	348654	Gen	ENSG00000178295
301	3280.61750218757	0.788718	1.26788	-0.342419	0.0452333	-7.57007	3.73016e-14	2.27713e-12	ZFC3H1	196441	CCDC131	ENSG00000133858
302	969.909525153953	0.643193	1.55474	-0.636675	0.0841002	-7.57044	3.71969e-14	2.27713e-12	RPL32P3	132241	RPL32P3	ENSG00000290993
303	235.119556031829	0.561995	1.77937	-0.83137	0.109897	-7.56502	3.87811e-14	2.35963e-12	#N/A	#N/A	#N/A	ENSG00000261786
304	710.321360788829	0.630292	1.58657	-0.665908	0.0880414	-7.56358	3.92119e-14	2.378e-12	TRIM52	84851	RNF102	ENSG00000183718
305	860.734127227061	0.688716	1.45198	-0.538018	0.0711517	-7.56157	3.98239e-14	2.40719e-12	MSANTD2	79684	C11orf61	ENSG00000120458
306	2175.69030703934	1.26299	1.26299	0.336844	0.0445623	7.55894	4.06382e-14	2.44838e-12	YIPF2	78992	FinGER2	ENSG00000130733
307	1409.9349115567	0.692846	1.44332	-0.529393	0.0700574	-7.55655	4.13892e-14	2.48551e-12	MRNIP	51149	C5orf45	ENSG00000161010
308	494.105130899872	1.51144	1.51144	0.595923	0.0788872	7.55412	4.21717e-14	2.52428e-12	PDE5A	8654	CGB-PDE	ENSG00000138735
309	4970.19744054712	1.21335	1.21335	0.278995	0.0369439	7.55184	4.29137e-14	2.56038e-12	DGCR2	9993	DGS-C	ENSG00000070413
310	2329.0656808922	1.2778	1.2778	0.353658	0.0468339	7.55132	4.30885e-14	2.56252e-12	NSDHL	50814	H105E3	ENSG00000147383
311	1416.1615894767	0.67875	1.4733	-0.559047	0.0740658	-7.54798	4.42046e-14	2.62044e-12	LBHD1	79081	C11orf48	ENSG00000162194
312	49223.8769763069	1.17701	1.17701	0.235133	0.0311958	7.53732	4.79721e-14	2.83466e-12	ITGB1	3688	CD29	ENSG00000150093
313	272.414209943888	1.74296	1.74296	0.80154	0.106748	7.5087	5.97187e-14	3.51749e-12	LRRN2	10446	FIGLER7	ENSG00000170382
314	1522.24180301734	0.773425	1.29295	-0.370667	0.0495293	-7.48381	7.22003e-14	4.23913e-12	NUP42	11097	CG1	ENSG00000136243
315	330.046693608366	0.612521	1.6326	-0.707169	0.094654	-7.4711	7.95273e-14	4.65449e-12	MIR3936HG	553103	SLC22A5-AS1	ENSG00000233006
316	1384.84829533113	1.29694	1.29694	0.375107	0.0502141	7.47016	8.01002e-14	4.67319e-12	SPRY2	10253	IGAN3	ENSG00000136158
317	7351.18862368398	0.829297	1.20584	-0.270039	0.0361545	-7.46904	8.07836e-14	4.69819e-12	SRSF5	6430	HRS	ENSG00000100650
318	832.9002128183	0.705296	1.41784	-0.503699	0.0674568	-7.46698	8.20561e-14	4.75719e-12	STX1A	6804	HPC-1	ENSG00000106089
319	9399.06149373038	0.720826	1.3873	-0.472276	0.0632665	-7.46487	8.33813e-14	4.81886e-12	PLEKHG2	64857	ARHGEF42	ENSG00000090924
320	2860.6987103164	1.22247	1.22247	0.289798	0.0388665	7.45626	8.90162e-14	5.12844e-12	HIBADH	11112	NS5ATP1	ENSG00000106049
321	4357.03783008782	0.776422	1.28796	-0.365086	0.0489718	-7.45503	8.98461e-14	5.16014e-12	CAPN15	6650	OGIN	ENSG00000103326
322	593.746977736194	0.676352	1.47852	-0.564153	0.0758153	-7.44115	9.98162e-14	5.71494e-12	#N/A	#N/A	#N/A	ENSG00000223745
323	3096.24168456517	1.2961	1.2961	0.374179	0.0503378	7.43337	1.05869e-13	6.04272e-12	MSMO1	6307	DESP4	ENSG00000052802
324	817.820677408889	0.563337	1.77514	-0.82793	0.111484	-7.42646	1.11539e-13	6.3467e-12	#N/A	#N/A	#N/A	ENSG00000244879
325	2174.92275251712	0.741931	1.34783	-0.430643	0.0581893	-7.40073	1.35441e-13	7.68304e-12	SOCS2	8835	CIS2	ENSG00000120833
326	3517.06058022495	1.28107	1.28107	0.357352	0.0484147	7.38106	1.57032e-13	8.88049e-12	CAV1	857	BSCL3	ENSG00000105974
327	3675.04232994102	1.19753	1.19753	0.260066	0.0353023	7.36682	1.74745e-13	9.85201e-12	FKBP9	11328	FKBP60	ENSG00000122642
328	800.056744485629	0.713272	1.40199	-0.487477	0.0661812	-7.36579	1.76103e-13	9.89826e-12	SS18L2	51188	KIAA-iso	ENSG00000008324
329	979.154573625171	0.612017	1.63394	-0.708356	0.0962344	-7.36074	1.82894e-13	1.02487e-11	H4C8	8365	H4-16	ENSG00000158406
330	1772.75587679978	0.793673	1.25996	-0.333383	0.0453136	-7.35723	1.87762e-13	1.04896e-11	STX3	6809	DIAR12	ENSG00000166900
331	274.177148432439	0.531183	1.88259	-0.91272	0.124163	-7.35096	1.96793e-13	1.0961e-11	MYPN	84665	CMD1DD	ENSG00000138347
332	81.9469696771702	2.69546	2.69546	1.43053	0.195174	7.32953	2.30966e-13	1.28256e-11	PPP1R3G	648791	PPP1R3G	ENSG00000219607
333	6851.36572236724	1.19258	1.19258	0.254086	0.0346974	7.3229	2.42672e-13	1.34352e-11	RAB3B	5865	RAB3B	ENSG00000169213
334	2464.25158318034	1.27929	1.27929	0.35534	0.0485608	7.31744	2.52754e-13	1.3878e-11	C4orf3	401152	ALN	ENSG00000164096
335	245.086425692131	1.70554	1.70554	0.770225	0.10526	7.31734	2.5293e-13	1.3878e-11	L1CAM	3897	CAML1	ENSG00000198910
336	679.884751258886	0.611941	1.63414	-0.708535	0.0968255	-7.31765	2.52346e-13	1.3878e-11	#N/A	#N/A	#N/A	ENSG00000233175
337	611.368097939339	0.64416	1.55241	-0.634509	0.0867334	-7.31562	2.56191e-13	1.40152e-11	APBB3	10307	FE65L2	ENSG00000113108
338	12933.834495958	1.16431	1.16431	0.219475	0.0300049	7.31463	2.58087e-13	1.40772e-11	VAT1	10493	VATI	ENSG00000108828
339	2467.63472716907	1.2465	1.2465	0.317884	0.043528	7.30298	2.81471e-13	1.53074e-11	TMEM179B	374395	TMEM179B	ENSG00000185475
340	3719.72785583888	1.23052	1.23052	0.29927	0.0409895	7.30114	2.85342e-13	1.54723e-11	RUSF1	64755	C16orf58	ENSG00000140688
341	1605.04250311476	1.26148	1.26148	0.335118	0.0459211	7.29769	2.92756e-13	1.58277e-11	PDIA5	10954	PDIR	ENSG00000065485
342	1920.50992510294	1.2763	1.2763	0.351967	0.048252	7.29436	3.00084e-13	1.61765e-11	GAMT	2593	CCDS2	ENSG00000130005
343	2949.16264280844	1.25096	1.25096	0.323038	0.0443106	7.29032	3.09226e-13	1.66207e-11	FBLN1	2192	FBLN	ENSG00000077942
344	15023.1070332754	1.1724	1.1724	0.229462	0.0314796	7.28924	3.11699e-13	1.67049e-11	TMEM123	114908	KCT3	ENSG00000152558
345	3634.08937160585	1.37992	1.37992	0.464587	0.0637592	7.28658	3.17916e-13	1.69887e-11	HCFC1R1	54985	HPIP	ENSG00000103145
346	25809.9084799385	1.18128	1.18128	0.240355	0.0330498	7.27252	3.52854e-13	1.88012e-11	HYOU1	10525	GRP-170	ENSG00000149428
347	203.507269519926	0.509372	1.9632	-0.973208	0.133869	-7.26986	3.59872e-13	1.91199e-11	#N/A	#N/A	#N/A	ENSG00000256673
348	3025.70637792276	0.825551	1.21131	-0.276571	0.0380553	-7.2676	3.65919e-13	1.93853e-11	WSB1	26118	SWIP1	ENSG00000109046
349	8095.62232801114	1.19579	1.19579	0.257968	0.0355243	7.26173	3.82162e-13	2.01878e-11	GNAI2	2771	GIP	ENSG00000114353
350	2117.83233925374	0.710806	1.40685	-0.492473	0.0678765	-7.25542	4.0041e-13	2.10312e-11	WDR90	197335	C16orf15	ENSG00000161996
351	966.563429184253	1.35624	1.35624	0.43961	0.0605879	7.25574	3.99485e-13	2.10312e-11	OGFOD3	79701	C17orf101	ENSG00000181396
352	1113.46492808145	1.41169	1.41169	0.497419	0.0685977	7.25125	4.12957e-13	2.16286e-11	ENO2	2026	HEL-S-279	ENSG00000111674
353	2196.86691592211	0.775248	1.28991	-0.367271	0.0506912	-7.24526	4.31608e-13	2.25415e-11	SPPL2B	56928	IMP-4	ENSG00000005206
354	354.766758662631	0.515497	1.93987	-0.955963	0.132005	-7.24188	4.425e-13	2.3045e-11	LINC01410	103352539	LINC01410	ENSG00000238113
355	229.511027080444	0.551066	1.81467	-0.859703	0.118752	-7.23948	4.50423e-13	2.33915e-11	#N/A	#N/A	#N/A	ENSG00000236255
356	18577.668435791	1.19472	1.19472	0.256675	0.0354697	7.23647	4.60528e-13	2.38491e-11	SLC25A6	293	AAC3	ENSG00000169100
357	586.969731295406	0.608164	1.64429	-0.717468	0.0991688	-7.23482	4.66156e-13	2.4073e-11	HOXA11-AS	221883	HOXA-AS5	ENSG00000240990
358	718.036794819198	0.702077	1.42435	-0.5103	0.0705894	-7.22913	4.86105e-13	2.5033e-11	#N/A	#N/A	#N/A	ENSG00000232931
359	271.880860352521	0.527263	1.89659	-0.923405	0.127893	-7.22016	5.19254e-13	2.66656e-11	#N/A	#N/A	#N/A	ENSG00000228393
360	1649.68238000612	1.26843	1.26843	0.343043	0.0475958	7.20742	5.70228e-13	2.9202e-11	CAPG	822	AFCP	ENSG00000042493
361	1072.62911831801	0.756938	1.32111	-0.401753	0.055756	-7.20556	5.78068e-13	2.95215e-11	CARD8	22900	CARDINAL	ENSG00000105483
362	1780.95786392024	1.24477	1.24477	0.315884	0.0438472	7.20421	5.83829e-13	2.97334e-11	RRAS	6237	R-Ras	ENSG00000126458
363	46.5786516165938	0.280686	3.56269	-1.83297	0.254687	-7.19695	6.15732e-13	3.12067e-11	WFIKKN1	117166	C16orf12	ENSG00000127578
364	1086.78528128859	0.691586	1.44595	-0.532019	0.0739238	-7.19686	6.16144e-13	3.12067e-11	RILPL1	353116	GOSPEL	ENSG00000188026
365	2043.06820906396	0.796295	1.25582	-0.328625	0.0456676	-7.19603	6.19921e-13	3.13119e-11	C21orf58	54058	C21orf58	ENSG00000160298
366	210.151505609955	0.550916	1.81516	-0.860095	0.119754	-7.1822	6.86007e-13	3.45553e-11	#N/A	#N/A	#N/A	ENSG00000287110
367	4997.42612946818	1.19723	1.19723	0.259702	0.0361612	7.18178	6.88073e-13	3.45649e-11	LRRC8A	56262	AGM5	ENSG00000136802
368	8263.31659767922	1.27238	1.27238	0.347526	0.0484129	7.17837	7.05452e-13	3.53416e-11	MANF	7873	ARMET	ENSG00000145050
369	2853.62500728439	1.22456	1.22456	0.292263	0.0407687	7.1688	7.56574e-13	3.78e-11	G6PC3	92579	SCN4	ENSG00000141349
370	87.2570316626526	0.43671	2.28985	-1.19525	0.167009	-7.1568	8.25812e-13	4.09381e-11	COL7A1	1294	EBD1	ENSG00000114270
371	7702.27250029197	1.19911	1.19911	0.261959	0.0366031	7.15676	8.26045e-13	4.09381e-11	CTSB	1508	APPS	ENSG00000164733
372	277.461259015212	0.561161	1.78202	-0.833514	0.116454	-7.15746	8.21859e-13	4.09381e-11	FRMD6-AS1	145438	C14orf82	ENSG00000258537
373	114.934265482951	0.473292	2.11286	-1.0792	0.150839	-7.15463	8.38998e-13	4.14686e-11	HNRNPUL2-BSCL2	100534595	HNRNPUL2-BSCL2	ENSG00000234857
374	117.117943923842	0.428593	2.33321	-1.22232	0.171532	-7.12591	1.03395e-12	5.09674e-11	PLAC8L1	153770	PLAC8L1	ENSG00000173261
375	572.285863587183	1.39264	1.39264	0.477827	0.0670906	7.12212	1.06283e-12	5.22515e-11	CSRP2	1466	CRP2	ENSG00000175183
376	1460.72071087639	1.34118	1.34118	0.423508	0.0594692	7.12147	1.06783e-12	5.23579e-11	APLP1	333	APLP	ENSG00000105290
377	414.977434637393	1.48321	1.48321	0.568725	0.0799814	7.11072	1.15435e-12	5.64498e-11	PLK2	10769	SNK	ENSG00000145632
378	2067.47197384474	0.777664	1.2859	-0.362781	0.0511689	-7.08986	1.34244e-12	6.5474e-11	EME2	197342	SLX2B	ENSG00000197774
379	684.33506401317	0.705476	1.41748	-0.503331	0.0710448	-7.0847	1.39348e-12	6.7784e-11	#N/A	#N/A	#N/A	ENSG00000232098
380	3986.558770587	1.24376	1.24376	0.31471	0.044475	7.07612	1.48245e-12	7.1922e-11	KDELR3	11015	ERD23	ENSG00000100196
381	3243.19369142843	1.2723	1.2723	0.347441	0.0491034	7.07569	1.48708e-12	7.19573e-11	CEBPD	1052	C/EBP-delta	ENSG00000221869
382	256.218686019771	0.618826	1.61596	-0.692395	0.0979409	-7.06952	1.55472e-12	7.50334e-11	TTC32	130502	TTC32	ENSG00000183891
383	889.495343557634	0.747172	1.33838	-0.420487	0.0595232	-7.06427	1.61465e-12	7.77224e-11	LINC-PINT	378805	LincRNA-Pint	ENSG00000231721
384	232.95270860749	0.564284	1.77216	-0.825507	0.116913	-7.06085	1.65487e-12	7.9451e-11	#N/A	#N/A	#N/A	ENSG00000248015
385	4207.25145120736	1.21348	1.21348	0.279146	0.0396513	7.04002	1.92208e-12	9.204e-11	UBASH3B	84959	STS-1	ENSG00000154127
386	6510.60912691015	1.21516	1.21516	0.281144	0.0399413	7.03895	1.93699e-12	9.2275e-11	SQLE	6713	SQLE	ENSG00000104549
387	703.431113000187	1.46465	1.46465	0.550551	0.0782146	7.03898	1.93646e-12	9.2275e-11	RIMKLA	284716	FAM80A	ENSG00000177181
388	1756.06823047694	1.35234	1.35234	0.435456	0.0619318	7.03122	2.0474e-12	9.7283e-11	TNFRSF10D	8793	CD264	ENSG00000173530
389	9890.53978205466	1.15821	1.15821	0.211896	0.030144	7.02946	2.07335e-12	9.82628e-11	IPO9	55705	Imp9	ENSG00000198700
390	905.949159934837	0.751498	1.33068	-0.412159	0.0586746	-7.02448	2.14859e-12	1.01568e-10	NBPF12	149013	COAS1	ENSG00000268043
391	250.022803717444	0.610801	1.6372	-0.711226	0.101313	-7.02012	2.2168e-12	1.04524e-10	ALOX12P2	245	ALOX12E	ENSG00000291084
392	235.793770667292	0.551796	1.81226	-0.857792	0.122368	-7.00995	2.38409e-12	1.12125e-10	FAM229A	100128071	FAM229A	ENSG00000225828
393	2549.31596826202	0.779876	1.28226	-0.358684	0.0511844	-7.00768	2.42305e-12	1.13668e-10	BRCA2	675	BRCC2	ENSG00000139618
394	486.859776422455	1.58477	1.58477	0.664278	0.094825	7.0053	2.46456e-12	1.15322e-10	TMEM141	85014	TMEM141	ENSG00000244187
395	164.558005835255	0.529898	1.88716	-0.916213	0.13088	-7.00039	2.55243e-12	1.19131e-10	TEKTIP1	100128569	C19orf71	ENSG00000183397
396	5626.6582563898	1.23064	1.23064	0.299406	0.0427781	6.99905	2.57709e-12	1.19978e-10	ALDH18A1	5832	ADCL3	ENSG00000059573
397	1647.73379109235	1.25892	1.25892	0.332191	0.0475398	6.98764	2.79552e-12	1.29819e-10	CLK3	1198	PHCLK3	ENSG00000179335
398	14816.9932869754	1.23145	1.23145	0.300353	0.0429884	6.98683	2.81172e-12	1.30243e-10	CITED2	10370	ASD8	ENSG00000164442
399	40.7035479983524	0.267188	3.74269	-1.90407	0.27265	-6.98359	2.87725e-12	1.32945e-10	SMIM47	105372440	SMIM47	ENSG00000261341
400	163.323197315243	0.50577	1.97718	-0.983446	0.140939	-6.97781	2.9981e-12	1.38182e-10	GOT1-DT	101927300	GOT1-DT	ENSG00000224934
401	536.944398233023	0.65283	1.53179	-0.61522	0.0882203	-6.97368	3.08747e-12	1.41947e-10	#N/A	#N/A	#N/A	ENSG00000291068
402	17383.0161217329	1.23591	1.23591	0.30557	0.0438202	6.97326	3.09672e-12	1.42018e-10	HSPB1	3315	CMT2F	ENSG00000106211
403	6442.21597097445	1.28365	1.28365	0.360256	0.0516794	6.97098	3.14735e-12	1.43935e-10	TAPBP	6892	NGS17	ENSG00000231925
404	1325.96262962475	0.774947	1.29041	-0.36783	0.0527682	-6.97068	3.15415e-12	1.43935e-10	ZBED5	58486	Buster1	ENSG00000236287
405	5371.20562508793	1.2197	1.2197	0.286531	0.0411104	6.9698	3.17381e-12	1.44475e-10	TMEM97	27346	MAC30	ENSG00000109084
406	237.1518237351	0.555462	1.8003	-0.84824	0.121719	-6.96885	3.19545e-12	1.45102e-10	#N/A	#N/A	#N/A	ENSG00000293324
407	2571.10324067468	0.818939	1.22109	-0.288173	0.0413579	-6.96779	3.21968e-12	1.45843e-10	TAF1C	9013	MGC:39976	ENSG00000103168
408	1404.34680369835	1.31245	1.31245	0.392259	0.0563333	6.96317	3.32696e-12	1.50333e-10	SDC2	6383	CD362	ENSG00000169439
409	1392.76099185605	1.29955	1.29955	0.378014	0.0542947	6.96226	3.34865e-12	1.50943e-10	PYM1	84305	PYM	ENSG00000170473
410	1230.19396898789	1.28586	1.28586	0.362728	0.052144	6.95628	3.49367e-12	1.57096e-10	SIAE	54414	AIS6	ENSG00000110013
411	8923.77998433959	1.19605	1.19605	0.258283	0.0371437	6.95362	3.56031e-12	1.59703e-10	BPNT2	54928	GPAPP	ENSG00000104331
412	4461.00107859665	1.19613	1.19613	0.258369	0.0371775	6.9496	3.66316e-12	1.63918e-10	MBNL2	10150	MBLL	ENSG00000139793
413	1059.13365346811	1.41766	1.41766	0.503514	0.0724745	6.94747	3.71893e-12	1.65609e-10	CYBA	1535	CGD4	ENSG00000051523
414	3892.87077069345	0.825087	1.21199	-0.277382	0.0399252	-6.94755	3.71687e-12	1.65609e-10	ATM	472	AT1	ENSG00000149311
415	1232.06604323211	1.32317	1.32317	0.404002	0.0582116	6.94024	3.91444e-12	1.73896e-10	HSPA2	3306	HSP70-2	ENSG00000126803
416	118.906494078288	0.493143	2.02781	-1.01992	0.147017	-6.93744	3.99274e-12	1.76947e-10	#N/A	#N/A	#N/A	ENSG00000227598
417	3590.08064859407	1.21224	1.21224	0.277672	0.0400359	6.93558	4.04558e-12	1.78859e-10	DDX41	51428	ABS	ENSG00000183258
418	638.836078505873	0.65892	1.51763	-0.601824	0.0868624	-6.92848	4.25385e-12	1.87617e-10	ZNF224	7767	BMZF-2	ENSG00000267680
419	1824.84197012269	0.779751	1.28246	-0.358915	0.0518061	-6.92805	4.26688e-12	1.87743e-10	ST7	7982	ETS7q	ENSG00000004866
420	88.5270513672022	0.397468	2.51593	-1.33109	0.192388	-6.91879	4.55515e-12	1.9995e-10	TSSK3	81629	SPOGA3	ENSG00000162526
421	3402.31937880902	1.28208	1.28208	0.358486	0.0518289	6.91673	4.62203e-12	2.02403e-10	CHMP2A	27243	BC-2	ENSG00000130724
422	72.6829098359257	0.36778	2.71901	-1.44308	0.208816	-6.91079	4.81976e-12	2.10562e-10	C19orf18	147685	C19orf18	ENSG00000177025
423	191.605844858238	0.518521	1.92856	-0.947525	0.137212	-6.90554	5.00114e-12	2.17969e-10	PSMD6-AS2	100507062	PSMD6-AS2	ENSG00000239653
424	1818.05800440252	0.791428	1.26354	-0.337471	0.0488918	-6.9024	5.11297e-12	2.22318e-10	RNASEH2C	84153	AGS3	ENSG00000172922
425	120.835071154663	1.91936	1.91936	0.940628	0.136416	6.89531	5.37487e-12	2.33156e-10	TXNIP	10628	ARRDC6	ENSG00000265972
426	1199.54430591271	1.26588	1.26588	0.340135	0.0494586	6.87717	6.10542e-12	2.64224e-10	DNAJC30	84277	LHONAR	ENSG00000176410
427	5139.39548920368	1.22643	1.22643	0.294461	0.0428903	6.86544	6.62862e-12	2.86195e-10	MAGED2	10916	11B6	ENSG00000102316
428	2543.8674787276	0.803936	1.24388	-0.314847	0.0458714	-6.86368	6.71097e-12	2.89073e-10	ZNF107	51427	Y8	ENSG00000196247
429	1578.902128992	1.24751	1.24751	0.319053	0.0465831	6.84913	7.43018e-12	3.19307e-10	COL4A2	1284	BSVD2	ENSG00000134871
430	1892.80628542952	0.809744	1.23496	-0.304463	0.0445233	-6.83829	8.01455e-12	3.43619e-10	ZBTB40	9923	ZNF923	ENSG00000184677
431	1246.83434943803	0.672695	1.48656	-0.571976	0.0837044	-6.83329	8.29893e-12	3.54986e-10	PCGF3-AS1	100129917	PCGF3-AS1	ENSG00000249592
432	454.271721349063	0.653185	1.53096	-0.614437	0.0899429	-6.83141	8.40845e-12	3.58839e-10	C12orf76	400073	C12orf76	ENSG00000174456
433	12425.7125278227	1.28096	1.28096	0.357228	0.0523337	6.82597	8.73332e-12	3.71842e-10	GPI	2821	AMF	ENSG00000105220
434	2362.85032958943	1.23816	1.23816	0.308194	0.0451944	6.81931	9.148e-12	3.886e-10	QPCTL	54814	gQC	ENSG00000011478
435	970.912240905667	0.731271	1.36748	-0.451522	0.0662275	-6.81774	9.24866e-12	3.91973e-10	MZF1	7593	MZF-1	ENSG00000099326
436	644.338935405076	1.40015	1.40015	0.485585	0.0712542	6.81483	9.43748e-12	3.99058e-10	INSIG2	51141	INSIG-2	ENSG00000125629
437	10819.4410339197	1.18764	1.18764	0.248094	0.0364287	6.8104	9.73251e-12	4.10592e-10	DAG1	1605	156DAG	ENSG00000173402
438	897.670449369637	1.38745	1.38745	0.472437	0.0693875	6.80869	9.84946e-12	4.14577e-10	BDNF	627	ANON2	ENSG00000176697
439	7533.85240571883	1.26598	1.26598	0.340258	0.0500497	6.7984	1.05786e-11	4.44251e-10	TMED9	54732	GMP25	ENSG00000184840
440	1274.54732397442	0.778171	1.28507	-0.361842	0.0532719	-6.79236	1.10312e-11	4.62209e-10	PRPF39	55015	PRPF39	ENSG00000185246
441	652.914905346114	1.46685	1.46685	0.552722	0.0814493	6.78609	1.15214e-11	4.81651e-10	PADI2	11240	PAD-H19	ENSG00000117115
442	2561.05941554584	0.811808	1.23182	-0.30079	0.0443398	-6.78375	1.17098e-11	4.88419e-10	FANCA	2175	FA	ENSG00000187741
443	740.284983682196	1.35684	1.35684	0.440246	0.0649171	6.78166	1.188e-11	4.94402e-10	ETHE1	23474	HSCO	ENSG00000105755
444	3604.70169120462	0.845717	1.18243	-0.241753	0.0356652	-6.7784	1.21517e-11	5.04571e-10	PWWP3A	84939	EXPAND1	ENSG00000160953
445	5312.53765005929	0.854489	1.17029	-0.226867	0.033471	-6.77801	1.2184e-11	5.04774e-10	ARIH2	10425	ARI2	ENSG00000177479
446	628.718933789149	1.42043	1.42043	0.506326	0.0747305	6.77537	1.24093e-11	5.12953e-10	SLC1A1	6505	DCBXA	ENSG00000106688
447	1462.96266794541	0.75529	1.32399	-0.404897	0.0598632	-6.76371	1.345e-11	5.5473e-10	MRE11	4361	ATLD	ENSG00000020922
448	602.378888818774	0.693702	1.44154	-0.527613	0.0780675	-6.75842	1.39505e-11	5.74087e-10	#N/A	#N/A	#N/A	ENSG00000234160
449	27224.3150804819	1.43971	1.43971	0.525781	0.0778061	6.75759	1.4031e-11	5.76114e-10	KRT8	3856	CARD2	ENSG00000170421
450	142.844628203481	1.91314	1.91314	0.935946	0.138615	6.75215	1.45674e-11	5.96811e-10	KLK1	3816	KLKR	ENSG00000167748
451	169.110258890092	0.501063	1.99576	-0.996936	0.147673	-6.75098	1.46851e-11	6.00297e-10	#N/A	#N/A	#N/A	ENSG00000225218
452	249.430770116548	0.485156	2.06119	-1.04348	0.154594	-6.74981	1.48035e-11	6.038e-10	TMEM9B-AS1	493900	C11orf18	ENSG00000254860
453	4644.58617539465	1.20376	1.20376	0.267552	0.0396944	6.74029	1.58068e-11	6.433e-10	ACBD3	64746	GCP60	ENSG00000182827
454	7957.65148065007	0.849581	1.17705	-0.235177	0.0349048	-6.73766	1.60954e-11	6.536e-10	TRRAP	8295	DEDDFA	ENSG00000196367
455	6301.72490954447	1.17424	1.17424	0.231733	0.0344233	6.73186	1.67511e-11	6.78731e-10	CDCP1	64866	CD318	ENSG00000163814
456	2503.62095814275	0.799713	1.25045	-0.322446	0.0479655	-6.72247	1.78673e-11	7.22371e-10	TJAP1	93643	PILT	ENSG00000137221
457	478.160972500456	0.652694	1.53211	-0.615522	0.0915744	-6.72155	1.79804e-11	7.25353e-10	PSCA	8000	PRO232	ENSG00000167653
458	208.359866686801	0.601748	1.66182	-0.732768	0.109155	-6.71308	1.90561e-11	7.67071e-10	PLEKHM1P1	440456	PLEKHM1P	ENSG00000291117
459	838.160360012341	1.45593	1.45593	0.541937	0.0807445	6.71175	1.923e-11	7.72383e-10	ANKRD2	26287	ARPP	ENSG00000165887
460	105.301290580134	0.33781	2.96024	-1.56572	0.233351	-6.7097	1.95025e-11	7.81625e-10	LOC285638	285638	LOC285638	ENSG00000249476
461	4601.38609870639	0.819389	1.22042	-0.28738	0.0428463	-6.70724	1.98345e-11	7.9321e-10	SUGP2	10147	SFRS14	ENSG00000064607
462	2786.80025178008	1.2626	1.2626	0.336394	0.0501663	6.70558	2.00614e-11	8.00547e-10	FGFRL1	53834	FGFR-5	ENSG00000127418
463	232.30760934185	0.589924	1.69513	-0.7614	0.113609	-6.70196	2.05641e-11	8.18832e-10	ASIC3	9311	ACCN3	ENSG00000213199
464	55.7697470033861	0.329525	3.03467	-1.60154	0.239187	-6.69576	2.14556e-11	8.52488e-10	C19orf38	255809	HIDE1	ENSG00000214212
465	639.559926410499	1.41402	1.41402	0.499798	0.0746489	6.69531	2.15219e-11	8.53285e-10	SRPX	8406	DRS	ENSG00000101955
466	1133.06283023253	0.669047	1.49466	-0.57982	0.0866724	-6.68979	2.23498e-11	8.84208e-10	TMEM161B-DT	100505894	TMEM161B-AS1	ENSG00000247828
467	14810.008160599	0.855838	1.16845	-0.224591	0.0336004	-6.68417	2.32239e-11	9.16821e-10	GLS	2744	AAD20	ENSG00000115419
468	1375.10202750497	1.25322	1.25322	0.325639	0.0487278	6.68282	2.34391e-11	9.23341e-10	B3GALT6	126792	ALGAZ	ENSG00000176022
469	5564.04649306166	0.793842	1.2597	-0.333077	0.0499232	-6.67179	2.52707e-11	9.93369e-10	SHTN1	57698	KIAA1598	ENSG00000187164
470	1578.10235859352	0.805771	1.24105	-0.311559	0.0468	-6.65724	2.79012e-11	1.09444e-09	DHX34	9704	DDX34	ENSG00000134815
471	1602.1417807224	1.31942	1.31942	0.399903	0.0600816	6.656	2.81374e-11	1.10136e-09	SUCLG2	8801	G-SCS	ENSG00000172340
472	2620.37353473896	1.22692	1.22692	0.29504	0.0443317	6.65528	2.82765e-11	1.10446e-09	RCN1	5954	HEL-S-84	ENSG00000049449
473	1752.36117934697	0.708134	1.41216	-0.497905	0.0748585	-6.65128	2.90558e-11	1.1325e-09	ZCCHC2	54877	C18orf49	ENSG00000141664
474	617.801880962991	0.6479	1.54345	-0.626157	0.0944108	-6.63226	3.30576e-11	1.28576e-09	#N/A	#N/A	#N/A	ENSG00000268364
475	5114.70285130725	1.21382	1.21382	0.27956	0.0421607	6.63081	3.33846e-11	1.29574e-09	ERBB2	2064	CD340	ENSG00000141736
476	2034.58975147816	0.814834	1.22724	-0.295422	0.0445939	-6.62472	3.47908e-11	1.34749e-09	RPAIN	84268	HRIP	ENSG00000129197
477	898.384560077298	0.77635	1.28808	-0.365221	0.0551653	-6.62048	3.58028e-11	1.38377e-09	ZNF75A	7627	ZNF75A	ENSG00000162086
478	32.6401423406463	0.242594	4.12211	-2.04338	0.309025	-6.61235	3.7827e-11	1.45895e-09	#N/A	#N/A	#N/A	ENSG00000225857
479	608.239105613065	1.46831	1.46831	0.554158	0.0838176	6.61147	3.80521e-11	1.46457e-09	CACNA2D2	9254	CACNA2D	ENSG00000007402
480	3219.64098948056	1.26451	1.26451	0.338573	0.051277	6.60283	4.03396e-11	1.54938e-09	PTK7	5754	CCK-4	ENSG00000112655
481	88.8326324153497	0.415761	2.40523	-1.26617	0.191823	-6.60072	4.09161e-11	1.56825e-09	PILRA	29992	FDF03	ENSG00000085514
482	237.633374134611	0.60283	1.65884	-0.730176	0.110631	-6.60009	4.10904e-11	1.57167e-09	ZNF56P	7608	ZNF56	ENSG00000291177
483	225.139130610599	0.563001	1.77619	-0.82879	0.125589	-6.59923	4.13306e-11	1.57758e-09	#N/A	#N/A	#N/A	ENSG00000290762
484	783.564085493319	0.74899	1.33513	-0.416982	0.0632404	-6.5936	4.29275e-11	1.63178e-09	SFI1	9814	PISD	ENSG00000198089
485	380.98771552154	0.645438	1.54933	-0.631649	0.0957947	-6.59377	4.28782e-11	1.63178e-09	#N/A	#N/A	#N/A	ENSG00000293434
486	465.412170825771	0.659053	1.51733	-0.601533	0.0912399	-6.59287	4.31392e-11	1.63645e-09	SNHG10	283596	C14orf62	ENSG00000247092
487	7007.24624933954	1.14988	1.14988	0.201481	0.0306081	6.5826	4.62291e-11	1.75006e-09	EXOC4	60412	SEC8	ENSG00000131558
488	5748.39245018647	0.765239	1.30678	-0.386017	0.0586649	-6.58003	4.70365e-11	1.77698e-09	#N/A	#N/A	#N/A	ENSG00000275216
489	3578.97929699782	1.25423	1.25423	0.326806	0.0497189	6.57308	4.92848e-11	1.85811e-09	H6PD	9563	CORTRD1	ENSG00000049239
490	260.130809124821	0.631176	1.58434	-0.663886	0.101043	-6.57034	5.01993e-11	1.88872e-09	KIAA0319	9856	AAVR	ENSG00000137261
491	2614.75261145442	1.23575	1.23575	0.305387	0.0465198	6.56466	5.21515e-11	1.95818e-09	LRP12	29967	ALS28	ENSG00000147650
492	1694.99484138899	1.2669	1.2669	0.341299	0.0522236	6.53534	6.3466e-11	2.37817e-09	PHLDB2	90102	LL5b	ENSG00000144824
493	2891.0734899563	1.24883	1.24883	0.320578	0.0490882	6.53065	6.54842e-11	2.44882e-09	CGREF1	10669	CGR11	ENSG00000138028
494	2398.62303934577	0.753045	1.32794	-0.409191	0.0626731	-6.52898	6.6218e-11	2.47125e-09	#N/A	#N/A	#N/A	ENSG00000242588
495	3316.22691717359	0.800069	1.24989	-0.321803	0.0493391	-6.52227	6.92495e-11	2.57916e-09	PRPF38B	55119	NET1	ENSG00000134186
496	2660.15934175697	1.22486	1.22486	0.292616	0.0448742	6.5208	6.99334e-11	2.59938e-09	CD276	80381	4Ig-B7-H3	ENSG00000103855
497	129.917774560064	0.510472	1.95897	-0.970095	0.149083	-6.50707	7.66297e-11	2.84254e-09	LRRC69	100130742	LRRC69	ENSG00000214954
498	3971.23175977208	1.34123	1.34123	0.423557	0.065095	6.50674	7.67969e-11	2.84303e-09	MYADM	91663	SB135	ENSG00000179820
499	585.250933423295	1.35008	1.35008	0.433044	0.0665631	6.50576	7.72992e-11	2.85589e-09	IFT46	56912	C11orf2	ENSG00000118096
500	451.559103299998	0.65241	1.53278	-0.616148	0.0947209	-6.50488	7.77559e-11	2.86702e-09	SLC25A16	8034	D10S105E	ENSG00000122912
501	322.226921794652	1.51422	1.51422	0.598571	0.0921067	6.49867	8.10342e-11	2.98193e-09	PPP4R4	57718	CFAP14	ENSG00000119698
502	132.38441490345	0.473281	2.11291	-1.07923	0.166155	-6.49533	8.2849e-11	3.04264e-09	#N/A	#N/A	#N/A	ENSG00000234617
503	9176.62257454477	1.18394	1.18394	0.243599	0.037517	6.49303	8.41278e-11	3.08346e-09	TMED10	10972	P24(DELTA)	ENSG00000170348
504	1646.1990987684	1.29494	1.29494	0.372887	0.0575993	6.47381	9.55626e-11	3.49562e-09	UNC93B1	81622	IIAE1	ENSG00000110057
505	2183.97621454853	0.809743	1.23496	-0.304464	0.0470425	-6.4721	9.66474e-11	3.5283e-09	DDX11	1663	CHL1	ENSG00000013573
506	8640.64925363058	1.17487	1.17487	0.232506	0.0359321	6.47072	9.75393e-11	3.55382e-09	TP53	7157	BCC7	ENSG00000141510
507	1278.04298358742	0.786778	1.27101	-0.345971	0.0534719	-6.47015	9.7908e-11	3.56022e-09	POLQ	10721	PRO0327	ENSG00000051341
508	594.484296716906	0.655568	1.52539	-0.609182	0.0942462	-6.46373	1.02151e-10	3.7072e-09	LINC01265	101926904	LINC01265	ENSG00000249740
509	3881.52645966794	0.791724	1.26307	-0.33693	0.0521522	-6.46051	1.04352e-10	3.77965e-09	N4BP2L2	10443	92M18.3	ENSG00000244754
510	14502.0456486083	1.18965	1.18965	0.250532	0.0388043	6.4563	1.07297e-10	3.87868e-09	RPN1	6184	OST1	ENSG00000163902
511	7824.3780724235	1.18767	1.18767	0.248137	0.0384687	6.45038	1.11572e-10	4.02533e-09	COTL1	23406	CLP	ENSG00000103187
512	305.529434047735	1.66349	1.66349	0.73421	0.113915	6.44523	1.15422e-10	4.15609e-09	ZNF467	168544	EZI	ENSG00000181444
513	12556.2186865672	0.877729	1.1393	-0.188153	0.0292144	-6.44044	1.19129e-10	4.2812e-09	MCL1	4170	BCL2L3	ENSG00000143384
514	908.978201149031	0.772854	1.29391	-0.371732	0.0577423	-6.43778	1.21235e-10	4.34841e-09	CCDC66	285331	CCDC66	ENSG00000180376
515	151.553900080229	0.550898	1.81522	-0.860143	0.13372	-6.43241	1.25597e-10	4.49611e-09	#N/A	#N/A	#N/A	ENSG00000242622
516	712.462534786468	0.747813	1.33723	-0.419251	0.0652565	-6.42466	1.32162e-10	4.72197e-09	CROT	54677	COT	ENSG00000005469
517	602.031122133331	1.39619	1.39619	0.481493	0.075053	6.41537	1.40478e-10	5.00938e-09	HLA-F	3134	CDA12	ENSG00000204642
518	1621.59576090731	1.25774	1.25774	0.330836	0.0515764	6.41449	1.413e-10	5.01804e-09	GMPR	2766	GMPR 1	ENSG00000137198
519	3525.11841344307	0.821223	1.2177	-0.284154	0.044298	-6.4146	1.41196e-10	5.01804e-09	ETS2	2114	ETS2IT1	ENSG00000157557
520	1057.05001911462	0.783835	1.27578	-0.351378	0.054781	-6.41423	1.41537e-10	5.01804e-09	C10orf95-AS1	100505761	RPARP-AS1	ENSG00000269609
521	645.327400796294	0.727572	1.37443	-0.458837	0.0715852	-6.40967	1.4584e-10	5.16065e-09	COX10-DT	100874058	COX10-AS	ENSG00000236088
522	8734.76851831542	1.15272	1.15272	0.20504	0.0320311	6.40128	1.5408e-10	5.44181e-09	BCHE	590	BCHED	ENSG00000114200
523	729.05288944632	0.712359	1.40379	-0.489323	0.0764969	-6.39663	1.58844e-10	5.59933e-09	C17orf67	339210	C17orf67	ENSG00000214226
524	832.827280226043	0.754554	1.32529	-0.406304	0.0635677	-6.39167	1.64081e-10	5.77288e-09	MPP3	4356	DLG3	ENSG00000161647
525	153.990507201425	1.87325	1.87325	0.905545	0.141759	6.38793	1.68142e-10	5.90451e-09	CYP1A1	1543	AHH	ENSG00000140465
526	27824.0714682906	1.14231	1.14231	0.191958	0.0300745	6.38273	1.7396e-10	6.09721e-09	ACTN4	81	ACTININ-4	ENSG00000130402
527	358.070373635545	0.620033	1.61282	-0.689583	0.108124	-6.37772	1.79749e-10	6.28814e-09	STAG3L5P-PVRIG2P-PILRB	101752399	FDFACT	ENSG00000272752
528	337.560384322562	0.628718	1.59054	-0.669515	0.10499	-6.37696	1.80643e-10	6.30746e-09	#N/A	#N/A	#N/A	ENSG00000290989
529	3957.31944180316	1.21562	1.21562	0.281693	0.0441848	6.37533	1.82565e-10	6.36251e-09	PSPC1	55269	PSP1	ENSG00000121390
530	3779.42681725158	1.20299	1.20299	0.266625	0.0418441	6.37185	1.8676e-10	6.49641e-09	RHBDD2	57414	NPD007	ENSG00000005486
531	2298.05918050946	1.33249	1.33249	0.414124	0.065003	6.37085	1.87987e-10	6.5268e-09	TUBB4A	10382	DYT4	ENSG00000104833
532	319.332704071689	0.563612	1.77427	-0.827225	0.129856	-6.37031	1.88644e-10	6.53729e-09	#N/A	#N/A	#N/A	ENSG00000267519
533	980.767797696582	0.786095	1.27211	-0.347224	0.054518	-6.36898	1.9029e-10	6.58196e-09	#N/A	#N/A	#N/A	ENSG00000248092
534	15857.7514513517	1.15621	1.15621	0.209404	0.0328846	6.36784	1.91714e-10	6.6188e-09	MLEC	9761	KIAA0152	ENSG00000110917
535	1061.62091830069	0.742892	1.34609	-0.428775	0.0674333	-6.3585	2.03731e-10	7.02052e-09	SDHAP4	220729	SDHAP4	ENSG00000291091
536	1417.60145490791	0.762914	1.31076	-0.390407	0.0614928	-6.34883	2.16962e-10	7.46252e-09	ZNF141	7700	D4S90	ENSG00000131127
537	1150.96274885692	0.71636	1.39595	-0.481244	0.0758278	-6.34654	2.20206e-10	7.56001e-09	TUBGCP6	85378	GCP-6	ENSG00000128159
538	3019.96609657531	0.841776	1.18796	-0.248491	0.0391766	-6.34284	2.25573e-10	7.72987e-09	GATD1	347862	PDDC1	ENSG00000177225
539	3631.81386561677	0.838296	1.1929	-0.254469	0.0401224	-6.34232	2.26326e-10	7.74129e-09	NR4A1	3164	GFRP1	ENSG00000123358
540	1497.32731134321	0.791138	1.264	-0.337998	0.0533093	-6.34033	2.29267e-10	7.82736e-09	PGS1	9489	PGS1	ENSG00000087157
541	1888.45630822423	0.714798	1.399	-0.484392	0.0765484	-6.32792	2.48491e-10	8.46799e-09	#N/A	#N/A	#N/A	ENSG00000272822
542	1566.3512137565	0.719816	1.38924	-0.4743	0.0749714	-6.32642	2.50917e-10	8.5349e-09	ASB16-AS1	339201	C17orf65	ENSG00000267080
543	650.780639769747	0.625293	1.59925	-0.677395	0.107085	-6.32576	2.51987e-10	8.55548e-09	SLC25A27	9481	UCP4	ENSG00000153291
544	634.369706943635	0.750535	1.33238	-0.41401	0.0655109	-6.31971	2.62053e-10	8.88091e-09	WDR17	116966	WDR17	ENSG00000150627
545	2414.18853602783	0.786428	1.27157	-0.346613	0.054859	-6.31825	2.64547e-10	8.94897e-09	#N/A	#N/A	#N/A	ENSG00000290832
546	638.409104024101	1.35111	1.35111	0.434148	0.0687279	6.31691	2.66849e-10	8.99501e-09	RASGEF1A	221002	CG4853	ENSG00000198915
547	373.341352300217	0.617696	1.61892	-0.695031	0.110027	-6.31689	2.66884e-10	8.99501e-09	LINC00641	283624	LINC00641	ENSG00000258441
548	3094.99599590979	0.847619	1.17978	-0.238512	0.037768	-6.31518	2.69852e-10	9.07846e-09	C2CD3	26005	OFD14	ENSG00000168014
549	1995.03274696155	1.23567	1.23567	0.305294	0.0483544	6.31367	2.72486e-10	9.15037e-09	NUCB2	4925	HEL-S-109	ENSG00000070081
550	174.962240551469	1.84027	1.84027	0.87992	0.139388	6.31272	2.74165e-10	9.19e-09	VSTM2L	128434	C20orf102	ENSG00000132821
551	5185.15411524185	0.853539	1.17159	-0.22847	0.0361958	-6.31208	2.75312e-10	9.21171e-09	RC3H2	54542	MNAB	ENSG00000056586
552	3443.34552627051	1.22804	1.22804	0.296363	0.0469818	6.30803	2.82601e-10	9.43848e-09	GUK1	2987	GMK	ENSG00000143774
553	1510.51743377582	0.80262	1.24592	-0.317211	0.0503182	-6.3041	2.89865e-10	9.66356e-09	NDOR1	27158	CIAE1	ENSG00000188566
554	1500.17442241899	0.751671	1.33037	-0.411827	0.0653484	-6.30202	2.93789e-10	9.7767e-09	DMPK	1760	DM	ENSG00000104936
555	3965.43282693642	0.754499	1.32538	-0.406408	0.0645052	-6.3004	2.96886e-10	9.86196e-09	LOC124900275	124900275	LOC124900275	ENSG00000204054
556	200.463018934849	0.59228	1.68839	-0.755648	0.120028	-6.29562	3.06173e-10	1.01522e-08	#N/A	#N/A	#N/A	ENSG00000286451
557	2383.54513555412	1.25206	1.25206	0.324301	0.0515267	6.29383	3.09719e-10	1.02513e-08	GPAA1	8733	GAA1	ENSG00000197858
558	489.096362627157	0.684246	1.46146	-0.547414	0.0870425	-6.28904	3.19431e-10	1.05393e-08	MTG1	92170	GTP	ENSG00000148824
559	77.2231367141451	0.357042	2.80079	-1.48583	0.23626	-6.28898	3.19564e-10	1.05393e-08	#N/A	#N/A	#N/A	ENSG00000288919
560	279.485087513328	1.50642	1.50642	0.59112	0.0940781	6.28328	3.31494e-10	1.09133e-08	MT1A	4489	MT-1A	ENSG00000205362
561	4832.68431505582	0.84252	1.18692	-0.247217	0.0394084	-6.2732	3.53693e-10	1.16233e-08	GNL3L	54552	GNL3B	ENSG00000130119
562	653.244301133505	1.35522	1.35522	0.43853	0.0699142	6.2724	3.55532e-10	1.1663e-08	ID3	3399	HEIR-1	ENSG00000117318
563	8160.50763512584	0.865083	1.15596	-0.20909	0.0333691	-6.26599	3.70475e-10	1.21316e-08	DDX46	9879	PRPF5	ENSG00000145833
564	647.648116634527	0.745715	1.341	-0.423304	0.0675772	-6.26401	3.75209e-10	1.22648e-08	ZNF783	100289678	ZNF783	ENSG00000204946
565	7538.54806270795	1.18551	1.18551	0.245502	0.0391981	6.26311	3.77368e-10	1.23135e-08	EID1	23741	C15orf3	ENSG00000255302
566	480.568195282809	0.580714	1.72202	-0.784101	0.12526	-6.25981	3.85459e-10	1.25553e-08	ANKRD42-DT	100506282	ANKRD42-DT	ENSG00000247137
567	7104.41467625814	1.19314	1.19314	0.254761	0.0407209	6.25628	3.94273e-10	1.28198e-08	LAPTM4A	9741	HUMORF13	ENSG00000068697
568	84.8485731941816	0.42533	2.35112	-1.23335	0.197211	-6.25395	4.00188e-10	1.29892e-08	GAL3ST4	79690	GAL3ST-4	ENSG00000197093
569	3125.75869229208	1.21839	1.21839	0.284973	0.0455873	6.25115	4.07441e-10	1.32014e-08	ALDH3B1	221	ALDH4	ENSG00000006534
570	290.181827048151	0.606248	1.64949	-0.722021	0.115521	-6.25011	4.10151e-10	1.32426e-08	DNHD1	144132	C11orf47	ENSG00000179532
571	255.434806259367	0.574151	1.7417	-0.800499	0.128073	-6.25031	4.09634e-10	1.32426e-08	#N/A	#N/A	#N/A	ENSG00000246982
572	1465.77649865	1.25127	1.25127	0.323394	0.0518019	6.24289	4.29553e-10	1.38448e-08	TNFRSF21	27242	BM-018	ENSG00000146072
573	33380.1886256768	1.147	1.147	0.19786	0.0317825	6.22545	4.80188e-10	1.54498e-08	APLP2	334	APLP-2	ENSG00000084234
574	271.267263011369	0.552277	1.81069	-0.856537	0.137639	-6.22308	4.87479e-10	1.56571e-08	#N/A	#N/A	#N/A	ENSG00000259172
575	360.813674465094	0.642062	1.55748	-0.639215	0.102796	-6.21831	5.02553e-10	1.61131e-08	AP1G2-AS1	102724814	AP1G2-AS1	ENSG00000258727
576	2751.46306790818	0.839337	1.19142	-0.252678	0.0406548	-6.2152	5.12581e-10	1.64062e-08	PCF11	51585	PCF11	ENSG00000165494
577	4994.59103472948	1.19059	1.19059	0.251678	0.040503	6.21382	5.17113e-10	1.65225e-08	LMO7	4008	FBX20	ENSG00000136153
578	3293.06682874277	1.26492	1.26492	0.339048	0.0545889	6.21093	5.26734e-10	1.68008e-08	SH3BGRL3	83442	HEL-S-297	ENSG00000142669
579	122.444477062839	0.540638	1.84967	-0.887265	0.142909	-6.20862	5.34522e-10	1.70198e-08	MIRLET7A1HG	112903833	MIRLET7A1HG	ENSG00000269929
580	800.605546232438	1.31372	1.31372	0.393657	0.0634123	6.2079	5.36985e-10	1.70687e-08	SNTA1	6640	LQT12	ENSG00000101400
581	7613.26194295823	1.14592	1.14592	0.196505	0.0316572	6.20729	5.39075e-10	1.71057e-08	SDF4	51150	Cab45	ENSG00000078808
582	561.50267737123	0.713278	1.40198	-0.487463	0.0785398	-6.20657	5.41548e-10	1.71546e-08	ZNF519	162655	HsT2362	ENSG00000175322
583	3028.54073241793	0.791893	1.2628	-0.336622	0.0542479	-6.20526	5.46068e-10	1.72681e-08	COG8	84342	CDG2H	ENSG00000213380
584	129.026903821218	0.512685	1.95052	-0.963856	0.155437	-6.20095	5.61245e-10	1.77177e-08	SPINK4	27290	HEL136	ENSG00000122711
585	47.18152966763	0.360245	2.77589	-1.47295	0.237632	-6.19844	5.70263e-10	1.79716e-08	CA15P1	100996435	CA15P1	ENSG00000241527
586	34.9089826597609	0.277263	3.60668	-1.85067	0.298642	-6.19696	5.75642e-10	1.81101e-08	CASS4	57091	C20orf32	ENSG00000087589
587	7439.48752412568	1.23809	1.23809	0.308122	0.0497294	6.19597	5.7928e-10	1.81935e-08	NUCB1	4924	CALNUC	ENSG00000104805
588	333.348199803041	0.683641	1.46276	-0.548689	0.088625	-6.19114	5.9731e-10	1.87279e-08	P2RY11	5032	P2Y11	ENSG00000244165
589	2810.88756364264	1.24913	1.24913	0.320922	0.0518394	6.1907	5.98981e-10	1.87484e-08	FAM234A	83986	C16orf9	ENSG00000167930
590	264.680052479627	0.635781	1.57287	-0.653399	0.105551	-6.19037	6.00223e-10	1.87554e-08	ANKRD23	200539	DARP	ENSG00000163126
591	601.47682005992	1.35298	1.35298	0.436139	0.0704597	6.18991	6.01988e-10	1.87788e-08	ESRP2	80004	RBM35B	ENSG00000103067
592	736.741114236272	1.30278	1.30278	0.381588	0.0616722	6.18736	6.11783e-10	1.90521e-08	KCTD12	115207	C13orf2	ENSG00000178695
593	4432.09838627978	0.84615	1.18182	-0.241015	0.0389605	-6.18613	6.16578e-10	1.9169e-08	DMTF1	9988	DMP1	ENSG00000135164
594	808.170910812373	0.715101	1.3984	-0.483781	0.078246	-6.18283	6.29644e-10	1.95423e-08	PPP1R12B	4660	MYPT2	ENSG00000077157
595	6466.04459066167	1.15206	1.15206	0.20421	0.03305	6.17884	6.45757e-10	2.00087e-08	ITM2B	9445	ABRI	ENSG00000136156
596	1288.29832727063	0.770121	1.2985	-0.376843	0.0610334	-6.17437	6.64295e-10	2.05486e-08	LRRC14	9684	LRRC14A	ENSG00000160959
597	111.040299760651	0.51071	1.95806	-0.969425	0.157181	-6.16755	6.93563e-10	2.1418e-08	PTP4A1	7803	HH72	ENSG00000112245
598	3808.53079606207	1.253	1.253	0.325387	0.0528027	6.16232	7.16865e-10	2.21005e-08	HERPUD1	9709	HERP	ENSG00000051108
599	615.063095452093	0.711709	1.40507	-0.49064	0.0796578	-6.15935	7.30451e-10	2.24443e-08	#N/A	#N/A	#N/A	ENSG00000111788
600	107.065618797302	0.487302	2.05211	-1.03711	0.168377	-6.15946	7.2993e-10	2.24443e-08	#N/A	#N/A	#N/A	ENSG00000227953
601	1368.26529426825	1.37186	1.37186	0.456131	0.0740657	6.15846	7.34536e-10	2.25323e-08	#N/A	#N/A	#N/A	ENSG00000258017
602	2011.50036961267	0.828626	1.20682	-0.271207	0.0440498	-6.15682	7.42199e-10	2.27295e-08	ANAPC2	29882	APC2	ENSG00000176248
603	1436.17134501492	1.27508	1.27508	0.350584	0.056971	6.15373	7.5683e-10	2.31392e-08	CAV2	858	CAV	ENSG00000105971
604	241.498166837681	1.62275	1.62275	0.69844	0.113506	6.15333	7.58727e-10	2.31587e-08	MMP24	10893	MMP-24	ENSG00000125966
605	1509.49987161915	1.25397	1.25397	0.326504	0.0530731	6.15198	7.65236e-10	2.33188e-08	MORC4	79710	ZCW4	ENSG00000133131
606	109.777147379712	0.46495	2.15077	-1.10485	0.179601	-6.15171	7.66533e-10	2.33198e-08	#N/A	#N/A	#N/A	ENSG00000267546
607	7573.99980216659	1.18292	1.18292	0.242347	0.0393989	6.15112	7.69386e-10	2.33681e-08	TMEM214	54867	TMEM214	ENSG00000119777
608	1740.5636368334	1.26997	1.26997	0.344792	0.0560568	6.15076	7.71127e-10	2.33824e-08	TCEAL3	85012	WEX8	ENSG00000196507
609	2395.34267305132	0.810079	1.23445	-0.303866	0.0494258	-6.14792	7.85069e-10	2.37661e-08	ZBTB1	22890	ZNF909	ENSG00000126804
610	22651.4429928518	1.14756	1.14756	0.198567	0.0323031	6.14702	7.89545e-10	2.38624e-08	FADS1	3992	D5D	ENSG00000149485
611	781.340299788384	1.31219	1.31219	0.391972	0.0637811	6.14559	7.96655e-10	2.40379e-08	CCDC71	64925	CCDC71	ENSG00000177352
612	5239.07518940909	0.866007	1.15472	-0.207549	0.033798	-6.14085	8.20797e-10	2.47258e-08	AGAP3	116988	AGAP-3	ENSG00000133612
613	2192.98075594174	1.21154	1.21154	0.276838	0.0450974	6.13866	8.32195e-10	2.50283e-08	RHOC	389	ARH9	ENSG00000155366
614	8095.73096851528	1.15558	1.15558	0.208621	0.0340009	6.13575	8.47578e-10	2.54494e-08	RAB6A	5870	RAB6	ENSG00000175582
615	225.918407836533	0.569803	1.75499	-0.811466	0.132376	-6.13002	8.78668e-10	2.634e-08	CFAP44	55779	SPGF20	ENSG00000206530
616	8181.17823083276	1.16628	1.16628	0.22192	0.0362267	6.12585	9.01994e-10	2.69517e-08	SLC25A39	51629	CGI-69	ENSG00000013306
617	909.559434110744	1.33389	1.33389	0.415643	0.0678481	6.12609	9.00672e-10	2.69517e-08	MFSD3	113655	SLC33A2	ENSG00000167700
618	698.152845001212	1.33833	1.33833	0.420436	0.0686796	6.1217	9.25794e-10	2.7618e-08	CSPG5	10675	NGC	ENSG00000114646
619	131.002466267137	0.537374	1.8609	-0.896001	0.146589	-6.11235	9.81768e-10	2.92405e-08	GNB3	2784	CSNB1H	ENSG00000111664
620	1006.1925670765	0.76357	1.30964	-0.389168	0.063674	-6.11188	9.84661e-10	2.92794e-08	RABEPK	10244	RAB9P40	ENSG00000136933
621	558.754815696401	0.741896	1.3479	-0.43071	0.0704925	-6.11002	9.96198e-10	2.95504e-08	PRELID3A	10650	C18orf43	ENSG00000141391
622	2127.14798205302	1.22144	1.22144	0.288579	0.0472334	6.10964	9.98585e-10	2.95504e-08	EDIL3	10085	DEL1	ENSG00000164176
623	2705.97322465038	1.29269	1.29269	0.37038	0.0606207	6.1098	9.97592e-10	2.95504e-08	HLA-E	3133	HLA-6.2	ENSG00000204592
624	6317.54629756805	1.19409	1.19409	0.255917	0.0419203	6.10486	1.0289e-09	3.03988e-08	LMBR1	64327	ACHP	ENSG00000105983
625	786.079538850214	0.766322	1.30493	-0.383977	0.0629361	-6.10106	1.05369e-09	3.10812e-08	ACAP3	116983	CENTB5	ENSG00000131584
626	372.6260493325	0.596802	1.6756	-0.744677	0.122096	-6.0991	1.06664e-09	3.14131e-08	CROCCP3	114819	CROCCL2	ENSG00000290842
627	15711.7392276137	0.829627	1.20536	-0.269465	0.044203	-6.09609	1.08695e-09	3.196e-08	SYNE1	23345	8B	ENSG00000131018
628	2532.00574515664	1.20588	1.20588	0.270082	0.0443265	6.09301	1.10808e-09	3.25296e-08	MPG	4350	AAG	ENSG00000103152
629	349.355268118338	0.703344	1.42178	-0.507698	0.0833464	-6.09143	1.1191e-09	3.28008e-08	C3orf62	375341	MAPS	ENSG00000188315
630	1519.2496510478	1.22185	1.22185	0.289072	0.047493	6.08662	1.15317e-09	3.37458e-08	SLC16A13	201232	MCT13	ENSG00000174327
631	8173.6103962322	1.18889	1.18889	0.249611	0.0410188	6.08528	1.16286e-09	3.39755e-08	ITM2C	81618	BRI3	ENSG00000135916
632	7102.03409749606	0.859717	1.16317	-0.218067	0.0358632	-6.08052	1.19795e-09	3.49452e-08	RIMOC1	285636	C5orf51	ENSG00000205765
633	248.650187656653	1.59597	1.59597	0.67443	0.110994	6.0763	1.22989e-09	3.58202e-08	NUDT8	254552	NUDT8	ENSG00000167799
634	666.870679670934	0.731154	1.3677	-0.451753	0.0744197	-6.07035	1.27632e-09	3.71141e-08	NBPF11	200030	NBPF24	ENSG00000263956
635	872.466161795629	0.778295	1.28486	-0.361612	0.0596	-6.06731	1.3007e-09	3.77632e-08	RPAP2	79871	C1orf82	ENSG00000122484
636	504.491780646622	1.35586	1.35586	0.439209	0.072421	6.06466	1.32232e-09	3.83306e-08	GPR160	26996	GPCR1	ENSG00000173890
637	1636.74298716478	0.774387	1.29134	-0.368874	0.0608568	-6.06134	1.3499e-09	3.90688e-08	XPNPEP3	63929	APP3	ENSG00000196236
638	33077.8310750178	0.835647	1.19668	-0.259035	0.0427621	-6.05758	1.38189e-09	3.99318e-08	DYNC1H1	1778	CDCBM13	ENSG00000197102
639	999.999448424218	1.29523	1.29523	0.373209	0.0616204	6.05657	1.39053e-09	4.01188e-08	LRFN1	57622	SALM2	ENSG00000128011
640	1069.83363883425	1.27045	1.27045	0.345345	0.0570937	6.04874	1.45982e-09	4.20519e-08	MGMT	4255	MGMT	ENSG00000170430
641	3204.0034501794	1.20923	1.20923	0.274093	0.0453163	6.04844	1.46255e-09	4.20648e-08	ERG28	11161	C14orf1	ENSG00000133935
642	719.656194779517	0.751122	1.33134	-0.41288	0.0683475	-6.0409	1.53261e-09	4.4008e-08	SMOX	54498	C20orf16	ENSG00000088826
643	1435.17874730264	0.787929	1.26915	-0.343862	0.0569247	-6.04066	1.53488e-09	4.4008e-08	ZNF692	55657	AREBP	ENSG00000171163
644	685.653803551893	0.740781	1.34993	-0.432881	0.0716725	-6.0397	1.54399e-09	4.42002e-08	ACCS	84680	ACS	ENSG00000110455
645	4108.80709620532	1.17942	1.17942	0.23808	0.0394771	6.03083	1.63115e-09	4.66232e-08	NXN	64359	NRX	ENSG00000167693
646	257.138880490476	0.629303	1.58906	-0.668173	0.110939	-6.02289	1.7133e-09	4.88701e-08	CCDC150	284992	CCDC150	ENSG00000144395
647	1535.90385296285	1.24341	1.24341	0.314308	0.052187	6.02272	1.71506e-09	4.88701e-08	POMGNT2	84892	AGO61	ENSG00000144647
648	392.963696069246	0.720544	1.38784	-0.472841	0.0785256	-6.02149	1.72814e-09	4.91667e-08	TMCC1-DT	100507032	TMCC1-AS1	ENSG00000271270
649	5695.37479612853	1.2023	1.2023	0.265802	0.0441585	6.01929	1.75187e-09	4.96884e-08	SLC25A1	6576	CIC	ENSG00000100075
650	2014.94666544406	1.20102	1.20102	0.264258	0.0439018	6.01929	1.75181e-09	4.96884e-08	CHSY1	22856	CHSY	ENSG00000131873
651	4352.15532594302	1.17485	1.17485	0.232477	0.0386478	6.01525	1.79606e-09	5.08636e-08	MAPK3	5595	ERK-1	ENSG00000102882
652	85812.5414586763	1.15868	1.15868	0.212488	0.0353339	6.01372	1.81315e-09	5.12687e-08	ACTG1	71	ACT	ENSG00000184009
653	84.9581445900495	0.442534	2.25971	-1.17614	0.195597	-6.01309	1.82024e-09	5.13904e-08	RPL12P37	100129801	RPL12_18_1579	ENSG00000240270
654	1771.57913033839	1.27956	1.27956	0.355653	0.0591913	6.00853	1.87214e-09	5.2775e-08	TNS3	64759	TEM6	ENSG00000136205
655	188.849926577005	0.483498	2.06826	-1.04842	0.174498	-6.00821	1.87582e-09	5.27978e-08	#N/A	#N/A	#N/A	ENSG00000229127
656	150.28538276283	0.596047	1.67772	-0.746503	0.124256	-6.0078	1.88056e-09	5.28507e-08	#N/A	#N/A	#N/A	ENSG00000246334
657	13235.0919138778	1.17452	1.17452	0.232074	0.0386428	6.00561	1.90611e-09	5.34872e-08	MYL9	10398	LC20	ENSG00000101335
658	902.27745087164	1.27233	1.27233	0.347478	0.0578791	6.00351	1.93096e-09	5.4102e-08	BTG1	694	APRO2	ENSG00000133639
659	254.529967259341	0.644119	1.55251	-0.6346	0.105726	-6.00233	1.94512e-09	5.4416e-08	SLC16A1-AS1	100506392	SLC16A1-AS1	ENSG00000226419
660	311.209951425106	0.649164	1.54044	-0.623345	0.103882	-6.00049	1.96719e-09	5.49501e-08	RPL13AP20	387841	HANR	ENSG00000234498
661	1373.20372588874	1.34885	1.34885	0.431734	0.0719549	6.00006	1.97241e-09	5.50126e-08	S100A10	6281	42C	ENSG00000197747
662	2647.60607321891	0.83832	1.19286	-0.254427	0.0424101	-5.9992	1.9829e-09	5.52218e-08	AGL	178	GDE	ENSG00000162688
663	143.378899705926	0.506774	1.97327	-0.980585	0.16348	-5.99819	1.99532e-09	5.54837e-08	#N/A	#N/A	#N/A	ENSG00000290870
664	1053.25372338712	0.794335	1.25891	-0.33218	0.0554013	-5.99589	2.02372e-09	5.61888e-08	TOP3B	8940	TOP3B1	ENSG00000100038
665	190.962545166806	0.593312	1.68545	-0.753137	0.125661	-5.99338	2.05526e-09	5.69785e-08	KCNT2	343450	DEE57	ENSG00000162687
666	11326.2977272588	1.16849	1.16849	0.224648	0.0375199	5.98744	2.13168e-09	5.90084e-08	EIF4A2	1974	BM-010	ENSG00000156976
667	2712.97921057818	1.22119	1.22119	0.288288	0.0481573	5.98639	2.1455e-09	5.93019e-08	SLC25A11	8402	OGC	ENSG00000108528
668	862.160112374439	0.767216	1.30341	-0.382295	0.0638636	-5.98611	2.14913e-09	5.93135e-08	ZNF248	57209	bA162G10.3	ENSG00000198105
669	7436.4858486579	1.15356	1.15356	0.206089	0.0344295	5.98583	2.15292e-09	5.93293e-08	OS9	10956	ERLEC2	ENSG00000135506
670	14299.475941907	1.12944	1.12944	0.175613	0.0293568	5.98201	2.20399e-09	6.06458e-08	GNB1	2782	HG2A	ENSG00000078369
671	26571.6039711458	0.87383	1.14439	-0.194575	0.0325318	-5.98106	2.21686e-09	6.09091e-08	SQSTM1	8878	A170	ENSG00000161011
672	394.514161375265	0.693929	1.44107	-0.52714	0.0881467	-5.98026	2.22787e-09	6.11207e-08	AP4B1	10717	BETA-4	ENSG00000134262
673	7703.59239995175	1.20621	1.20621	0.270484	0.0452727	5.97454	2.30734e-09	6.32068e-08	PIGT	51604	CGI-06	ENSG00000124155
674	239.967718048958	1.51741	1.51741	0.601615	0.100726	5.9728	2.33221e-09	6.37932e-08	CDA	978	CDD	ENSG00000158825
675	229.822515793419	0.626529	1.59609	-0.674546	0.11297	-5.971	2.35798e-09	6.44026e-08	KPTN	11133	2E4	ENSG00000118162
676	1796.21868434885	1.2191	1.2191	0.285819	0.0478877	5.96853	2.39402e-09	6.52901e-08	TCEAL8	90843	WEX3	ENSG00000180964
677	834.240482869782	0.729627	1.37056	-0.45477	0.0762948	-5.9607	2.51165e-09	6.8397e-08	TSTD3	100130890	TSTD3	ENSG00000279170
678	12595.2408139378	1.14403	1.14403	0.19413	0.0325983	5.95522	2.5972e-09	7.06223e-08	NFE2L1	4779	LCR-F1	ENSG00000082641
679	668.023639547002	0.731602	1.36686	-0.450869	0.0757196	-5.95446	2.60931e-09	7.08473e-08	AJM1	389813	C9orf172	ENSG00000232434
680	1703.06718181034	1.28586	1.28586	0.362739	0.0609268	5.95368	2.62179e-09	7.10814e-08	REEP6	92840	C19orf32	ENSG00000115255
681	1259.73554713252	0.803692	1.24426	-0.315285	0.0529668	-5.9525	2.64083e-09	7.14925e-08	CEP95	90799	CCDC45	ENSG00000258890
682	97.6196677373302	0.495644	2.01758	-1.01262	0.170223	-5.94879	2.7014e-09	7.30249e-08	TMEM11-DT	107984969	TMEM11-DT	ENSG00000235530
683	3553.61637134799	1.18784	1.18784	0.248345	0.0417607	5.94686	2.73327e-09	7.37783e-08	GOLGA5	9950	GOLIM5	ENSG00000066455
684	2507.53586235454	0.830778	1.20369	-0.267465	0.0449836	-5.94583	2.75056e-09	7.41364e-08	BIRC2	329	API1	ENSG00000110330
685	1070.35004946189	0.695469	1.43788	-0.523942	0.088127	-5.94531	2.7594e-09	7.42662e-08	LOC102724428	102724428	SIK	ENSG00000275993
686	900.749607433914	1.38712	1.38712	0.472092	0.0794459	5.94231	2.81031e-09	7.55261e-08	CLDN3	1365	C7orf1	ENSG00000165215
687	2206.113921834	0.839429	1.19129	-0.25252	0.0425141	-5.93966	2.85607e-09	7.65327e-08	GBA2	57704	AD035	ENSG00000070610
688	779.132985045274	0.768414	1.30138	-0.380044	0.0639837	-5.93971	2.85529e-09	7.65327e-08	#N/A	#N/A	#N/A	ENSG00000224817
689	4318.23447610287	1.20472	1.20472	0.268698	0.0452605	5.93669	2.90834e-09	7.76002e-08	JMJD8	339123	C16orf20	ENSG00000161999
690	756.706837890602	0.776778	1.28737	-0.364426	0.0613852	-5.9367	2.90819e-09	7.76002e-08	UQCC5	440957	C3orf78	ENSG00000168273
691	111.181315981213	0.515924	1.93827	-0.95477	0.160826	-5.93668	2.90854e-09	7.76002e-08	SMG1P7	100506060	SMG1P7	ENSG00000261556
692	7326.38528120818	1.17679	1.17679	0.234858	0.039575	5.93451	2.94719e-09	7.8518e-08	EIF3F	8665	EIF3S5	ENSG00000175390
693	1538.4357410849	1.24114	1.24114	0.311664	0.0525315	5.93289	2.97644e-09	7.91826e-08	KDM3A	55818	JHDM2A	ENSG00000115548
694	3521.15357593764	1.17913	1.17913	0.237725	0.0400971	5.92873	3.05296e-09	8.11013e-08	OGFRL1	79627	dJ331H24.1	ENSG00000119900
695	919.708978866791	1.36894	1.36894	0.453058	0.0764667	5.9249	3.12483e-09	8.28913e-08	TUBB2B	347733	CDCBM7	ENSG00000137285
696	4768.14521221047	1.14944	1.14944	0.200936	0.0339188	5.92403	3.14146e-09	8.32125e-08	AHCYL1	10768	DCAL	ENSG00000168710
697	29322.4326276044	0.88756	1.12668	-0.172083	0.0290599	-5.92167	3.18685e-09	8.42938e-08	PRPF8	10594	HPRP8	ENSG00000174231
698	323.770264035794	1.50839	1.50839	0.59301	0.100234	5.91623	3.29407e-09	8.70051e-08	GPCPD1	56261	EDI3	ENSG00000125772
699	1076.82949516815	0.722715	1.38367	-0.468501	0.0792103	-5.91465	3.32587e-09	8.77192e-08	#N/A	#N/A	#N/A	ENSG00000290792
700	2149.4924799168	1.25018	1.25018	0.322134	0.054481	5.91278	3.36381e-09	8.85932e-08	NMRAL1	57407	HSCARG	ENSG00000153406
701	2974.14032865401	1.18943	1.18943	0.250274	0.0423366	5.91152	3.38968e-09	8.91471e-08	PTGES2	80142	C9orf15	ENSG00000148334
702	425.20020025101	0.685706	1.45835	-0.544338	0.0921556	-5.90672	3.48986e-09	9.16511e-08	RNPC3	55599	CPHD7	ENSG00000185946
703	1959.87816958695	1.22554	1.22554	0.293419	0.0496958	5.90431	3.54123e-09	9.2868e-08	KLF6	1316	BCD1	ENSG00000067082
704	14639.3674863071	1.14327	1.14327	0.193171	0.032752	5.89799	3.67965e-09	9.63609e-08	ARCN1	372	COPD	ENSG00000095139
705	4369.09699872267	1.19089	1.19089	0.252043	0.0427514	5.89555	3.73429e-09	9.76531e-08	MELTF	4241	CD228	ENSG00000163975
706	110370.457082282	1.21757	1.21757	0.28401	0.0481989	5.89245	3.8051e-09	9.93637e-08	GAPDH	2597	G3PD	ENSG00000111640
707	848.731714468698	1.29026	1.29026	0.367659	0.0624339	5.88877	3.8907e-09	1.01312e-07	STING1	340061	ERIS	ENSG00000184584
708	50.3118923769537	0.407538	2.45376	-1.29499	0.219904	-5.8889	3.88774e-09	1.01312e-07	LINC03016	101927354	LINC03016	ENSG00000230825
709	418.523976531618	0.719685	1.3895	-0.474562	0.0806075	-5.88731	3.92528e-09	1.02068e-07	ATXN7L2	127002	ATXN7L2	ENSG00000162650
710	270.820457375144	0.65822	1.51925	-0.603359	0.102614	-5.87987	4.10593e-09	1.06615e-07	#N/A	#N/A	#N/A	ENSG00000260565
711	2819.10797731193	1.20139	1.20139	0.2647	0.0450457	5.87626	4.19635e-09	1.0881e-07	ARL6IP5	10550	DERP11	ENSG00000144746
712	11823.9578369826	1.14668	1.14668	0.197457	0.0336209	5.87305	4.27839e-09	1.10781e-07	SSR1	6745	TRAPA	ENSG00000124783
713	2527.33263885771	1.25479	1.25479	0.327443	0.0557586	5.87251	4.29244e-09	1.10989e-07	MYL6B	140465	MLC1SA	ENSG00000196465
714	766.053134468873	0.649482	1.53969	-0.62264	0.106079	-5.86958	4.36907e-09	1.12813e-07	RBM4	5936	LARK	ENSG00000173933
715	265.826890730127	0.632308	1.58151	-0.661301	0.112685	-5.86859	4.39529e-09	1.13331e-07	TIGD7	91151	Sancho	ENSG00000140993
716	2973.38341305998	0.828067	1.20763	-0.27218	0.0463914	-5.86703	4.43667e-09	1.14079e-07	RBM19	9904	Mrd1	ENSG00000122965
717	2407.92978676616	0.842781	1.18655	-0.24677	0.0420602	-5.86706	4.43588e-09	1.14079e-07	WASHC2C	253725	FAM21A	ENSG00000172661
718	9937.80016112225	1.14693	1.14693	0.197783	0.0337196	5.86551	4.47758e-09	1.1497e-07	ABCA2	20	ABC2	ENSG00000107331
719	1220.15753107502	0.820297	1.21907	-0.285782	0.048727	-5.86496	4.49246e-09	1.15192e-07	CCDC142	84865	CCDC142	ENSG00000135637
720	1679.89778396393	0.818685	1.22147	-0.28862	0.0492333	-5.86229	4.56528e-09	1.16897e-07	DBF4B	80174	ASKL1	ENSG00000161692
721	689.177390939698	0.737254	1.35638	-0.439765	0.0750257	-5.86153	4.58623e-09	1.1727e-07	#N/A	#N/A	#N/A	ENSG00000279726
722	102.662079794825	1.94269	1.94269	0.958059	0.163481	5.86036	4.61873e-09	1.17937e-07	CCBE1	147372	HKLLS1	ENSG00000183287
723	931.001537439996	0.742634	1.34656	-0.429277	0.0733396	-5.85328	4.81958e-09	1.22896e-07	POLG2	11232	HP55	ENSG00000256525
724	27244.4412500051	1.17425	1.17425	0.231745	0.0396086	5.85086	4.89038e-09	1.24529e-07	MDH2	4191	DEE51	ENSG00000146701
725	882.371361985736	0.782745	1.27756	-0.353386	0.0604134	-5.84946	4.93159e-09	1.25405e-07	ATAD5	79915	C17orf41	ENSG00000176208
726	4314.6771898463	1.21408	1.21408	0.279867	0.0478612	5.84747	4.99092e-09	1.26739e-07	HBS1L	10767	EF-1a	ENSG00000112339
727	684.125820742955	1.36635	1.36635	0.45033	0.0770318	5.84603	5.03451e-09	1.27495e-07	OTULINL	54491	FAM105A	ENSG00000145569
728	111.110079845873	0.542014	1.84497	-0.883599	0.151143	-5.84612	5.03176e-09	1.27495e-07	#N/A	#N/A	#N/A	ENSG00000259349
729	35.8005913796147	0.341546	2.92786	-1.54985	0.2652	-5.84408	5.09382e-09	1.2882e-07	LINC02999	102546229	LINC02999	ENSG00000250564
730	1257.67831015172	1.25382	1.25382	0.326333	0.055866	5.84135	5.17796e-09	1.30768e-07	PACSIN3	29763	SDPIII	ENSG00000165912
731	2024.63098432856	1.22193	1.22193	0.289165	0.0495817	5.83209	5.47363e-09	1.38046e-07	CAVIN2	8436	PS-p68	ENSG00000168497
732	1693.51644369768	1.23276	1.23276	0.301891	0.0517658	5.83185	5.48146e-09	1.38055e-07	KRT19	3880	CK19	ENSG00000171345
733	199.317132062482	1.61765	1.61765	0.693903	0.118995	5.83134	5.49825e-09	1.38289e-07	GALNT16	57452	GALNACT16	ENSG00000100626
734	1302.08580554637	1.24189	1.24189	0.312539	0.0536616	5.82425	5.7369e-09	1.43899e-07	ATP9A	10079	ATPIIA	ENSG00000054793
735	1245.06990044408	1.24905	1.24905	0.320833	0.0550846	5.82438	5.73264e-09	1.43899e-07	TSKU	25987	E2IG4	ENSG00000182704
736	1079.35522543701	1.25536	1.25536	0.328103	0.056357	5.82187	5.81921e-09	1.45765e-07	WIPI1	55062	ATG18	ENSG00000070540
737	1385.0673939606	1.27097	1.27097	0.345932	0.0594577	5.81812	5.95125e-09	1.4887e-07	SRBD1	55133	SRBD1	ENSG00000068784
738	159.113233756319	0.555272	1.80092	-0.848734	0.145908	-5.81693	5.99386e-09	1.49733e-07	#N/A	#N/A	#N/A	ENSG00000236209
739	1984.62724068794	0.771254	1.29659	-0.374723	0.0644291	-5.81605	6.02548e-09	1.50319e-07	ANKRD13D	338692	ANKRD13D	ENSG00000172932
740	195.416341862544	0.608134	1.64437	-0.717538	0.123498	-5.8101	6.24356e-09	1.55549e-07	LCAT	3931	LCAT	ENSG00000213398
741	3159.33826568668	1.18384	1.18384	0.24348	0.0419283	5.80705	6.35816e-09	1.5819e-07	S100A16	140576	AAG13	ENSG00000188643
742	83.2876578070745	2.10873	2.10873	1.07637	0.185434	5.8046	6.45215e-09	1.60312e-07	SMIM10L2B	644596	LINC00086	ENSG00000196972
743	4508.74169484795	1.20771	1.20771	0.272274	0.0469313	5.80156	6.57027e-09	1.63028e-07	APEH	327	AARE	ENSG00000164062
744	1250.50926610877	0.77763	1.28596	-0.362843	0.0625605	-5.79988	6.63609e-09	1.6444e-07	MKNK1	8569	MNK1	ENSG00000079277
745	1723.9263533863	0.824859	1.21233	-0.277781	0.0479086	-5.79815	6.70497e-09	1.65923e-07	BRAT1	221927	BAAT1	ENSG00000106009
746	1264.57392664102	1.26164	1.26164	0.335301	0.0578364	5.7974	6.73496e-09	1.66442e-07	CTC1	80169	AAF-132	ENSG00000178971
747	2776.4095153131	1.21287	1.21287	0.278425	0.0480696	5.79211	6.95079e-09	1.71546e-07	DUSP5	1847	DUSP	ENSG00000138166
748	4027.81748831427	1.20702	1.20702	0.27145	0.0468726	5.79123	6.9872e-09	1.72167e-07	QSOX1	5768	Q6	ENSG00000116260
749	5457.64602754595	1.23526	1.23526	0.304812	0.052635	5.79105	6.99465e-09	1.72167e-07	YWHAH	7533	YWHA1	ENSG00000128245
750	602.099013501091	0.7383	1.35446	-0.437721	0.0755891	-5.7908	7.00524e-09	1.72198e-07	ZNF431	170959	ZFP932	ENSG00000196705
751	129.379408763657	0.482771	2.07138	-1.05059	0.181489	-5.78872	7.09252e-09	1.74112e-07	#N/A	#N/A	#N/A	ENSG00000285796
752	2008.42421630573	1.22282	1.22282	0.290209	0.0501604	5.78562	7.2245e-09	1.76901e-07	COG6	57511	CDG2L	ENSG00000133103
753	44.90587960317	0.375414	2.66373	-1.41345	0.244304	-5.7856	7.22534e-09	1.76901e-07	KIAA1614	57710	KIAA1614	ENSG00000135835
754	1039.41418352927	1.28719	1.28719	0.364224	0.0629717	5.78393	7.2976e-09	1.78433e-07	TUBA4A	7277	ALS22	ENSG00000127824
755	36860.5057641497	1.22135	1.22135	0.288482	0.0499342	5.77724	7.5934e-09	1.8542e-07	RPS11	6205	S11	ENSG00000142534
756	3696.09424504567	1.24453	1.24453	0.315599	0.0546628	5.77357	7.76101e-09	1.89262e-07	ECH1	1891	HPXEL	ENSG00000104823
757	2623.52902739569	0.842725	1.18663	-0.246866	0.0427643	-5.7727	7.80113e-09	1.89989e-07	CASZ1	54897	CAS11	ENSG00000130940
758	209.983210537818	0.609172	1.64157	-0.715079	0.123896	-5.77159	7.85261e-09	1.9099e-07	FAM227A	646851	FAM227A	ENSG00000184949
759	20163.6310051893	1.15456	1.15456	0.207346	0.0359435	5.76866	7.99045e-09	1.94087e-07	ARF1	375	PVNH8	ENSG00000143761
760	2913.72757101073	0.84516	1.18321	-0.242703	0.0421063	-5.76405	8.21205e-09	1.98945e-07	THOC1	9984	DFNA86	ENSG00000079134
761	1539.51088593464	1.26346	1.26346	0.337383	0.0585302	5.76425	8.20227e-09	1.98945e-07	CETN2	1069	CALT	ENSG00000147400
762	255.050204679724	0.669136	1.49446	-0.579629	0.100666	-5.75792	8.51546e-09	2.06025e-07	ZDHHC12-DT	100506100	ZDHHC12-DT	ENSG00000223478
763	760.30145244596	1.29428	1.29428	0.372146	0.0646371	5.75746	8.53874e-09	2.06318e-07	TIMM22	29928	COXPD43	ENSG00000177370
764	773.029202663026	0.770694	1.29753	-0.37577	0.0652699	-5.75717	8.55374e-09	2.06409e-07	TBCK	93627	HSPC302	ENSG00000145348
765	473.477130727955	1.3399	1.3399	0.422123	0.0733296	5.75651	8.5871e-09	2.06943e-07	RETREG1	54463	FAM134B	ENSG00000154153
766	2731.56847462256	1.18546	1.18546	0.245449	0.0426774	5.75125	8.85864e-09	2.13209e-07	P3H4	10609	LEPREL4	ENSG00000141696
767	5080.73319396076	0.750877	1.33178	-0.413351	0.0718855	-5.75014	8.91719e-09	2.14338e-07	RUNX1	861	AML1	ENSG00000159216
768	41.9277842402181	0.339078	2.94918	-1.56031	0.27146	-5.74786	9.0381e-09	2.16961e-07	TP53AIP1	63970	P53AIP1	ENSG00000120471
769	5882.06021800152	1.17384	1.17384	0.231232	0.0402626	5.7431	9.29601e-09	2.22862e-07	SLC35B2	347734	HLD26	ENSG00000157593
770	2085.36135592687	0.835297	1.19718	-0.259638	0.0452239	-5.74117	9.40225e-09	2.25117e-07	ENOSF1	55556	FUCD	ENSG00000132199
771	547.534258834778	0.666649	1.50004	-0.585	0.101952	-5.73797	9.58178e-09	2.28821e-07	MCOLN3	55283	TRP-ML3	ENSG00000055732
772	2005.62962192659	1.22684	1.22684	0.294943	0.0514	5.73819	9.56945e-09	2.28821e-07	YIF1B	90522	FinGER8	ENSG00000167645
773	3352.14255715695	0.853858	1.17115	-0.227932	0.0397663	-5.73178	9.93823e-09	2.37026e-07	FNBP4	23360	FBP30	ENSG00000109920
774	1914.95686580915	0.811757	1.2319	-0.30088	0.0525031	-5.7307	1.00016e-08	2.38228e-07	RBM5	10181	G15	ENSG00000003756
775	5590.4731861334	1.20114	1.20114	0.264407	0.0461735	5.72639	1.02592e-08	2.44049e-07	CD99	4267	HBA71	ENSG00000002586
776	617.49528995023	0.721946	1.38514	-0.470036	0.0821977	-5.71836	1.07556e-08	2.5553e-07	ZNF234	10780	HZF4	ENSG00000263002
777	1165.73714479864	0.753439	1.32725	-0.408437	0.0714385	-5.71731	1.08221e-08	2.56777e-07	KCTD13	253980	BACURD1	ENSG00000174943
778	4269.84844557483	0.854526	1.17024	-0.226804	0.0396753	-5.7165	1.08742e-08	2.57496e-07	BTAF1	9044	MOT1	ENSG00000095564
779	1326.9262273156	0.53735	1.86098	-0.896066	0.156753	-5.7164	1.08803e-08	2.57496e-07	#N/A	#N/A	#N/A	ENSG00000262001
780	2000.74090773164	0.821633	1.21709	-0.283434	0.0496748	-5.70579	1.15804e-08	2.73713e-07	SH3YL1	26751	RAY	ENSG00000035115
781	11432.8559624374	1.1479	1.1479	0.198998	0.034899	5.7021	1.18339e-08	2.79111e-07	STT3A	3703	CDG1WAD	ENSG00000134910
782	138.879098227984	0.536031	1.86557	-0.899613	0.157771	-5.70203	1.1839e-08	2.79111e-07	TRIM73	375593	TRIM50B	ENSG00000178809
783	2017.46402879219	1.20294	1.20294	0.266568	0.0467664	5.7	1.19806e-08	2.82088e-07	PRSS23	11098	SIG13	ENSG00000150687
784	723.008185152253	0.751668	1.33037	-0.411833	0.0722935	-5.69668	1.22166e-08	2.87276e-07	ZNF767P	79970	ZNF767	ENSG00000291118
785	510.052539943989	1.49354	1.49354	0.578736	0.101692	5.69107	1.26242e-08	2.96484e-07	#N/A	#N/A	#N/A	ENSG00000258232
786	4278.29959571732	0.821311	1.21757	-0.283999	0.0499198	-5.68911	1.27703e-08	2.99533e-07	CHD2	1106	DEE94	ENSG00000173575
787	18549.7702906247	1.16271	1.16271	0.217493	0.0382749	5.68239	1.32822e-08	3.10879e-07	TAGLN2	8407	HA1756	ENSG00000158710
788	142.240274369986	0.566874	1.76406	-0.818901	0.144114	-5.6823	1.32896e-08	3.10879e-07	WDR45	11152	JM5	ENSG00000196998
789	601.683122248991	0.679667	1.47131	-0.5571	0.0980447	-5.68211	1.33046e-08	3.10879e-07	#N/A	#N/A	#N/A	ENSG00000259972
790	1699.48753406491	0.775556	1.2894	-0.366698	0.0645456	-5.68122	1.33738e-08	3.12101e-07	TARBP1	6894	TRM3	ENSG00000059588
791	249.561430437923	0.597143	1.67464	-0.743852	0.130946	-5.68059	1.34229e-08	3.1285e-07	DPY19L3-DT	400684	DPY19L3-DT	ENSG00000267213
792	1095.11104383415	1.30787	1.30787	0.387222	0.0681837	5.6791	1.35402e-08	3.15187e-07	GALNT18	374378	GALNACT18	ENSG00000110328
793	2847.56712590396	0.844176	1.18459	-0.244384	0.0430608	-5.67533	1.38423e-08	3.21812e-07	PURB	5814	PURBETA	ENSG00000146676
794	5926.21208678101	0.862041	1.16004	-0.214171	0.037749	-5.67355	1.39867e-08	3.24759e-07	SRSF11	9295	NET2	ENSG00000116754
795	2351.67903787651	1.19629	1.19629	0.25857	0.0455983	5.6706	1.42296e-08	3.29983e-07	IGSF8	93185	CD316	ENSG00000162729
796	10314.645573311	1.12063	1.12063	0.164305	0.0290328	5.65931	1.51984e-08	3.52007e-07	COPG1	22820	COPG	ENSG00000181789
797	1524.61266945194	1.2692	1.2692	0.343917	0.0607969	5.65682	1.54206e-08	3.56704e-07	FBXO2	26232	FBG1	ENSG00000116661
798	2200.79554748847	0.828686	1.20673	-0.271103	0.0479456	-5.6544	1.56395e-08	3.61315e-07	METTL4	64863	HsT661	ENSG00000101574
799	4641.21116330352	1.16496	1.16496	0.220277	0.0389754	5.65168	1.58886e-08	3.66612e-07	SERINC1	57515	TDE1L	ENSG00000111897
800	14832.026837656	1.26633	1.26633	0.340657	0.0602831	5.65095	1.59567e-08	3.67723e-07	TUBB4B	10383	Beta2	ENSG00000188229
801	3375.22364421396	1.15943	1.15943	0.213419	0.0377754	5.64969	1.60741e-08	3.69965e-07	VASP	7408	VASP	ENSG00000125753
802	61.4647199807846	0.46182	2.16535	-1.1146	0.197343	-5.64801	1.62314e-08	3.7312e-07	#N/A	#N/A	#N/A	ENSG00000258728
803	30.0176303543478	0.279114	3.58277	-1.84108	0.326113	-5.64551	1.64689e-08	3.78108e-07	ZGLP1	100125288	GATAD3	ENSG00000220201
804	418.83985317775	0.699698	1.42919	-0.515197	0.0912666	-5.64496	1.65215e-08	3.78844e-07	TSGA10	80705	CEP4L	ENSG00000135951
805	1951.03810381077	1.25486	1.25486	0.327528	0.0580322	5.64391	1.66236e-08	3.80711e-07	KATNB1	10300	KAT	ENSG00000140854
806	2367.98988723207	1.19468	1.19468	0.256627	0.0455021	5.6399	1.70144e-08	3.89178e-07	VAV2	7410	VAV-2	ENSG00000160293
807	855.796383081615	1.33525	1.33525	0.417109	0.0740363	5.63384	1.76241e-08	4.02625e-07	RABAC1	10567	PRA1	ENSG00000105404
808	3325.6360565938	1.20487	1.20487	0.268876	0.0477283	5.63348	1.76612e-08	4.02973e-07	MEST	4232	PEG1	ENSG00000106484
809	888.060562701604	1.27907	1.27907	0.355093	0.063075	5.6297	1.80526e-08	4.11394e-07	MAGEH1	28986	APR-1	ENSG00000187601
810	5054.5428550754	1.18732	1.18732	0.24771	0.0440051	5.62912	1.81127e-08	4.12253e-07	ZDHHC8	29801	DHHC8	ENSG00000099904
811	1721.31212518511	1.22489	1.22489	0.292652	0.0520124	5.62659	1.83812e-08	4.17848e-07	KDM4B	23030	JMJD2B	ENSG00000127663
812	1725.19841960583	0.779166	1.28342	-0.359998	0.0639967	-5.62526	1.8523e-08	4.20553e-07	AASS	10157	LKR/SDH	ENSG00000008311
813	4092.52133698773	1.17253	1.17253	0.229623	0.0408267	5.62432	1.86237e-08	4.22128e-07	SCAMP1	9522	SCAMP	ENSG00000085365
814	4391.92399905596	1.14287	1.14287	0.192664	0.0342566	5.62415	1.86428e-08	4.22128e-07	TMEM263	90488	C12orf23	ENSG00000151135
815	143.778652667138	0.597447	1.67379	-0.743118	0.132134	-5.62398	1.8661e-08	4.22128e-07	#N/A	#N/A	#N/A	ENSG00000279443
816	557.039862873174	0.692997	1.44301	-0.52908	0.0940938	-5.62289	1.87785e-08	4.24266e-07	PARAIL	101929709	RIPK2-DT	ENSG00000251136
817	837.781006618983	1.26067	1.26067	0.334191	0.0594658	5.61988	1.91085e-08	4.31193e-07	C15orf39	56905	C15orf39	ENSG00000167173
818	2235.84041498766	1.20599	1.20599	0.270214	0.0481328	5.61392	1.97796e-08	4.45791e-07	SDE2	163859	C1orf55	ENSG00000143751
819	6412.52339342654	1.23076	1.23076	0.299547	0.0533652	5.61316	1.9867e-08	4.47213e-07	GPX4	2879	GPx-4	ENSG00000167468
820	1766.12792112579	0.824637	1.21266	-0.27817	0.0495623	-5.61253	1.99395e-08	4.48298e-07	IKBKB	3551	IKK-2	ENSG00000104365
821	25.1060162383566	0.268147	3.72929	-1.8989	0.338421	-5.61106	2.01096e-08	4.51572e-07	GNRH2	2797	GnRH-II	ENSG00000125787
822	8231.86512973053	1.17644	1.17644	0.234431	0.0418032	5.60798	2.047e-08	4.59105e-07	ANP32A	8125	C15orf1	ENSG00000140350
823	4320.21890095601	1.20659	1.20659	0.27093	0.0483149	5.6076	2.05155e-08	4.59568e-07	PCCB	5096	PCCB	ENSG00000114054
824	464.555780497418	1.44195	1.44195	0.528021	0.0941995	5.60535	2.07837e-08	4.65011e-07	SPAG4	6676	CT127	ENSG00000061656
825	674.641605041518	0.683648	1.46274	-0.548674	0.0979142	-5.60362	2.09923e-08	4.69107e-07	LINC01963	150967	PKI55	ENSG00000260804
826	2090.93756003196	1.18561	1.18561	0.245629	0.0438502	5.60156	2.12436e-08	4.74149e-07	STK39	27347	DCHT	ENSG00000198648
827	2518.25848197999	1.1643	1.1643	0.219458	0.0391939	5.59929	2.15235e-08	4.79236e-07	CCDC186	55088	C10orf118	ENSG00000165813
828	154.654237604593	0.563067	1.77599	-0.828622	0.147984	-5.59941	2.15084e-08	4.79236e-07	LOC100289230	100289230	LOC100289230	ENSG00000248489
829	751.35596589458	0.761907	1.3125	-0.392314	0.0700788	-5.59818	2.16619e-08	4.81736e-07	MTHFD2L	441024	MTHFD2L	ENSG00000163738
830	9593.79760554159	1.23156	1.23156	0.300484	0.0536813	5.59755	2.17405e-08	4.829e-07	KRT7	3855	CK7	ENSG00000135480
831	2692.6211768181	0.79788	1.25332	-0.325757	0.0582069	-5.59653	2.18685e-08	4.85159e-07	HMBOX1	79618	HNF1LA	ENSG00000147421
832	5766.66059174722	0.873965	1.14421	-0.194353	0.0347294	-5.5962	2.19099e-08	4.85495e-07	PSME4	23198	PA200	ENSG00000068878
833	1551.92288563221	0.828247	1.20737	-0.271867	0.048588	-5.59535	2.20173e-08	4.87289e-07	PNKP	11284	AOA4	ENSG00000039650
834	2986.25990399058	1.19444	1.19444	0.256339	0.0458163	5.59493	2.20711e-08	4.87894e-07	PAWR	5074	PAR4	ENSG00000177425
835	1226.14371478296	1.33971	1.33971	0.421916	0.075429	5.59355	2.2247e-08	4.91192e-07	GADD45B	4616	GADD45BETA	ENSG00000099860
836	3062.37761003455	1.17955	1.17955	0.23824	0.0426269	5.58895	2.28446e-08	5.03783e-07	TIPARP	25976	ARTD14	ENSG00000163659
837	13197.3971781469	1.15992	1.15992	0.214029	0.0383027	5.58782	2.29942e-08	5.06478e-07	DAZAP2	9802	PRTB	ENSG00000183283
838	7845.02125766785	1.24652	1.24652	0.317905	0.0568953	5.58753	2.30317e-08	5.06697e-07	TUBB6	84617	FPVEPD	ENSG00000176014
839	3169.86018906053	0.857542	1.16612	-0.221721	0.0397028	-5.58452	2.3435e-08	5.1456e-07	SMG9	56006	C19orf61	ENSG00000105771
840	257.268017759882	0.621083	1.61009	-0.687142	0.123046	-5.58444	2.34452e-08	5.1456e-07	C3orf20	84077	C3orf20	ENSG00000131379
841	47.4540992055752	0.390493	2.56087	-1.35663	0.24294	-5.58424	2.34728e-08	5.1456e-07	#N/A	#N/A	#N/A	ENSG00000269807
842	111.182439889648	0.569019	1.75741	-0.813452	0.145709	-5.58273	2.36776e-08	5.18432e-07	TIMM23B-AGAP6	113218477	LINC00843	ENSG00000178440
843	2073.11238061358	0.821086	1.2179	-0.284394	0.0509529	-5.58151	2.38438e-08	5.21328e-07	KAT8	84148	LIGOWS	ENSG00000103510
844	837.524868472608	0.794935	1.25797	-0.331092	0.0593212	-5.58135	2.38664e-08	5.21328e-07	SPIRE2	84501	Spir-2	ENSG00000204991
845	659.747019009048	0.77189	1.29552	-0.373533	0.0669282	-5.5811	2.38997e-08	5.21437e-07	KMT5C	84787	SUV420H2	ENSG00000133247
846	108.570750760701	0.550961	1.81501	-0.859977	0.154162	-5.57839	2.42759e-08	5.2902e-07	#N/A	#N/A	#N/A	ENSG00000227388
847	473.376944032244	1.3384	1.3384	0.420508	0.0754132	5.57605	2.46035e-08	5.35527e-07	NPR3	4883	ANP-C	ENSG00000113389
848	1882.31797993599	1.19068	1.19068	0.251789	0.0451928	5.57145	2.52633e-08	5.4924e-07	MAPK7	5598	BMK1	ENSG00000166484
849	4086.20520140708	1.17021	1.17021	0.226762	0.0407117	5.56995	2.54817e-08	5.53333e-07	LRP5	4041	BMND1	ENSG00000162337
850	5875.3660563151	1.19756	1.19756	0.260099	0.0467074	5.56868	2.5667e-08	5.56702e-07	RAD23A	5886	HHR23A	ENSG00000179262
851	3152.86006198416	1.21774	1.21774	0.284201	0.0510491	5.56722	2.58841e-08	5.60751e-07	ATRAID	51374	APR--3	ENSG00000138085
852	2253.37926292487	1.23238	1.23238	0.301451	0.054151	5.56685	2.59387e-08	5.61276e-07	BASP1	10409	CAP-23	ENSG00000176788
853	840.368289539361	0.777134	1.28678	-0.363764	0.0654106	-5.56124	2.67865e-08	5.78941e-07	FCSK	197258	1110046B12Rik	ENSG00000157353
854	20.0532754385482	0.224774	4.44891	-2.15345	0.387444	-5.55809	2.72741e-08	5.88789e-07	#N/A	#N/A	#N/A	ENSG00000256955
855	100.662268635127	0.526095	1.9008	-0.926605	0.166748	-5.55691	2.74588e-08	5.92083e-07	SRRM5	100170229	ZNF576	ENSG00000226763
856	101.285977477464	0.45281	2.20843	-1.14302	0.205806	-5.55387	2.79416e-08	6.01788e-07	CRYGS	1427	CRYG8	ENSG00000213139
857	630.883736725999	1.36274	1.36274	0.446514	0.0804168	5.55249	2.81622e-08	6.05832e-07	COQ5	84274	COQ10D9	ENSG00000110871
858	1837.33704856088	1.23624	1.23624	0.305963	0.0551106	5.55181	2.82733e-08	6.07514e-07	ITGA6	3655	CD49f	ENSG00000091409
859	5278.75890180453	1.21866	1.21866	0.285301	0.0514135	5.54915	2.87055e-08	6.15691e-07	SLC39A7	7922	AGM9	ENSG00000112473
860	5002.05434707808	0.881651	1.13424	-0.181721	0.0327481	-5.54906	2.87207e-08	6.15691e-07	SMC6	79677	SMC-6	ENSG00000163029
861	4563.46676667354	1.14722	1.14722	0.198139	0.0357295	5.54554	2.93056e-08	6.275e-07	ATP8B2	57198	ATPID	ENSG00000143515
862	1160.14418824255	0.807724	1.23805	-0.308066	0.0555846	-5.54229	2.98543e-08	6.38509e-07	PASK	23178	PASKIN	ENSG00000115687
863	5707.43071469666	0.86894	1.15083	-0.202672	0.0365808	-5.5404	3.01777e-08	6.44676e-07	NEMF	9147	IDDSAPN	ENSG00000165525
864	5612.90756913043	1.16775	1.16775	0.223732	0.0404001	5.53791	3.06108e-08	6.53173e-07	RNF26	79102	RNF26	ENSG00000173456
865	1058.24189566245	1.30079	1.30079	0.379383	0.0685178	5.53699	3.07712e-08	6.55835e-07	SSBP3	23648	CSDP	ENSG00000157216
866	1085.4863192951	1.25852	1.25852	0.331729	0.060003	5.52854	3.22907e-08	6.87428e-07	RNF181	51255	HSPC238	ENSG00000168894
867	204.251524029522	0.644014	1.55276	-0.634835	0.114857	-5.52716	3.2546e-08	6.92063e-07	KRT8P12	90133	KRT8L2	ENSG00000229320
868	533.896871442872	1.31669	1.31669	0.396912	0.071875	5.52226	3.34673e-08	7.10832e-07	ADPRHL1	113622	ARH2	ENSG00000153531
869	3449.34689821776	1.2158	1.2158	0.281906	0.0510632	5.52073	3.37587e-08	7.14554e-07	CUL7	9820	3M1	ENSG00000044090
870	2031.61283102029	0.77699	1.28702	-0.364031	0.0659374	-5.52086	3.37337e-08	7.14554e-07	ZNF621	285268	ZNF621	ENSG00000172888
871	330.232559511562	0.724251	1.38074	-0.465438	0.084302	-5.52108	3.36927e-08	7.14554e-07	RBM11	54033	RBM11	ENSG00000185272
872	1726.68346129825	0.731344	1.36735	-0.451378	0.081797	-5.51828	3.42335e-08	7.23771e-07	C1QTNF6	114904	CTFP6	ENSG00000133466
873	1486.92668392268	1.28444	1.28444	0.361137	0.065451	5.51766	3.43536e-08	7.2548e-07	SIL1	64374	BAP	ENSG00000120725
874	1781.8649984533	0.819416	1.22038	-0.287331	0.0520801	-5.51711	3.4462e-08	7.26935e-07	CMTR2	55783	AFT	ENSG00000180917
875	399.7295330281	0.726816	1.37586	-0.460337	0.0834436	-5.51675	3.45328e-08	7.27596e-07	KCNJ14	3770	IRK4	ENSG00000182324
876	1927.7627450747	0.844471	1.18417	-0.24388	0.0442123	-5.51612	3.4656e-08	7.29359e-07	FAM13B	51306	ARHGAP49	ENSG00000031003
877	5795.44130772991	1.18207	1.18207	0.241316	0.0437495	5.51586	3.47072e-08	7.29602e-07	NECTIN1	5818	CD111	ENSG00000110400
878	1254.06800136022	0.796164	1.25602	-0.328862	0.0596421	-5.51393	3.50917e-08	7.36007e-07	PPIH	10465	CYP-20	ENSG00000171960
879	195.445435018192	0.629191	1.58934	-0.668429	0.121225	-5.51394	3.50884e-08	7.36007e-07	DPY19L2P2	349152	DPY19L2P2	ENSG00000291139
880	771.221438253785	1.29142	1.29142	0.368955	0.0669622	5.5099	3.59043e-08	7.5134e-07	B4GALT7	11285	EDSP1	ENSG00000027847
881	565.300703052104	0.767291	1.30329	-0.382155	0.0693558	-5.51006	3.58704e-08	7.5134e-07	EP400P1	347918	EP400NL	ENSG00000291171
882	8147.90134479023	0.836304	1.19574	-0.257901	0.0468275	-5.50746	3.6404e-08	7.60935e-07	SLC25A37	51312	HT015	ENSG00000147454
883	1169.50134278301	0.738221	1.35461	-0.437876	0.0795448	-5.50477	3.69645e-08	7.71776e-07	ANXA2R-AS1	153684	ANXA2R-AS1	ENSG00000215068
884	151.54907977361	1.77861	1.77861	0.830754	0.150964	5.50299	3.73403e-08	7.78739e-07	IGLON5	402665	IGLON5	ENSG00000142549
885	182.353152937512	0.618237	1.6175	-0.693767	0.126122	-5.50077	3.78129e-08	7.87704e-07	SNORC	389084	ASCL830	ENSG00000182600
886	2459.96261654451	1.35512	1.35512	0.438423	0.0797088	5.50031	3.79117e-08	7.88871e-07	DKK1	22943	DKK-1	ENSG00000107984
887	2694.5924904125	1.27508	1.27508	0.350593	0.0637428	5.50011	3.79548e-08	7.88877e-07	EFEMP1	2202	DHRD	ENSG00000115380
888	1110.53750572161	0.818695	1.22146	-0.288601	0.0524815	-5.4991	3.81727e-08	7.92514e-07	DTWD1	56986	MDS009	ENSG00000104047
889	8138.55902891669	1.16628	1.16628	0.221912	0.0403623	5.49801	3.84097e-08	7.96536e-07	AXL	558	ARK	ENSG00000167601
890	595.716393592093	0.763	1.31062	-0.390246	0.0710301	-5.49409	3.92739e-08	8.1263e-07	MFSD11	79157	ET	ENSG00000092931
891	376.861305610219	1.37066	1.37066	0.454874	0.0827908	5.49426	3.92355e-08	8.1263e-07	PLEKHA2	59339	TAPP2	ENSG00000169499
892	867.872673547872	0.771882	1.29554	-0.373548	0.0680175	-5.49195	3.97522e-08	8.21606e-07	PLEKHH1	57475	PLEKHH1	ENSG00000054690
893	987.261350664646	1.304	1.304	0.382946	0.0697346	5.49148	3.98574e-08	8.22856e-07	#N/A	#N/A	#N/A	ENSG00000269968
894	1548.86566315382	1.37891	1.37891	0.463525	0.0844163	5.49093	3.99814e-08	8.24493e-07	MRPL17	63875	L17mt	ENSG00000158042
895	212.015492512461	1.61707	1.61707	0.693386	0.126408	5.48531	4.12756e-08	8.50231e-07	PTH1R	5745	EKNS	ENSG00000160801
896	597.660958635566	0.758429	1.31852	-0.398915	0.0727971	-5.47981	4.25773e-08	8.76065e-07	RHOD	29984	ARHD	ENSG00000173156
897	884.510351590691	1.2798	1.2798	0.355922	0.0649574	5.47931	4.26978e-08	8.77565e-07	BICC1	80114	BICC	ENSG00000122870
898	230.83462038084	0.684099	1.46178	-0.547723	0.0999982	-5.47733	4.31783e-08	8.86454e-07	MYLK-AS1	100506826	MYLK-AS1	ENSG00000239523
899	1631.43098352568	0.816017	1.22546	-0.293329	0.0535557	-5.47707	4.32417e-08	8.86766e-07	EDRF1	26098	C10orf137	ENSG00000107938
900	5435.40670845702	1.23478	1.23478	0.304256	0.0555847	5.47373	4.40649e-08	9.02645e-07	ALDH1B1	219	ALDH5	ENSG00000137124
901	2494.4881313968	1.19066	1.19066	0.251767	0.046002	5.47296	4.42581e-08	9.04592e-07	IRS2	8660	IRS-2	ENSG00000185950
902	296.98273555062	0.63585	1.5727	-0.653241	0.119357	-5.47302	4.42439e-08	9.04592e-07	#N/A	#N/A	#N/A	ENSG00000271335
903	230.866121245392	0.573529	1.74359	-0.802062	0.146624	-5.47019	4.49556e-08	9.1783e-07	RASD1	51655	AGS1	ENSG00000108551
904	441.679209247989	0.721549	1.38591	-0.470831	0.0861136	-5.46755	4.56287e-08	9.30543e-07	SRP14-DT	100131089	SRP14-AS1	ENSG00000248508
905	1235.11007573022	1.23665	1.23665	0.306436	0.0560493	5.46726	4.57058e-08	9.31086e-07	MBTPS2	51360	BRESEK	ENSG00000012174
906	548.118043866069	0.758677	1.31808	-0.398441	0.072931	-5.46326	4.67458e-08	9.51221e-07	FAM200C	63920	Buster3	ENSG00000221886
907	14849.8476474939	1.31961	1.31961	0.400107	0.0732492	5.46227	4.70082e-08	9.55506e-07	TUBB	203068	CDCBM6	ENSG00000196230
908	6361.82816418776	1.1873	1.1873	0.247686	0.0453698	5.45925	4.78137e-08	9.70807e-07	SEC13	6396	D3S1231E	ENSG00000157020
909	182.226511686364	0.590412	1.69373	-0.760206	0.139276	-5.45827	4.80796e-08	9.75133e-07	NUDT16-DT	339874	NUDT16-DT	ENSG00000250608
910	164.822437240785	0.592469	1.68785	-0.755187	0.138377	-5.45745	4.83018e-08	9.78563e-07	LOC102724560	102724560	CBS	ENSG00000274276
911	1840.96751226364	0.807668	1.23813	-0.308165	0.0564767	-5.4565	4.85608e-08	9.8273e-07	ZNF346	23567	JAZ	ENSG00000113761
912	1031.76555212473	1.23326	1.23326	0.30248	0.05548	5.45205	4.97932e-08	1.00656e-06	MYORG	57462	IBGC7	ENSG00000164976
913	57521.9105003073	1.20637	1.20637	0.270673	0.0496784	5.4485	5.07954e-08	1.0257e-06	RPL13A	23521	L13A	ENSG00000142541
914	825.658928876718	1.26047	1.26047	0.333962	0.0613046	5.44758	5.10592e-08	1.0299e-06	SMYD3	64754	KMT3E	ENSG00000185420
915	121.416777829036	0.520041	1.92293	-0.943303	0.173317	-5.44266	5.24922e-08	1.05765e-06	MYH15	22989	MYH15	ENSG00000144821
916	579.008188718393	0.735779	1.3591	-0.442656	0.0813402	-5.44203	5.26766e-08	1.0602e-06	LYSMD4	145748	LYSMD4	ENSG00000183060
917	59.4732331670464	0.45439	2.20075	-1.138	0.209142	-5.44127	5.29009e-08	1.06356e-06	#N/A	#N/A	#N/A	ENSG00000268533
918	785.217949410827	0.737079	1.35671	-0.440109	0.0808943	-5.44055	5.31163e-08	1.06672e-06	CAPRIN2	65981	C1QDC1	ENSG00000110888
919	536.745910695027	0.723814	1.38157	-0.466308	0.0857369	-5.43883	5.36318e-08	1.0759e-06	LINC01128	643837	LINC01128	ENSG00000228794
920	114.780994221222	0.543315	1.84055	-0.88014	0.161874	-5.43721	5.41218e-08	1.08455e-06	#N/A	#N/A	#N/A	ENSG00000261094
921	5477.70698362576	0.713521	1.4015	-0.486973	0.0896638	-5.4311	5.60092e-08	1.12116e-06	OLMALINC	90271	C10orf75	ENSG00000235823
922	10495.7968466098	1.14322	1.14322	0.193097	0.0355601	5.43016	5.63048e-08	1.12585e-06	TRAP1	10131	HSP 75	ENSG00000126602
923	101.475097476367	0.540331	1.85072	-0.888084	0.163565	-5.42956	5.6494e-08	1.12841e-06	IQCH-AS1	100506686	IQCH-AS1	ENSG00000259673
924	661.926797101762	1.34016	1.34016	0.422403	0.077815	5.4283	5.68927e-08	1.13514e-06	EFHD1	80303	MST133	ENSG00000115468
925	29.2259048351587	0.301272	3.31926	-1.73086	0.318989	-5.42609	5.76022e-08	1.14806e-06	#N/A	#N/A	#N/A	ENSG00000228629
926	39753.5860301619	0.783662	1.27606	-0.351696	0.0648431	-5.4238	5.83464e-08	1.16158e-06	GRAMD1B	57476	LINC01059	ENSG00000023171
927	2922.09960522514	0.830008	1.20481	-0.268804	0.0495617	-5.42361	5.84066e-08	1.16158e-06	BMP1	649	OI13	ENSG00000168487
928	99.0228842429856	0.541352	1.84723	-0.885361	0.163316	-5.42115	5.92175e-08	1.17644e-06	CCT6P3	643180	CCT6-3P	ENSG00000290860
929	614.892325411041	1.28786	1.28786	0.364973	0.0674001	5.41503	6.12796e-08	1.21609e-06	PCSK1N	27344	BigLEN	ENSG00000102109
930	392.718194691018	0.719167	1.3905	-0.475601	0.0878411	-5.41434	6.15162e-08	1.21948e-06	#N/A	#N/A	#N/A	ENSG00000266302
931	4105.76964619814	1.24089	1.24089	0.31138	0.0575446	5.41111	6.26363e-08	1.24005e-06	SH2D4A	63898	PPP1R38	ENSG00000104611
932	680.305661159766	0.779284	1.28323	-0.359779	0.0664907	-5.41096	6.26886e-08	1.24005e-06	SLC38A6	145389	NAT-1	ENSG00000139974
933	1234.96740137321	1.2192	1.2192	0.28593	0.0528476	5.41047	6.28593e-08	1.24209e-06	LAMC3	10319	OCCM	ENSG00000050555
934	6234.70730952235	1.17626	1.17626	0.234213	0.0432958	5.4096	6.3164e-08	1.24678e-06	SEC62	7095	Dtrp1	ENSG00000008952
935	1395.96158242121	0.814839	1.22724	-0.295412	0.0546241	-5.4081	6.36984e-08	1.25598e-06	PTPDC1	138639	PTP9Q22	ENSG00000158079
936	3806.01204017334	1.18123	1.18123	0.240285	0.0444406	5.40689	6.41297e-08	1.26313e-06	PDLIM1	9124	CLIM1	ENSG00000107438
937	599.384258179738	0.74249	1.34682	-0.429556	0.0795606	-5.39911	6.69724e-08	1.31772e-06	MTRF1	9617	MRF1	ENSG00000120662
938	616.129488900729	0.762836	1.3109	-0.390555	0.0723404	-5.39886	6.70666e-08	1.31817e-06	TRAPPC2	6399	MIP2A	ENSG00000196459
939	113.37757851197	0.536157	1.86512	-0.899271	0.166589	-5.39815	6.73299e-08	1.32193e-06	#N/A	#N/A	#N/A	ENSG00000222017
940	1038.72084837642	0.799218	1.25122	-0.323339	0.0599034	-5.39766	6.75148e-08	1.32415e-06	#N/A	#N/A	#N/A	ENSG00000290931
941	3904.10781423259	1.17104	1.17104	0.227792	0.0422104	5.39659	6.79184e-08	1.33065e-06	MVD	4597	FP17780	ENSG00000167508
942	3382.5981822488	1.15078	1.15078	0.202612	0.0375513	5.3956	6.82965e-08	1.33664e-06	TARS2	80222	COXPD21	ENSG00000143374
943	1409.72305638244	0.8156	1.22609	-0.294066	0.054516	-5.39413	6.88559e-08	1.34616e-06	NMRK1	54981	C9orf95	ENSG00000106733
944	3166.75059037774	0.853264	1.17197	-0.228936	0.04245	-5.39308	6.92599e-08	1.35119e-06	SUPT7L	9913	SPT7L	ENSG00000119760
945	2257.66506968755	1.20355	1.20355	0.267299	0.0495619	5.39324	6.9197e-08	1.35119e-06	NFYB	4801	CBF-A	ENSG00000120837
946	344.099616611378	1.4024	1.4024	0.487896	0.0904953	5.39139	6.99131e-08	1.36249e-06	PAQR5	54852	MPRG	ENSG00000137819
947	1959.66627225245	1.2717	1.2717	0.346757	0.0643539	5.38829	7.113e-08	1.38474e-06	NDUFAF3	25915	2P1	ENSG00000178057
948	6934.660263852	1.22408	1.22408	0.291702	0.0541697	5.38497	7.24579e-08	1.40911e-06	TIMP2	7077	CSC-21K	ENSG00000035862
949	520.117101786344	0.751139	1.33131	-0.412848	0.0766971	-5.38284	7.33202e-08	1.42438e-06	#N/A	#N/A	#N/A	ENSG00000279207
950	1346.99813433869	1.21457	1.21457	0.280441	0.0521059	5.38213	7.36089e-08	1.42848e-06	ISYNA1	51477	INO1	ENSG00000105655
951	3967.84390353188	1.15789	1.15789	0.211495	0.0393312	5.37727	7.56227e-08	1.46601e-06	CDK9	1025	C-2k	ENSG00000136807
952	2070.52876992399	0.834022	1.19901	-0.261843	0.0486999	-5.37667	7.5876e-08	1.46938e-06	CENPT	80152	C16orf56	ENSG00000102901
953	1263.14619009688	1.24923	1.24923	0.321038	0.05972	5.37572	7.62766e-08	1.47559e-06	ZNF777	27153	ZNF777	ENSG00000196453
954	11065.5265351399	1.15714	1.15714	0.210567	0.0391822	5.37404	7.69915e-08	1.48786e-06	EIF3H	8667	EIF3S3	ENSG00000147677
955	4953.05672027313	0.726688	1.37611	-0.460591	0.0858144	-5.3673	7.9926e-08	1.54295e-06	LONRF2	164832	RNF192	ENSG00000170500
956	5127.20361794275	0.880011	1.13635	-0.184407	0.0343633	-5.36641	8.03202e-08	1.54732e-06	DIDO1	11083	BYE1	ENSG00000101191
957	2707.71483354018	1.21878	1.21878	0.285437	0.0531881	5.36655	8.02559e-08	1.54732e-06	CHPF	79586	CHPF1	ENSG00000123989
958	3145.01832625517	0.854567	1.17018	-0.226734	0.0422633	-5.36481	8.10332e-08	1.55942e-06	TRIM41	90933	RINCK	ENSG00000146063
959	5234.12521147717	0.8825	1.13314	-0.180332	0.0336427	-5.36021	8.31233e-08	1.59798e-06	SETD7	80854	KMT7	ENSG00000145391
960	47.1213097048249	2.54935	2.54935	1.35013	0.252156	5.35434	8.58692e-08	1.64905e-06	LINGO1	84894	LERN1	ENSG00000169783
961	15859.502932537	1.12809	1.12809	0.173878	0.0324764	5.35398	8.60423e-08	1.65065e-06	COPB2	9276	MCPH19	ENSG00000184432
962	6591.1052110013	1.24624	1.24624	0.317582	0.0593241	5.35335	8.63413e-08	1.65467e-06	YIF1A	10897	54TM	ENSG00000174851
963	6542.10925068377	0.854643	1.17008	-0.226606	0.0423328	-5.35296	8.65275e-08	1.65651e-06	LPIN1	23175	PAP1	ENSG00000134324
964	7880.45112945081	1.14272	1.14272	0.192472	0.0359729	5.35046	8.77301e-08	1.67779e-06	DSG2	1829	CDHF5	ENSG00000046604
965	3446.93238018651	1.21113	1.21113	0.276359	0.0516962	5.34584	8.99992e-08	1.7194e-06	ATXN10	25814	ATX10	ENSG00000130638
966	20451.3098816084	1.1247	1.1247	0.169538	0.0317175	5.34526	9.02896e-08	1.72317e-06	ERBIN	55914	ERBB2IP	ENSG00000112851
967	4974.66282938418	0.848259	1.17889	-0.237424	0.0444194	-5.34505	9.0391e-08	1.72332e-06	CYREN	78996	C7orf49	ENSG00000122783
968	48.8886899173282	0.417708	2.39402	-1.25943	0.235641	-5.34471	9.05607e-08	1.72477e-06	CDH26	60437	VR20	ENSG00000124215
969	4859.63927622891	1.18705	1.18705	0.247385	0.0463117	5.34173	9.20616e-08	1.75155e-06	SC5D	6309	ERG3	ENSG00000109929
970	78946.7351209534	1.14592	1.14592	0.196504	0.0368753	5.32888	9.88222e-08	1.87823e-06	SCD	6319	FADS5	ENSG00000099194
971	5263.26796880744	1.1338	1.1338	0.181164	0.0340073	5.3272	9.97356e-08	1.89364e-06	PAK4	10298	PAK4	ENSG00000130669
972	236.253594389504	1.51616	1.51616	0.600418	0.112719	5.32668	1.00023e-07	1.89715e-06	DPYSL4	10570	CRMP3	ENSG00000151640
973	3892.63223980056	1.13534	1.13534	0.183125	0.0343827	5.32607	1.00358e-07	1.90154e-06	RNF11	26994	CGI-123	ENSG00000123091
974	135.151079711314	0.554234	1.80429	-0.851433	0.160016	-5.32093	1.0324e-07	1.95414e-06	ZNF606-AS1	100128398	ZNF606-AS1	ENSG00000176593
975	41557.9127402927	1.21073	1.21073	0.275875	0.0518539	5.32024	1.03628e-07	1.95947e-06	TPT1	7178	HRF	ENSG00000133112
976	743.207247548603	1.31993	1.31993	0.400457	0.0753628	5.31373	1.07403e-07	2.02877e-06	IL32	9235	IL-32alpha	ENSG00000008517
977	77.3782376180419	0.497489	2.01009	-1.00726	0.189597	-5.31266	1.08036e-07	2.03864e-06	FTCD	10841	LCHC1	ENSG00000160282
978	23.6031821458388	0.248203	4.02896	-2.01041	0.378588	-5.31027	1.09462e-07	2.06343e-06	CLEC18B	497190	MRCL2	ENSG00000140839
979	97.1282047292422	0.541345	1.84725	-0.885379	0.166774	-5.30885	1.10321e-07	2.07751e-06	#N/A	#N/A	#N/A	ENSG00000289405
980	88.8351252071084	0.427504	2.33916	-1.22599	0.230945	-5.30859	1.10474e-07	2.07827e-06	#N/A	#N/A	#N/A	ENSG00000267786
981	6106.56676599532	0.862112	1.15994	-0.214054	0.0403358	-5.30679	1.11575e-07	2.0947e-06	SMG1	23049	61E3.4	ENSG00000157106
982	28520.860616224	1.15385	1.15385	0.206455	0.0389035	5.30684	1.11543e-07	2.0947e-06	BSG	682	5F7	ENSG00000172270
983	3156.22561719511	1.16086	1.16086	0.215196	0.040562	5.30535	1.12456e-07	2.1091e-06	HPCAL1	3241	BDR1	ENSG00000115756
984	4438.22088439695	1.16801	1.16801	0.224048	0.042238	5.30442	1.13029e-07	2.11769e-06	EFCAB14	9813	KIAA0494	ENSG00000159658
985	6719.04906282776	0.838989	1.19191	-0.253277	0.0477576	-5.30338	1.1368e-07	2.12772e-06	TUG1	55000	LINC00080	ENSG00000253352
986	117.093441581748	0.552946	1.8085	-0.85479	0.161288	-5.29977	1.15947e-07	2.16794e-06	#N/A	#N/A	#N/A	ENSG00000268434
987	2398.39521419339	1.18674	1.18674	0.246999	0.0466107	5.2992	1.1631e-07	2.17253e-06	SEPTIN6	23157	SEP2	ENSG00000125354
988	1674.72034745857	1.18277	1.18277	0.242166	0.0457009	5.29893	1.16485e-07	2.1736e-06	CUEDC2	79004	C10orf66	ENSG00000107874
989	13399.0646340334	1.11436	1.11436	0.156221	0.0294881	5.29776	1.1723e-07	2.18529e-06	CCND1	595	BCL1	ENSG00000110092
990	1632.30659547215	1.19104	1.19104	0.252217	0.0476168	5.29682	1.17838e-07	2.19441e-06	MOSPD3	64598	CDS3	ENSG00000106330
991	2746.31340177796	1.17511	1.17511	0.232791	0.0440084	5.28971	1.22513e-07	2.27917e-06	PIH1D1	55011	DNAAF14	ENSG00000104872
992	5987.47402510899	1.14807	1.14807	0.199215	0.0376629	5.28943	1.22696e-07	2.28027e-06	GLUL	2752	GLNS	ENSG00000135821
993	3532.94388069764	0.807791	1.23794	-0.307947	0.058249	-5.28673	1.24523e-07	2.3119e-06	UTP20	27340	1A6/DRIM	ENSG00000120800
994	854.72712249645	0.801921	1.24701	-0.318468	0.0602987	-5.2815	1.2813e-07	2.37646e-06	MATCAP1	653319	KIAA0895L	ENSG00000196123
995	361.471187818986	0.718837	1.39114	-0.476262	0.0901888	-5.28073	1.28673e-07	2.38414e-06	HEXD	284004	HEXDC	ENSG00000169660
996	1543.82272351189	0.802965	1.24538	-0.316592	0.0599601	-5.28004	1.29159e-07	2.39073e-06	MTHFR	4524	MTHFR	ENSG00000177000
997	849.913124518557	1.45892	1.45892	0.544898	0.103204	5.27983	1.29302e-07	2.39098e-06	SERPING1	710	C1IN	ENSG00000149131
998	1112.84960852439	0.773814	1.2923	-0.369941	0.0700962	-5.27762	1.30873e-07	2.4176e-06	SLC25A45	283130	SLC25A45	ENSG00000162241
999	6014.33968725642	1.13181	1.13181	0.178633	0.0338855	5.27168	1.35181e-07	2.49469e-06	FLOT2	2319	ECS-1	ENSG00000132589
1000	16095.8180567793	1.18448	1.18448	0.244253	0.0463705	5.26743	1.3835e-07	2.55062e-06	PRDX5	25824	ACR1	ENSG00000126432
1001	5062.98252115287	1.14496	1.14496	0.195299	0.0371131	5.26227	1.4229e-07	2.62064e-06	TBC1D9B	23061	GRAMD9B	ENSG00000197226
1002	16224.818668133	0.897245	1.11452	-0.156425	0.0297326	-5.26107	1.43217e-07	2.63507e-06	SON	6651	BASS1	ENSG00000159140
1003	3166.51385141553	1.16066	1.16066	0.214943	0.0408618	5.26025	1.4386e-07	2.64427e-06	DPP7	29952	DPP2	ENSG00000176978
1004	2675.21156092789	1.18775	1.18775	0.248237	0.047198	5.25949	1.44457e-07	2.65259e-06	PFKFB3	5209	IPFK2	ENSG00000170525
1005	195.928179112684	0.6286	1.59084	-0.669786	0.127396	-5.25751	1.46021e-07	2.67866e-06	SDHAP1	255812	SDHAL1	ENSG00000290763
1006	2505.13106315585	0.786175	1.27198	-0.347078	0.0660313	-5.25626	1.47016e-07	2.69422e-06	MEGF9	1955	EGFL5	ENSG00000106780
1007	935.976478632196	0.786903	1.27081	-0.345743	0.065807	-5.2539	1.48916e-07	2.72633e-06	SNHG17	388796	SNHG17	ENSG00000196756
1008	547.9183962532	0.778753	1.2841	-0.360762	0.0687247	-5.24937	1.52617e-07	2.79132e-06	ZNF354B	117608	KID2	ENSG00000178338
1009	5136.93700699867	0.870977	1.14814	-0.199294	0.0379827	-5.24696	1.54626e-07	2.82527e-06	ABHD2	11057	HS1-2	ENSG00000140526
1010	4074.32592568907	0.874321	1.14374	-0.193764	0.0369377	-5.24571	1.55681e-07	2.84172e-06	TNRC6A	27327	CAGH26	ENSG00000090905
1011	1296.7665476928	1.22041	1.22041	0.287362	0.054803	5.24354	1.57528e-07	2.86975e-06	CYBRD1	79901	CYB561A2	ENSG00000071967
1012	7067.50015197684	1.19002	1.19002	0.250987	0.0478643	5.24372	1.57374e-07	2.86975e-06	CBX5	23468	HEL25	ENSG00000094916
1013	44.518941666885	0.359328	2.78298	-1.47663	0.281766	-5.24062	1.60042e-07	2.9098e-06	CGA	1081	CG-ALPHA	ENSG00000135346
1014	727.58501066492	1.27197	1.27197	0.347062	0.0662233	5.24079	1.59894e-07	2.9098e-06	SHANK2	22941	AUTS17	ENSG00000162105
1015	1987.62650697824	1.22474	1.22474	0.292481	0.05582	5.23972	1.60823e-07	2.92111e-06	LRRC3	81543	C21orf102	ENSG00000160233
1016	1609.10141001112	1.20217	1.20217	0.265643	0.0507221	5.23722	1.63013e-07	2.95798e-06	ORAI2	80228	C7orf19	ENSG00000160991
1017	2766.26615644133	1.19667	1.19667	0.25902	0.049507	5.23198	1.67705e-07	3.04013e-06	PODXL	5420	Gp200	ENSG00000128567
1018	1484.33216941916	1.29675	1.29675	0.374905	0.0716635	5.23146	1.68173e-07	3.04562e-06	CTHRC1	115908	CTHRC1	ENSG00000164932
1019	826.589373717464	0.763526	1.30971	-0.389251	0.074438	-5.2292	1.70245e-07	3.08012e-06	CEP135	9662	CEP4	ENSG00000174799
1020	2446.51673214637	0.831347	1.20287	-0.266478	0.0509731	-5.22781	1.71525e-07	3.10023e-06	KNTC1	9735	ROD	ENSG00000184445
1021	55571.5818517516	1.15045	1.15045	0.202198	0.0386889	5.22624	1.72991e-07	3.12366e-06	RPL4	6124	L4	ENSG00000174444
1022	3987.2181176485	0.813747	1.22888	-0.297347	0.0569207	-5.22388	1.75211e-07	3.16066e-06	RRP12	23223	KIAA0690	ENSG00000052749
1023	441.392536328317	0.739609	1.35207	-0.435166	0.0833071	-5.22363	1.75447e-07	3.16181e-06	CCDC191	57577	KIAA1407	ENSG00000163617
1024	5259.23709584183	0.883229	1.13221	-0.17914	0.0343189	-5.21986	1.7906e-07	3.22378e-06	PARP4	143	ADPRTL1	ENSG00000102699
1025	2055.61676647967	1.1744	1.1744	0.231923	0.0444382	5.219	1.79892e-07	3.23268e-06	SPAG7	9552	ACRP	ENSG00000091640
1026	47.6057782894408	0.400749	2.49533	-1.31923	0.252775	-5.21899	1.79905e-07	3.23268e-06	#N/A	#N/A	#N/A	ENSG00000268400
1027	8868.2100643715	1.11665	1.11665	0.159172	0.0305184	5.2156	1.83225e-07	3.28914e-06	PICALM	8301	CALM	ENSG00000073921
1028	282.717379074456	0.693276	1.44243	-0.528498	0.101369	-5.21363	1.85179e-07	3.32097e-06	#N/A	#N/A	#N/A	ENSG00000236924
1029	823.053617883234	0.799935	1.2501	-0.322045	0.061777	-5.21302	1.85788e-07	3.32542e-06	CA13	377677	CAXIII	ENSG00000185015
1030	201.029420628126	0.642293	1.55692	-0.638697	0.122516	-5.21316	1.85646e-07	3.32542e-06	#N/A	#N/A	#N/A	ENSG00000289421
1031	1122.9680166027	1.29489	1.29489	0.372828	0.071525	5.21256	1.86255e-07	3.33055e-06	FAAP100	80233	C17orf70	ENSG00000185504
1032	926.731242881106	0.801124	1.24825	-0.319903	0.0614216	-5.20832	1.90556e-07	3.40416e-06	SELENOO	83642	SELO	ENSG00000073169
1033	2098.83754163277	1.16623	1.16623	0.221855	0.0426077	5.20693	1.91988e-07	3.42642e-06	MACROH2A2	55506	H2AFY2	ENSG00000099284
1034	1897.36533212568	1.18957	1.18957	0.250434	0.0480993	5.20661	1.92326e-07	3.42914e-06	NCKIPSD	51517	AF3P21	ENSG00000213672
1035	2551.90190025761	0.841643	1.18815	-0.24872	0.0477723	-5.20638	1.92563e-07	3.43003e-06	DMAC2L	27109	ATP5S	ENSG00000125375
1036	16912.7605561572	0.879658	1.13681	-0.184985	0.0355425	-5.20461	1.94404e-07	3.4595e-06	PRKDC	5591	DNA-PKC	ENSG00000253729
1037	907.537130577848	0.774858	1.29056	-0.367997	0.0707369	-5.20233	1.96807e-07	3.49888e-06	NBPF8	728841	NBPF8P	ENSG00000270231
1038	2916.8335757794	0.842716	1.18664	-0.246882	0.0474654	-5.2013	1.97895e-07	3.51145e-06	WASHC2A	387680	FAM21A	ENSG00000099290
1039	665.932235359209	0.789072	1.26731	-0.34177	0.0657072	-5.20141	1.97778e-07	3.51145e-06	ZBTB48	3104	HKR3	ENSG00000204859
1040	24.966401215812	0.278842	3.58626	-1.84248	0.35465	-5.19522	2.04483e-07	3.62485e-06	#N/A	#N/A	#N/A	ENSG00000287707
1041	3549.79454046613	1.18545	1.18545	0.245433	0.0472457	5.19482	2.04922e-07	3.62914e-06	PRUNE1	58497	DRES-17	ENSG00000143363
1042	1750.00236417563	1.19175	1.19175	0.253085	0.0487484	5.19165	2.08437e-07	3.68785e-06	ASB13	79754	ASB13	ENSG00000196372
1043	2796.7554070773	1.16104	1.16104	0.215416	0.0415153	5.18884	2.11603e-07	3.73669e-06	CERCAM	51148	CEECAM1	ENSG00000167123
1044	15522.3870458974	0.831652	1.20243	-0.265947	0.0512532	-5.1889	2.11542e-07	3.73669e-06	BCL9L	283149	B9L	ENSG00000186174
1045	84.0787793189808	0.52834	1.89272	-0.920462	0.177431	-5.18773	2.12875e-07	3.75557e-06	#N/A	#N/A	#N/A	ENSG00000270605
1046	1358.77646134435	1.24195	1.24195	0.312603	0.0602716	5.18658	2.14191e-07	3.77517e-06	KCTD17	79734	KCTD17	ENSG00000100379
1047	486.921760147818	0.726902	1.3757	-0.460167	0.0887301	-5.18615	2.14689e-07	3.78034e-06	#N/A	#N/A	#N/A	ENSG00000214826
1048	993.558187549141	0.742257	1.34724	-0.43001	0.0829521	-5.18383	2.17374e-07	3.82396e-06	CTC-338M12.4	101928649	CTC-338M12.4	ENSG00000233937
1049	4726.26975895783	0.869391	1.15023	-0.201923	0.0390063	-5.17668	2.25864e-07	3.96952e-06	SAFB2	9667	SAFB2	ENSG00000130254
1050	1411.60686339363	0.831349	1.20286	-0.266474	0.0515095	-5.17331	2.29989e-07	4.03817e-06	CASP9	842	APAF-3	ENSG00000132906
1051	10151.2507106818	1.14451	1.14451	0.194734	0.037646	5.17277	2.30645e-07	4.04584e-06	PAFAH1B2	5049	HEL-S-303	ENSG00000168092
1052	48.8532507189904	2.276	2.276	1.1865	0.229463	5.17078	2.33113e-07	4.08524e-06	MEGF11	84465	MEGF11	ENSG00000157890
1053	3653.99650766474	1.17026	1.17026	0.226829	0.0438732	5.17011	2.33953e-07	4.09606e-06	UGP2	7360	DEE83	ENSG00000169764
1054	1044.85081866634	0.819214	1.22068	-0.287687	0.0556546	-5.16914	2.35168e-07	4.11343e-06	GGT7	2686	D20S101	ENSG00000131067
1055	265.655941875787	0.690041	1.44919	-0.535246	0.103558	-5.16855	2.35922e-07	4.12271e-06	HSF4	3299	CTM	ENSG00000102878
1056	1037.57417422571	0.789684	1.26633	-0.340653	0.0659538	-5.16502	2.40416e-07	4.19727e-06	MIGA2	84895	C9orf54	ENSG00000148343
1057	151.640427481571	0.607066	1.64727	-0.720075	0.13951	-5.16147	2.45013e-07	4.27348e-06	SEC31B	25956	SEC31B-1	ENSG00000075826
1058	839.542212472567	0.782839	1.2774	-0.353212	0.0684377	-5.16107	2.45539e-07	4.27859e-06	ZNF780B	163131	ZNF779	ENSG00000128000
1059	26279.6409757865	1.16204	1.16204	0.216659	0.0419947	5.15921	2.47993e-07	4.31727e-06	CAVIN1	284119	CAVIN	ENSG00000177469
1060	295.672494490555	0.687397	1.45476	-0.540784	0.104825	-5.1589	2.48403e-07	4.32035e-06	MIRLET7BHG	400931	linc-Ppara	ENSG00000197182
1061	93.7159610092972	0.555594	1.79988	-0.847897	0.164465	-5.15549	2.52965e-07	4.39553e-06	TMOD4	29765	SK-TMOD	ENSG00000163157
1062	11225.7958562314	1.1476	1.1476	0.198623	0.0385327	5.15466	2.54098e-07	4.41106e-06	FKBP8	23770	FKBP38	ENSG00000105701
1063	2809.24131693256	1.18458	1.18458	0.24437	0.0474132	5.15404	2.54928e-07	4.42131e-06	PRPF31	26121	NY-BR-99	ENSG00000105618
1064	41.5675078343476	0.382156	2.61673	-1.38777	0.269452	-5.15033	2.60032e-07	4.50559e-06	#N/A	#N/A	#N/A	ENSG00000258365
1065	10.7734042240491	0.0530058	18.8659	-4.23771	0.822882	-5.14983	2.60717e-07	4.51322e-06	#N/A	#N/A	#N/A	ENSG00000269125
1066	955.828189371591	1.25765	1.25765	0.330731	0.0642262	5.14947	2.61229e-07	4.51784e-06	NFE2L3	9603	NRF3	ENSG00000050344
1067	813.643424246544	0.792166	1.26236	-0.336125	0.0652765	-5.14925	2.61533e-07	4.51886e-06	SASS6	163786	MCPH14	ENSG00000156876
1068	8409.89979482335	1.14184	1.14184	0.191367	0.0371658	5.14899	2.61886e-07	4.52073e-06	MLF2	8079	NTN4	ENSG00000089693
1069	2141.73994814293	0.84845	1.17862	-0.237098	0.0460773	-5.14566	2.66578e-07	4.59742e-06	ZDHHC6	64429	DHHC-6	ENSG00000023041
1070	14363.2264221765	1.12457	1.12457	0.169368	0.0329217	5.14456	2.68144e-07	4.61402e-06	MYL12A	10627	HEL-S-24	ENSG00000101608
1071	156.255211005669	0.646487	1.54682	-0.629308	0.122329	-5.1444	2.68371e-07	4.61402e-06	CYP27B1	1594	CP2B	ENSG00000111012
1072	83.553621088515	0.543599	1.83959	-0.879384	0.170929	-5.14473	2.67902e-07	4.61402e-06	AOC3	8639	HPAO	ENSG00000131471
1073	96.9468945492967	0.565959	1.76691	-0.82123	0.159639	-5.14428	2.68542e-07	4.61402e-06	PHC2-AS1	101929464	PHC2-AS1	ENSG00000233246
1074	2330.51327251329	1.1776	1.1776	0.235849	0.0458528	5.14362	2.695e-07	4.62187e-06	FEZ2	9637	HUM3CL	ENSG00000171055
1075	3606.53147745676	0.863077	1.15865	-0.212439	0.0413004	-5.14375	2.69309e-07	4.62187e-06	SETD2	29072	HBP231	ENSG00000181555
1076	2144.51411613137	0.824951	1.21219	-0.277619	0.0539907	-5.14197	2.71871e-07	4.6582e-06	AKAP8L	26993	HA95	ENSG00000011243
1077	558.91856511534	0.684599	1.46071	-0.546669	0.106392	-5.13827	2.77286e-07	4.74656e-06	ITGB1-DT	101929475	LincIN	ENSG00000229656
1078	4353.7920625971	1.14412	1.14412	0.194234	0.0378074	5.13746	2.78484e-07	4.76265e-06	CADM1	23705	BL2	ENSG00000182985
1079	12506.6425114206	1.12129	1.12129	0.165158	0.032162	5.1352	2.8184e-07	4.81558e-06	CNN2	1265	CNN2	ENSG00000064666
1080	237.480179864602	0.690272	1.4487	-0.534762	0.1042	-5.13206	2.8659e-07	4.8922e-06	#N/A	#N/A	#N/A	ENSG00000254929
1081	14998.9243311211	1.17281	1.17281	0.229966	0.044825	5.13031	2.8927e-07	4.93338e-06	FDFT1	2222	DGPT	ENSG00000079459
1082	825.255276427681	1.30163	1.30163	0.380317	0.0741689	5.12771	2.9329e-07	4.99731e-06	GSDME	1687	DFNA5	ENSG00000105928
1083	386.200567287876	0.743191	1.34555	-0.428195	0.0835201	-5.12686	2.9462e-07	5.01436e-06	PHF11	51131	APY	ENSG00000136147
1084	3198.56607444117	0.859937	1.16288	-0.217698	0.0424633	-5.12672	2.94834e-07	5.01436e-06	SLFN13	146857	SLFN10	ENSG00000154760
1085	22867.8371796259	1.2237	1.2237	0.291253	0.0568453	5.12361	2.99747e-07	5.09299e-06	RPL18A	6142	L18A	ENSG00000105640
1086	1031.91812116029	0.804703	1.24269	-0.313472	0.0611838	-5.12344	3.0001e-07	5.09299e-06	PEX6	5190	HMLR2	ENSG00000124587
1087	1922.06629574406	1.23633	1.23633	0.30606	0.0597537	5.12202	3.02279e-07	5.12679e-06	ASS1	445	ASS	ENSG00000130707
1088	100.554532378214	0.547826	1.8254	-0.868211	0.169819	-5.11257	3.17811e-07	5.38525e-06	KCNAB3	9196	AKR6A9	ENSG00000170049
1089	2885.40349485153	0.862623	1.15926	-0.213198	0.0417313	-5.10884	3.24141e-07	5.48747e-06	DOT1L	84444	DOT1	ENSG00000104885
1090	3490.75626326371	0.880062	1.13628	-0.184323	0.0360891	-5.10743	3.26563e-07	5.52341e-06	ANKS6	203286	ANKRD14	ENSG00000165138
1091	38.6188834502429	0.377334	2.65017	-1.40609	0.275336	-5.1068	3.27665e-07	5.53697e-06	RFPL3S	10737	NCRNA00005	ENSG00000205853
1092	11509.0583040661	1.14771	1.14771	0.198754	0.0389233	5.10629	3.28549e-07	5.54682e-06	TLE5	166	AES	ENSG00000104964
1093	1116.87303873589	0.784611	1.27452	-0.349951	0.068556	-5.1046	3.31502e-07	5.59155e-06	LINC01138	388685	LINC00875	ENSG00000274020
1094	128.597156751188	0.588421	1.69946	-0.765078	0.150005	-5.10036	3.39013e-07	5.71302e-06	#N/A	#N/A	#N/A	ENSG00000251615
1095	3335.49055978462	1.14609	1.14609	0.196724	0.0385845	5.09853	3.42298e-07	5.76312e-06	MARCKSL1	65108	F52	ENSG00000175130
1096	3379.13783207746	1.23224	1.23224	0.301289	0.0590997	5.09798	3.43302e-07	5.77474e-06	SPINT2	10653	DIAR3	ENSG00000167642
1097	4707.67848757062	1.15869	1.15869	0.212496	0.0416886	5.09723	3.4466e-07	5.79231e-06	DNAJB11	51726	ABBP-2	ENSG00000090520
1098	505.564294466718	0.760436	1.31504	-0.395102	0.0775347	-5.0958	3.47269e-07	5.83083e-06	TRIM16	10626	EBBP	ENSG00000221926
1099	10538.1152891791	1.11435	1.11435	0.156209	0.0306757	5.09226	3.5382e-07	5.93541e-06	AFAP1	60312	AFAP	ENSG00000196526
1100	750.874604607013	1.25812	1.25812	0.331265	0.0650667	5.09116	3.55873e-07	5.96443e-06	RASL10B	91608	RRP17	ENSG00000270885
1101	2592.73857893614	1.24716	1.24716	0.318646	0.0625939	5.09068	3.56788e-07	5.97433e-06	PLEKHB1	58473	KPL1	ENSG00000021300
1102	8550.40847506613	1.19353	1.19353	0.255231	0.0501616	5.08818	3.61514e-07	6.04797e-06	SUMO2	6613	HSMT3	ENSG00000188612
1103	2229.12932363679	1.22071	1.22071	0.287726	0.0565813	5.08518	3.67279e-07	6.13886e-06	PTPRE	5791	HPTPE	ENSG00000132334
1104	4060.90272282069	1.13891	1.13891	0.187651	0.0369044	5.08479	3.68033e-07	6.14589e-06	SEL1L	6400	Hrd3	ENSG00000071537
1105	840.429357390241	1.30281	1.30281	0.381622	0.0750722	5.08339	3.70752e-07	6.18569e-06	TSPAN18	90139	TSPAN	ENSG00000157570
1106	844.837192192259	0.768238	1.30168	-0.380375	0.0748324	-5.08303	3.71462e-07	6.19193e-06	TRIM38	10475	RNF15	ENSG00000112343
1107	1899.50303131156	1.17449	1.17449	0.232033	0.0456511	5.08274	3.7202e-07	6.19564e-06	UBE2E2	7325	UBCH8	ENSG00000182247
1108	9605.58886204174	1.12177	1.12177	0.165778	0.0326214	5.08187	3.73728e-07	6.20726e-06	ALKBH5	54890	ABH5	ENSG00000091542
1109	1070.07376798166	0.800505	1.24921	-0.321018	0.0631666	-5.08208	3.73323e-07	6.20726e-06	IFT27	11020	BBS19	ENSG00000100360
1110	1162.09649509045	1.30356	1.30356	0.382452	0.0752563	5.08199	3.73501e-07	6.20726e-06	EBPL	84650	EBRP	ENSG00000123179
1111	527.071090233525	1.43785	1.43785	0.523911	0.10312	5.08058	3.76287e-07	6.24413e-06	#N/A	#N/A	#N/A	ENSG00000226571
1112	1584.38200096335	1.20682	1.20682	0.271211	0.05342	5.07695	3.83535e-07	6.35868e-06	CD44	960	CDW44	ENSG00000026508
1113	14332.643572001	1.14266	1.14266	0.1924	0.0379163	5.07434	3.8884e-07	6.44084e-06	PAICS	10606	ADE2	ENSG00000128050
1114	475.853191507617	0.766944	1.30388	-0.382806	0.0754919	-5.07083	3.96092e-07	6.55508e-06	RPS6KL1	83694	RSKL2	ENSG00000198208
1115	2016.23000094242	1.19897	1.19897	0.261793	0.0516387	5.06971	3.98429e-07	6.58783e-06	AIG1	51390	AIG-1	ENSG00000146416
1116	69.3547763737744	0.501321	1.99473	-0.996193	0.196568	-5.06793	4.02155e-07	6.64349e-06	#N/A	#N/A	#N/A	ENSG00000249258
1117	1003.98190155958	0.822968	1.21511	-0.281092	0.0554678	-5.06766	4.02743e-07	6.64725e-06	ZNF714	148206	ZNF714	ENSG00000160352
1118	971.940664927492	0.736016	1.35867	-0.442191	0.0873074	-5.06476	4.08916e-07	6.74308e-06	#N/A	#N/A	#N/A	ENSG00000291224
1119	990.934065697567	1.29516	1.29516	0.373134	0.0736831	5.06404	4.10454e-07	6.7624e-06	OPLAH	26873	5-Opase	ENSG00000178814
1120	2428.36370828941	1.16492	1.16492	0.220225	0.043507	5.06183	4.1525e-07	6.83532e-06	PERP	64065	EKVP7	ENSG00000112378
1121	8199.28542278587	1.11276	1.11276	0.154146	0.0304551	5.06142	4.16156e-07	6.84411e-06	PAM	5066	PAL	ENSG00000145730
1122	253.549424295387	0.64924	1.54026	-0.623177	0.123184	-5.05892	4.21639e-07	6.92811e-06	ATP6V0D1-DT	101927837	ATP6V0D1-DT	ENSG00000270049
1123	21909.9531645708	1.20336	1.20336	0.267072	0.0528067	5.05753	4.24716e-07	6.97245e-06	YWHAE	7531	14-3-3E	ENSG00000108953
1124	263.139896569506	0.623545	1.60373	-0.681435	0.134794	-5.05539	4.29517e-07	7.045e-06	#N/A	#N/A	#N/A	ENSG00000270441
1125	48.3137439627802	0.449179	2.22629	-1.15464	0.228547	-5.05209	4.36993e-07	7.16125e-06	THSD1	55901	ANIB12	ENSG00000136114
1126	13980.3806948381	1.11318	1.11318	0.154682	0.030629	5.05018	4.4139e-07	7.22688e-06	DAP	1611	DAP1	ENSG00000112977
1127	3602.14425098449	0.802031	1.24684	-0.318271	0.0630548	-5.04752	4.47576e-07	7.32165e-06	RIMKLB	57494	FAM80B	ENSG00000166532
1128	31711.3785284336	1.14289	1.14289	0.192682	0.0381953	5.04465	4.5435e-07	7.42589e-06	YWHAZ	7534	14-3-3-zeta	ENSG00000164924
1129	1610.22340934853	0.824029	1.21355	-0.279233	0.0553648	-5.04351	4.5708e-07	7.46388e-06	ASB3	51130	ASB-3	ENSG00000115239
1130	58998.1460127659	1.14475	1.14475	0.195032	0.0386737	5.04302	4.58243e-07	7.47626e-06	CANX	821	CNX	ENSG00000127022
1131	603.648811287652	0.78166	1.27933	-0.355388	0.070522	-5.03939	4.67026e-07	7.61282e-06	NSUN6	221078	4933414E04Rik	ENSG00000241058
1132	4203.27071090948	0.844837	1.18366	-0.243255	0.0482765	-5.03878	4.68519e-07	7.63041e-06	CYTH1	9267	B2-1	ENSG00000108669
1133	2490.48528005448	1.18698	1.18698	0.247294	0.0490802	5.03856	4.6904e-07	7.63215e-06	HEG1	57493	HEG	ENSG00000173706
1134	390.275844621833	1.42961	1.42961	0.515621	0.102403	5.0352	4.77356e-07	7.76061e-06	STC1	6781	STC	ENSG00000159167
1135	117.555296561011	0.58538	1.70829	-0.772555	0.153494	-5.03313	4.82537e-07	7.83793e-06	RIC3	79608	AYST720	ENSG00000166405
1136	995.968376336785	1.27552	1.27552	0.351085	0.0698462	5.02655	4.99386e-07	8.10447e-06	SPATC1L	84221	C21orf56	ENSG00000160284
1137	7841.01719268646	1.1295	1.1295	0.175686	0.0349553	5.02603	5.00731e-07	8.11916e-06	SREBF2	6721	SREBP-2	ENSG00000198911
1138	1296.38734517931	1.19443	1.19443	0.256326	0.05101	5.02501	5.03407e-07	8.15536e-06	TEAD2	8463	ETF	ENSG00000074219
1139	53.3878997479576	0.477638	2.09363	-1.06601	0.212149	-5.02482	5.03914e-07	8.15642e-06	#N/A	#N/A	#N/A	ENSG00000266490
1140	14207.2280470304	0.882069	1.1337	-0.181036	0.0360355	-5.02383	5.06515e-07	8.19132e-06	SPTAN1	6709	DEE5	ENSG00000197694
1141	1203.08705413459	1.22916	1.22916	0.297667	0.0592564	5.02338	5.07705e-07	8.20337e-06	RNF5	6048	RING5	ENSG00000204308
1142	1370.65892186666	1.18413	1.18413	0.243829	0.0485432	5.02293	5.08898e-07	8.21545e-06	EMC2	9694	KIAA0103	ENSG00000104412
1143	979.415509357595	0.784095	1.27536	-0.3509	0.0699019	-5.01989	5.1701e-07	8.33911e-06	#N/A	#N/A	#N/A	ENSG00000246067
1144	284.340011670856	0.686681	1.45628	-0.542287	0.108057	-5.01853	5.20682e-07	8.39099e-06	IL11	3589	AGIF	ENSG00000095752
1145	154.309648884185	0.630256	1.58666	-0.665991	0.132723	-5.01789	5.22433e-07	8.41186e-06	TXK	7294	BTKL	ENSG00000074966
1146	235.460948203276	0.700806	1.42693	-0.512913	0.102232	-5.01713	5.24488e-07	8.43022e-06	NFKBIZ	64332	I-kappa-B-zeta	ENSG00000144802
1147	1601.72856352627	0.844151	1.18462	-0.244426	0.0487171	-5.01725	5.24153e-07	8.43022e-06	ZNF219	51222	ZFP219	ENSG00000165804
1148	9067.71254775918	1.1122	1.1122	0.153423	0.0305857	5.01616	5.27136e-07	8.46539e-06	GFPT1	2673	CMS12	ENSG00000198380
1149	773.984618036161	0.720995	1.38697	-0.471939	0.0940876	-5.01596	5.27703e-07	8.46713e-06	ZNF852	285346	ZNF852	ENSG00000178917
1150	262.311542932265	0.640805	1.56054	-0.642043	0.128019	-5.01522	5.29721e-07	8.49212e-06	H2BC18	440689	HIST2H2BF	ENSG00000203814
1151	324.326147069107	0.68682	1.45599	-0.541997	0.108102	-5.01375	5.33786e-07	8.54985e-06	CACNA1B	774	BIII	ENSG00000148408
1152	7514.83320391382	0.860851	1.16164	-0.216165	0.0431216	-5.01291	5.36124e-07	8.57984e-06	OGA	10724	MEA5	ENSG00000198408
1153	1295.93432171273	0.822798	1.21536	-0.281389	0.0561445	-5.01188	5.39006e-07	8.61593e-06	UVSSA	57654	KIAA1530	ENSG00000163945
1154	461.156688894153	1.33265	1.33265	0.414295	0.0826643	5.01177	5.39313e-07	8.61593e-06	RPP25	54913	RPP25	ENSG00000178718
1155	1012.71108143841	0.791334	1.26369	-0.337641	0.0673819	-5.01086	5.41885e-07	8.64951e-06	TRMU	55687	LCAL3	ENSG00000100416
1156	5115.03372594162	0.86108	1.16133	-0.215781	0.0430869	-5.00804	5.49866e-07	8.76932e-06	PCNT	5116	KEN	ENSG00000160299
1157	4394.17830758091	1.14708	1.14708	0.197964	0.0395362	5.00716	5.5238e-07	8.80179e-06	CHMP4B	128866	C20orf178	ENSG00000101421
1158	3941.55990595419	1.26351	1.26351	0.337437	0.0674147	5.00539	5.57494e-07	8.86795e-06	EHD2	30846	PAST2	ENSG00000024422
1159	269.575664401484	0.677768	1.47543	-0.561137	0.112106	-5.0054	5.57472e-07	8.86795e-06	HAVCR2	84868	CD366	ENSG00000135077
1160	1391.89399465334	0.824781	1.21244	-0.277916	0.0555604	-5.00206	5.6722e-07	9.01489e-06	IQCB1	9657	NPHP5	ENSG00000173226
1161	723.634451735469	0.800487	1.24924	-0.32105	0.0642166	-4.99948	5.74838e-07	9.1281e-06	TRMT12	55039	TRM12	ENSG00000183665
1162	1169.11397501696	1.21538	1.21538	0.281405	0.0562957	4.99869	5.77205e-07	9.15216e-06	LARGE2	120071	GYLTL1B	ENSG00000165905
1163	5034.56180199263	0.88582	1.1289	-0.174914	0.0349923	-4.99864	5.77347e-07	9.15216e-06	CDC42SE1	56882	SCIP1	ENSG00000197622
1164	299.991672972006	1.41603	1.41603	0.50185	0.100445	4.99626	5.84538e-07	9.25025e-06	GGACT	87769	A2LD1	ENSG00000134864
1165	108.734242907649	0.610534	1.63791	-0.711856	0.142474	-4.9964	5.84102e-07	9.25025e-06	LTB4R2	56413	BLT2	ENSG00000213906
1166	26803.0947729723	1.22282	1.22282	0.290212	0.0580954	4.99544	5.8703e-07	9.28172e-06	RPL27A	6157	L27A	ENSG00000166441
1167	8746.16610893882	1.1387	1.1387	0.187387	0.0375263	4.99347	5.93026e-07	9.36849e-06	BCL2L13	23786	BCL-RAMBO	ENSG00000099968
1168	2820.2276870748	1.16325	1.16325	0.218162	0.0436945	4.9929	5.94799e-07	9.38846e-06	B4GALT2	8704	B4Gal-T2	ENSG00000117411
1169	578.199865470273	0.786679	1.27117	-0.346152	0.0694563	-4.98374	6.23663e-07	9.83563e-06	BICD1	636	BICD	ENSG00000151746
1170	55.9210143776542	0.471138	2.12252	-1.08578	0.217974	-4.98124	6.31789e-07	9.95526e-06	#N/A	#N/A	#N/A	ENSG00000267707
1171	4778.71647080299	1.12755	1.12755	0.173195	0.0347717	4.98093	6.32803e-07	9.96273e-06	POFUT1	23509	DDD2	ENSG00000101346
1172	5369.09079036646	1.17078	1.17078	0.227468	0.0456719	4.98049	6.34246e-07	9.97692e-06	RUVBL2	10856	CGI-46	ENSG00000183207
1173	130.84966980779	0.631501	1.58353	-0.663144	0.133179	-4.97933	6.38051e-07	1.00282e-05	PRR22	163154	PRR22	ENSG00000212123
1174	2800.68041006116	1.15859	1.15859	0.212367	0.0426622	4.97788	6.42846e-07	1.0095e-05	ADGRA3	166647	GPR125	ENSG00000152990
1175	1219.9498962662	0.76786	1.30232	-0.381086	0.0766129	-4.97417	6.55281e-07	1.02815e-05	ZNF337	26152	ZNF337	ENSG00000130684
1176	768.039113131374	0.786237	1.27188	-0.346964	0.0697682	-4.9731	6.58912e-07	1.03297e-05	ZNF480	147657	ZNF480	ENSG00000198464
1177	1455.12493093405	1.22573	1.22573	0.293646	0.0590521	4.97265	6.60425e-07	1.03446e-05	PTPRM	5797	PTPRL1	ENSG00000173482
1178	11946.5322470026	1.12618	1.12618	0.171433	0.0344797	4.97201	6.62611e-07	1.03612e-05	RAB7A	7879	CMT2B	ENSG00000075785
1179	651.167823638589	1.30044	1.30044	0.379003	0.0762255	4.97212	6.62233e-07	1.03612e-05	SLC15A4	121260	FP12591	ENSG00000139370
1180	49.4274805711955	0.391825	2.55216	-1.35172	0.271894	-4.97149	6.64408e-07	1.03717e-05	PTCH2	8643	PTC2	ENSG00000117425
1181	9531.45857173529	1.16065	1.16065	0.214937	0.043233	4.97159	6.64073e-07	1.03717e-05	PHLDA1	22822	DT1P1B11	ENSG00000139289
1182	702.139454324634	0.791429	1.26354	-0.337468	0.0679028	-4.96987	6.69988e-07	1.045e-05	DCUN1D2	55208	C13orf17	ENSG00000150401
1183	246.348956003477	1.4345	1.4345	0.520551	0.10475	4.96945	6.71442e-07	1.04638e-05	ROR2	4920	BDB	ENSG00000169071
1184	1956.2636851852	1.16999	1.16999	0.226496	0.0456336	4.96337	6.92789e-07	1.07783e-05	PTGFRN	5738	CD315	ENSG00000134247
1185	620.762392037916	0.773818	1.29229	-0.369934	0.0745322	-4.96342	6.92636e-07	1.07783e-05	ZNG1B	150472	CBWD2	ENSG00000136682
1186	1662.41827510938	0.824391	1.21302	-0.278599	0.0561722	-4.95974	7.05872e-07	1.09463e-05	CHTF18	63922	C16orf41	ENSG00000127586
1187	924.869060880676	0.81591	1.22563	-0.293518	0.0591801	-4.95973	7.05895e-07	1.09463e-05	C2CD2L	9854	DLNB23	ENSG00000172375
1188	675.083967533987	0.755054	1.32441	-0.405348	0.081728	-4.95972	7.05961e-07	1.09463e-05	KANTR	102723508	LINC01155	ENSG00000232593
1189	562.764525847963	1.29812	1.29812	0.376427	0.0758968	4.95973	7.05918e-07	1.09463e-05	RPL13AP5	728658	RPL13A_8_1086	ENSG00000236552
1190	495.158995044641	1.27023	1.27023	0.345084	0.0695815	4.95942	7.07031e-07	1.09536e-05	#N/A	#N/A	#N/A	ENSG00000265749
1191	104.004160266296	0.592749	1.68705	-0.754507	0.152143	-4.95918	7.07914e-07	1.09581e-05	GDPD3	79153	GDE7	ENSG00000102886
1192	63.1119476648356	1.88981	1.88981	0.91824	0.185172	4.95884	7.0916e-07	1.09682e-05	PDK1-AS1	124900513	lncIHAT	ENSG00000225205
1193	2848.33873923915	1.18673	1.18673	0.24699	0.0498213	4.95753	7.13948e-07	1.1033e-05	IMPACT	55364	RWDD5	ENSG00000154059
1194	4058.55606974027	1.17663	1.17663	0.234662	0.0473383	4.95713	7.15415e-07	1.10464e-05	BEX3	27018	Bex	ENSG00000166681
1195	5399.72741909301	1.16927	1.16927	0.225605	0.0455154	4.95667	7.17127e-07	1.10636e-05	ERO1A	30001	ERO1-L	ENSG00000197930
1196	475.475525289254	0.759211	1.31716	-0.397427	0.0802261	-4.95384	7.27643e-07	1.12164e-05	GPR63	81491	PSP24(beta)	ENSG00000112218
1197	39.7908754264206	0.376397	2.65677	-1.40967	0.28462	-4.95282	7.31446e-07	1.12656e-05	#N/A	#N/A	#N/A	ENSG00000274460
1198	1484.77170512733	0.851756	1.17404	-0.231488	0.0467881	-4.94757	7.51445e-07	1.1564e-05	ZCCHC8	55596	PFBMFT5	ENSG00000033030
1199	2047.6318011114	0.842359	1.18714	-0.247492	0.0500539	-4.94451	7.63354e-07	1.17374e-05	FLVCR1	28982	AXPC1	ENSG00000162769
1200	34.2448358324667	0.378283	2.64352	-1.40246	0.28374	-4.94277	7.70207e-07	1.18329e-05	#N/A	#N/A	#N/A	ENSG00000238290
1201	1671.48665029414	1.18802	1.18802	0.248555	0.0502908	4.94236	7.71838e-07	1.18481e-05	CYP1B1	1545	ASGD6	ENSG00000138061
1202	16517.9867264046	1.14667	1.14667	0.197448	0.0399614	4.94098	7.77328e-07	1.19225e-05	FADS2	9415	D6D	ENSG00000134824
1203	391.010837063471	0.709105	1.41023	-0.495929	0.100448	-4.93717	7.92663e-07	1.21476e-05	KHDC1	80759	C6orf147	ENSG00000135314
1204	682.136487271738	0.792128	1.26242	-0.336195	0.068102	-4.93664	7.94804e-07	1.21703e-05	FAM81A	145773	FAM81A	ENSG00000157470
1205	1089.28540716407	1.3255	1.3255	0.406542	0.082433	4.93179	8.14808e-07	1.24662e-05	FAM162A	26355	C3orf28	ENSG00000114023
1206	1248.30436282383	0.836753	1.1951	-0.257127	0.0521628	-4.92931	8.25203e-07	1.26148e-05	HEATR5B	54497	p200	ENSG00000008869
1207	2905.5745068846	0.867404	1.15287	-0.205225	0.0416374	-4.92886	8.2712e-07	1.26336e-05	TEX15	56154	CT42	ENSG00000133863
1208	1638.24007226876	1.2172	1.2172	0.283569	0.0575391	4.92827	8.29594e-07	1.26609e-05	UBE2L6	9246	RIG-B	ENSG00000156587
1209	8044.95400702765	1.10853	1.10853	0.148653	0.0301658	4.92787	8.31321e-07	1.26768e-05	CBX1	10951	CBX	ENSG00000108468
1210	319.630430013196	0.703948	1.42056	-0.50646	0.102813	-4.92601	8.39264e-07	1.27873e-05	#N/A	#N/A	#N/A	ENSG00000253552
1211	1807.2409161127	0.817445	1.22332	-0.290806	0.0590788	-4.92234	8.55159e-07	1.30188e-05	#N/A	#N/A	#N/A	ENSG00000177337
1212	135.800327398182	0.610151	1.63894	-0.712762	0.144875	-4.91984	8.66146e-07	1.31751e-05	#N/A	#N/A	#N/A	ENSG00000245261
1213	1424.39363110233	1.19326	1.19326	0.254907	0.0518401	4.91717	8.78023e-07	1.33448e-05	DCTN6	10671	WS-3	ENSG00000104671
1214	13492.3665874642	1.15244	1.15244	0.20469	0.0416327	4.91658	8.8069e-07	1.33743e-05	MRFAP1	93621	PAM14	ENSG00000179010
1215	9136.9424187001	0.881813	1.13403	-0.181455	0.0369594	-4.90957	9.12767e-07	1.385e-05	LAMA1	284217	LAMA	ENSG00000101680
1216	862.014329675384	1.28782	1.28782	0.364935	0.0743346	4.90935	9.13787e-07	1.38541e-05	SOX9	6662	CMD1	ENSG00000125398
1217	729.638249228892	0.793333	1.2605	-0.334002	0.0680365	-4.90915	9.14711e-07	1.38567e-05	MCRIP1	348262	FAM195B	ENSG00000225663
1218	6975.79450942152	0.851503	1.17439	-0.231916	0.0472662	-4.9066	9.26709e-07	1.40269e-05	ATP1B3	483	ATPB-3	ENSG00000069849
1219	1328.96722960801	1.22565	1.22565	0.293549	0.0598425	4.90535	9.32596e-07	1.41045e-05	RBBP9	10741	BOG	ENSG00000089050
1220	392.350549535257	0.724921	1.37946	-0.464105	0.094621	-4.90488	9.34838e-07	1.41268e-05	C3orf52	79669	HYPT15	ENSG00000114529
1221	1138.14456119851	0.771331	1.29646	-0.374578	0.0763989	-4.90292	9.44227e-07	1.4257e-05	LINC00910	100130581	LINC00910	ENSG00000188825
1222	1791.71772016956	0.845933	1.18213	-0.241385	0.0492439	-4.90183	9.49472e-07	1.43147e-05	NUP43	348995	bA350J20.1	ENSG00000120253
1223	3849.78528528042	0.844295	1.18442	-0.244181	0.0498145	-4.9018	9.49601e-07	1.43147e-05	RNF44	22838	RNF44	ENSG00000146083
1224	725.786314748944	0.806927	1.23927	-0.309489	0.0631909	-4.89769	9.69716e-07	1.4606e-05	ADAT2	134637	DEADC1	ENSG00000189007
1225	532.632945777112	1.28752	1.28752	0.364594	0.074486	4.89479	9.84103e-07	1.48106e-05	DTD1	92675	C20orf88	ENSG00000125821
1226	60.2380707822765	0.492981	2.02848	-1.0204	0.208593	-4.8918	9.99175e-07	1.50251e-05	CEL	1056	BAL	ENSG00000170835
1227	1375.70670700286	0.791801	1.26294	-0.336791	0.0689104	-4.88738	1.02189e-06	1.53542e-05	TTLL7	79739	TTLL7	ENSG00000137941
1228	1188.01216078889	1.24225	1.24225	0.312955	0.0640753	4.88417	1.03866e-06	1.55934e-05	SDK1	221935	SDK1	ENSG00000146555
1229	61.4443318130518	0.51597	1.9381	-0.954641	0.195472	-4.88378	1.04072e-06	1.56116e-05	SPTBN5	51332	BSPECV	ENSG00000137877
1230	748.684230016899	0.802551	1.24603	-0.317335	0.0649802	-4.88356	1.04187e-06	1.56162e-05	RIC8B	55188	RIC8	ENSG00000111785
1231	1438.42876138489	1.20792	1.20792	0.272529	0.0558135	4.88284	1.04569e-06	1.56479e-05	FSTL3	10272	FLRG	ENSG00000070404
1232	584.206171014012	1.28909	1.28909	0.366356	0.0750276	4.88294	1.04514e-06	1.56479e-05	THAP7-AS1	439931	THAP7-AS1	ENSG00000230513
1233	2136.01937526862	1.18728	1.18728	0.247663	0.0507421	4.88082	1.05648e-06	1.57967e-05	EGFL7	51162	NEU1	ENSG00000172889
1234	89.7676964386083	1.74894	1.74894	0.806483	0.165247	4.88047	1.05835e-06	1.58118e-05	RAPGEF4	11069	CAMP-GEFII	ENSG00000091428
1235	2030.499778891	0.857906	1.16563	-0.221109	0.0453151	-4.87936	1.0643e-06	1.58878e-05	SLC26A6	65010	SLC26A6	ENSG00000225697
1236	1572.3637938237	0.828304	1.20729	-0.271768	0.0557167	-4.87767	1.07348e-06	1.60119e-05	FAM193B	54540	IRIZIO	ENSG00000146067
1237	3273.8107713382	1.16115	1.16115	0.215551	0.0442247	4.87399	1.09367e-06	1.62998e-05	AGTPBP1	23287	CCP1	ENSG00000135049
1238	164.470111111683	0.62881	1.5903	-0.669303	0.137425	-4.87032	1.11418e-06	1.65921e-05	UBE2R2-AS1	101929688	LINC01251	ENSG00000235481
1239	2528.25324816915	1.14928	1.14928	0.200729	0.0412192	4.86979	1.11716e-06	1.6623e-05	CAMK2D	817	CAMKD	ENSG00000145349
1240	2065.89716626664	1.15678	1.15678	0.210112	0.0431626	4.86792	1.12779e-06	1.67677e-05	JUN	3725	AP-1	ENSG00000177606
1241	72777.3653450467	1.23424	1.23424	0.303627	0.0623814	4.86727	1.13152e-06	1.68036e-05	ENO1	2023	ENO1-IT1	ENSG00000074800
1242	1262.06337178996	1.26099	1.26099	0.334555	0.0687369	4.86718	1.13203e-06	1.68036e-05	PARM1	25849	Cipar1	ENSG00000169116
1243	78.5605342230423	0.530233	1.88596	-0.915301	0.188094	-4.86618	1.13775e-06	1.6875e-05	WASH2P	375260	FAM39B	ENSG00000291134
1244	2473.90754477112	0.823138	1.21486	-0.280794	0.0577349	-4.8635	1.15326e-06	1.70913e-05	KIF18B	146909	KIF18B	ENSG00000186185
1245	140.806565766423	1.58515	1.58515	0.664616	0.136679	4.86259	1.15861e-06	1.71568e-05	CYP4F22	126410	ARCI5	ENSG00000171954
1246	49.4346352766619	0.473295	2.11285	-1.07919	0.221995	-4.86131	1.16612e-06	1.72541e-05	#N/A	#N/A	#N/A	ENSG00000288699
1247	2301.18205990035	1.17876	1.17876	0.237272	0.048821	4.86003	1.17369e-06	1.73521e-05	CHST15	51363	BRAG	ENSG00000182022
1248	473.947821816401	0.63101	1.58476	-0.664266	0.136726	-4.85837	1.18353e-06	1.74837e-05	GVQW3	100506127	GVQW3	ENSG00000179240
1249	2256.35195480392	1.21353	1.21353	0.279205	0.057507	4.85515	1.20298e-06	1.77567e-05	BHLHE40	8553	BHLHB2	ENSG00000134107
1250	12098.1464058374	0.87487	1.14303	-0.192859	0.0397251	-4.85485	1.20476e-06	1.77688e-05	DPP9	91039	DP9	ENSG00000142002
1251	483.699833918893	1.3376	1.3376	0.419644	0.0864503	4.85416	1.20896e-06	1.78165e-05	WIPF3	644150	CR16	ENSG00000122574
1252	698.17373207247	0.80631	1.24022	-0.310593	0.0639871	-4.85399	1.21e-06	1.78176e-05	ABHD18	80167	C4orf29	ENSG00000164074
1253	378.082151708848	1.40361	1.40361	0.489141	0.100793	4.85294	1.21645e-06	1.78982e-05	CNFN	84518	PLAC8L2	ENSG00000105427
1254	3058.29047131503	1.15255	1.15255	0.204827	0.0422854	4.84392	1.27305e-06	1.87161e-05	CDCA7L	55536	JPO2	ENSG00000164649
1255	2393.62166549957	0.837191	1.19447	-0.256372	0.0529404	-4.84265	1.28118e-06	1.88206e-05	SP2	6668	SP2	ENSG00000167182
1256	771.045314523089	0.753204	1.32766	-0.408888	0.084446	-4.842	1.28539e-06	1.88373e-05	DOCK3	1795	MOCA	ENSG00000088538
1257	2487.05819202426	1.17541	1.17541	0.233166	0.0481525	4.84224	1.28387e-06	1.88373e-05	GNAI1	2770	Gi	ENSG00000127955
1258	190.585078003061	0.608743	1.64273	-0.716094	0.14789	-4.84208	1.28487e-06	1.88373e-05	GUSBP11	91316	GUSBP11	ENSG00000228315
1259	1585.33217351178	0.851878	1.17388	-0.23128	0.0477708	-4.84146	1.28888e-06	1.88735e-05	FCHSD1	89848	NWK2	ENSG00000197948
1260	787.825577289909	1.37034	1.37034	0.454537	0.0939051	4.84038	1.29589e-06	1.89611e-05	SLC27A1	376497	ACSVL5	ENSG00000130304
1261	820.993390666799	0.813088	1.22988	-0.298516	0.0617073	-4.83761	1.3141e-06	1.92123e-05	#N/A	#N/A	#N/A	ENSG00000263072
1262	925.115484354535	0.82631	1.2102	-0.275245	0.0569554	-4.83264	1.34733e-06	1.96826e-05	THAP6	152815	THAP6	ENSG00000174796
1263	39.4822531560265	0.438223	2.28194	-1.19026	0.2464	-4.83062	1.36109e-06	1.98679e-05	#N/A	#N/A	#N/A	ENSG00000289143
1264	2066.16881505283	0.818164	1.22225	-0.289539	0.0599501	-4.82967	1.36763e-06	1.99475e-05	MCTP2	55784	MCTP2	ENSG00000140563
1265	23325.6032573415	1.10488	1.10488	0.143894	0.0298032	4.82816	1.37803e-06	2.00833e-05	PARP1	142	ADPRT	ENSG00000143799
1266	813.731145092669	1.26509	1.26509	0.339236	0.0702828	4.82673	1.38794e-06	2.02117e-05	RTN4R	65078	NGR	ENSG00000040608
1267	3099.83785207358	1.17663	1.17663	0.234665	0.0486509	4.82346	1.41092e-06	2.05302e-05	DARS2	55157	ASPRS	ENSG00000117593
1268	2134.52169277599	1.2585	1.2585	0.331707	0.068836	4.8188	1.44426e-06	2.09988e-05	MRPS18A	55168	HumanS18b	ENSG00000096080
1269	1427.92266852867	1.20306	1.20306	0.266714	0.0553519	4.81852	1.4463e-06	2.10118e-05	DLC1	10395	ARHGAP7	ENSG00000164741
1270	98.3188015550396	0.576851	1.73355	-0.793729	0.164779	-4.81693	1.45786e-06	2.11631e-05	#N/A	#N/A	#N/A	ENSG00000261459
1271	112.739059203664	1.73763	1.73763	0.79712	0.165569	4.81444	1.47616e-06	2.1395e-05	MSLN	10232	MPF	ENSG00000102854
1272	33.272569906888	0.39985	2.50094	-1.32247	0.274682	-4.81456	1.47528e-06	2.1395e-05	CHRNA10	57053	CHRNA10	ENSG00000129749
1273	590.823577209172	1.30132	1.30132	0.379972	0.0789756	4.81125	1.49986e-06	2.17215e-05	LHX6	26468	LHX6.1	ENSG00000106852
1274	68.5621369688264	0.516261	1.937	-0.953826	0.198305	-4.80989	1.51015e-06	2.18534e-05	#N/A	#N/A	#N/A	ENSG00000261251
1275	3257.10760052075	0.88323	1.13221	-0.179139	0.0372481	-4.80935	1.51422e-06	2.18951e-05	GRB10	2887	GRB-IR	ENSG00000106070
1276	4827.89276017861	1.21025	1.21025	0.275307	0.0572627	4.8078	1.52601e-06	2.20482e-05	SYNGR2	9144	SYNGR2	ENSG00000108639
1277	140.601207634269	0.619171	1.61506	-0.691591	0.143878	-4.80679	1.53373e-06	2.21425e-05	LINC01134	100133612	TLNC1	ENSG00000236423
1278	5981.57233518346	1.1725	1.1725	0.229591	0.0478319	4.79995	1.58708e-06	2.28947e-05	MYC	4609	MRTL	ENSG00000136997
1279	801.36397913459	0.806408	1.24007	-0.310418	0.0647057	-4.79738	1.6075e-06	2.31712e-05	PC	5091	PCB	ENSG00000173599
1280	1810.23174441923	1.21657	1.21657	0.28282	0.0589707	4.79593	1.61918e-06	2.33213e-05	FBLN5	10516	ADCL2	ENSG00000140092
1281	110.453298607896	0.609441	1.64085	-0.714442	0.149022	-4.79419	1.63332e-06	2.35065e-05	#N/A	#N/A	#N/A	ENSG00000224790
1282	3285.00251016164	0.852111	1.17356	-0.230886	0.0481753	-4.79263	1.64609e-06	2.36719e-05	MDN1	23195	Rea1	ENSG00000112159
1283	10477.5955055115	1.11153	1.11153	0.152541	0.0318552	4.78857	1.67977e-06	2.41374e-05	ECE1	1889	ECE	ENSG00000117298
1284	9762.01939942146	1.1087	1.1087	0.148869	0.031104	4.78616	1.70002e-06	2.44094e-05	MBTPS1	8720	PCSK8	ENSG00000140943
1285	654.406948255632	0.748952	1.3352	-0.417055	0.0871423	-4.78591	1.70212e-06	2.44204e-05	LMBR1L	55716	LIMR	ENSG00000139636
1286	370.796022754048	0.757376	1.32035	-0.400919	0.0837742	-4.78571	1.70382e-06	2.44258e-05	SNHG12	85028	ASLNC04080	ENSG00000197989
1287	221.325079535702	1.48727	1.48727	0.572666	0.119754	4.78201	1.73553e-06	2.48612e-05	#N/A	#N/A	#N/A	ENSG00000265401
1288	975.993035334722	0.824205	1.21329	-0.278924	0.058354	-4.77987	1.75407e-06	2.51072e-05	MAPK12	6300	ERK-6	ENSG00000188130
1289	1588.2626987809	1.16498	1.16498	0.220307	0.0461126	4.77759	1.77406e-06	2.53736e-05	TMEM161A	54929	AROS-29	ENSG00000064545
1290	5192.1050927731	1.1968	1.1968	0.259185	0.0542791	4.77504	1.79673e-06	2.5678e-05	HMG20B	10362	BRAF25	ENSG00000064961
1291	591.087212083825	0.794753	1.25825	-0.331421	0.0694646	-4.77108	1.83244e-06	2.6168e-05	JAKMIP3	282973	C10orf14	ENSG00000188385
1292	3036.7048800727	0.790295	1.26535	-0.339537	0.0711793	-4.77016	1.84075e-06	2.62664e-05	SLC7A11	23657	CCBR1	ENSG00000151012
1293	3654.13112597217	1.29511	1.29511	0.373071	0.0782131	4.76993	1.8429e-06	2.62767e-05	TMSB4X	7114	FX	ENSG00000205542
1294	29581.8364083226	1.09577	1.09577	0.131943	0.0276641	4.76944	1.84735e-06	2.63197e-05	GANAB	23193	G2AN	ENSG00000089597
1295	1781.33570008543	1.17492	1.17492	0.232565	0.0487643	4.76916	1.84992e-06	2.6336e-05	KIAA2013	90231	KIAA2013	ENSG00000116685
1296	38.8407922653308	0.437893	2.28366	-1.19135	0.249853	-4.7682	1.85882e-06	2.64423e-05	#N/A	#N/A	#N/A	ENSG00000262880
1297	2623.33092159308	1.15942	1.15942	0.213397	0.0447566	4.76796	1.86101e-06	2.6453e-05	ELAPOR2	222223	EIG121L	ENSG00000164659
1298	902.805520370276	0.824735	1.21251	-0.277998	0.0583157	-4.76711	1.86883e-06	2.65437e-05	USP45	85015	LCA19	ENSG00000123552
1299	1355.61132011513	0.839634	1.191	-0.252167	0.0529135	-4.76565	1.88245e-06	2.67165e-05	ANAPC4	29945	APC4	ENSG00000053900
1300	113.710189067184	0.596491	1.67647	-0.745427	0.156487	-4.76351	1.90254e-06	2.69809e-05	LOC124901661	124901661	LOC124901661	ENSG00000289108
1301	325.181467359038	0.713597	1.40135	-0.486819	0.102218	-4.76254	1.91168e-06	2.70689e-05	ZNF891	101060200	ZNF891	ENSG00000214029
1302	590.152536717793	0.783197	1.27682	-0.352553	0.0740253	-4.76261	1.91107e-06	2.70689e-05	#N/A	#N/A	#N/A	ENSG00000258603
1303	68.5143864720518	0.52555	1.90277	-0.928101	0.19491	-4.76168	1.9199e-06	2.71644e-05	CALML6	163688	CAGLP	ENSG00000169885
1304	4096.99129445606	1.15456	1.15456	0.20734	0.0435471	4.76128	1.92365e-06	2.71966e-05	RPTOR	57521	KOG1	ENSG00000141564
1305	386.833171335468	0.728469	1.37274	-0.45706	0.0960283	-4.75964	1.93934e-06	2.73975e-05	ELMOD3	84173	DFNA81	ENSG00000115459
1306	52.6529548304264	0.463932	2.15549	-1.10801	0.232884	-4.7578	1.95709e-06	2.76271e-05	DAAM2-AS1	100505635	DAAM2-AS1	ENSG00000235033
1307	1069.79933941589	0.820291	1.21908	-0.285793	0.0601009	-4.75521	1.98236e-06	2.79396e-05	KLHL42	57542	Ctb9	ENSG00000087448
1308	629.515376484196	1.28893	1.28893	0.366179	0.0770082	4.75507	1.98378e-06	2.79396e-05	MAPT	4137	DDPAC	ENSG00000186868
1309	118.838915816712	0.595059	1.68051	-0.748895	0.157485	-4.75533	1.98121e-06	2.79396e-05	#N/A	#N/A	#N/A	ENSG00000290876
1310	3645.06592762199	0.864472	1.15678	-0.21011	0.0441936	-4.7543	1.99137e-06	2.80252e-05	NBPF15	284565	AB14	ENSG00000266338
1311	10253.532203683	1.10962	1.10962	0.150065	0.0315655	4.75409	1.99346e-06	2.80331e-05	KHDRBS1	10657	Sam68	ENSG00000121774
1312	1032.34236329358	1.35119	1.35119	0.434233	0.0913746	4.75222	2.01191e-06	2.8271e-05	JMJD4	65094	JMJD4	ENSG00000081692
1313	11527.4339425093	1.12639	1.12639	0.171705	0.0361418	4.75088	2.02534e-06	2.84223e-05	ARF6	382	ARF6	ENSG00000165527
1314	224.885823133466	1.45234	1.45234	0.538379	0.113323	4.75084	2.02576e-06	2.84223e-05	#N/A	#N/A	#N/A	ENSG00000279453
1315	1799.30914828959	1.23483	1.23483	0.304307	0.0640584	4.75046	2.02959e-06	2.84544e-05	SCRN2	90507	Ses2	ENSG00000141295
1316	4431.74556299226	1.23075	1.23075	0.299539	0.0630975	4.74724	2.06208e-06	2.8888e-05	NOTCH3	4854	CADASIL	ENSG00000074181
1317	279.099042963324	0.709957	1.40854	-0.494196	0.104187	-4.74334	2.10218e-06	2.94274e-05	GOLT1A	127845	CGI-141	ENSG00000174567
1318	5303.44869849969	1.17114	1.17114	0.227916	0.0480966	4.73871	2.15078e-06	3.00848e-05	TGFB1	7040	CED	ENSG00000105329
1319	1879.29052832828	0.848756	1.17819	-0.236578	0.049958	-4.73554	2.18471e-06	3.05362e-05	ANKRD9	122416	ANKRD9	ENSG00000156381
1320	27.3732288140176	0.342939	2.91597	-1.54398	0.326185	-4.73344	2.20741e-06	3.08301e-05	GPD1	2819	GPD-C	ENSG00000167588
1321	218.830192105673	0.672238	1.48757	-0.572956	0.121085	-4.73187	2.22464e-06	3.10473e-05	EMC1-AS1	101927895	EMC1-AS1	ENSG00000230424
1322	3799.59379615457	1.1389	1.1389	0.187635	0.0396655	4.73044	2.24033e-06	3.12426e-05	SCARB1	949	CD36L1	ENSG00000073060
1323	8418.55286172698	1.20598	1.20598	0.270202	0.0571294	4.72965	2.24906e-06	3.13406e-05	B2M	567	IMD43	ENSG00000166710
1324	16971.0237713352	0.89509	1.11721	-0.159895	0.0338112	-4.72906	2.25563e-06	3.14084e-05	SF3B3	23450	RSE1	ENSG00000189091
1325	7250.16093785384	1.14103	1.14103	0.190341	0.0402535	4.72856	2.26117e-06	3.14618e-05	UGDH	7358	DEE84	ENSG00000109814
1326	2705.48282197043	1.15087	1.15087	0.202728	0.0429067	4.72486	2.30279e-06	3.20167e-05	TRAPPC1	58485	BET5	ENSG00000170043
1327	1249.08629161009	1.19043	1.19043	0.251487	0.0532344	4.72415	2.31075e-06	3.21033e-05	GLDC	2731	GCE	ENSG00000178445
1328	682.690675901378	0.714581	1.39942	-0.48483	0.102687	-4.72145	2.34168e-06	3.25084e-05	STX18-AS1	100507266	STX18-AS1	ENSG00000247708
1329	465.22459408232	1.33016	1.33016	0.411603	0.087199	4.72027	2.35531e-06	3.26665e-05	CALHM2	51063	FAM26B	ENSG00000138172
1330	38429.4132050492	1.14441	1.14441	0.194608	0.0412291	4.72016	2.35661e-06	3.26665e-05	TPM3	7170	CAPM1	ENSG00000143549
1331	2942.95158831067	1.15518	1.15518	0.208122	0.0441063	4.71864	2.37428e-06	3.28867e-05	CDKN1B	1027	CDKN4	ENSG00000111276
1332	4594.93598897704	1.1539	1.1539	0.206524	0.0437693	4.71846	2.37634e-06	3.28905e-05	RAB11A	8766	YL8	ENSG00000103769
1333	1482.89773806824	0.849615	1.177	-0.235119	0.0498568	-4.71589	2.40653e-06	3.32834e-05	WARS2-AS1	101929147	WARS2-AS1	ENSG00000231365
1334	1846.63187117692	1.2088	1.2088	0.273572	0.0580285	4.71444	2.42371e-06	3.34959e-05	TCEAL9	51186	WBP5	ENSG00000185222
1335	579.614697035836	0.703448	1.42157	-0.507485	0.107675	-4.71312	2.43954e-06	3.36894e-05	KIAA1217	56243	ETL4	ENSG00000120549
1336	205.488422972024	0.659165	1.51707	-0.60129	0.127616	-4.71171	2.45649e-06	3.3898e-05	SDHAP3	728609	SDHACL	ENSG00000291055
1337	838.755153521254	0.818334	1.22199	-0.289238	0.0613961	-4.71102	2.46478e-06	3.39871e-05	ARRDC2	27106	CLONE24945	ENSG00000105643
1338	930.678017486072	0.78605	1.27218	-0.347307	0.0737576	-4.70876	2.49233e-06	3.43413e-05	WHRN	25861	CIP98	ENSG00000095397
1339	103.527852378935	0.583665	1.71331	-0.776787	0.165003	-4.70773	2.50492e-06	3.4489e-05	#N/A	#N/A	#N/A	ENSG00000223774
1340	27234.9665699242	1.13067	1.13067	0.177172	0.0376567	4.70492	2.53964e-06	3.49148e-05	TMBIM6	7009	BAXI1	ENSG00000139644
1341	343.577068208174	0.712482	1.40354	-0.489074	0.103947	-4.70503	2.5383e-06	3.49148e-05	ZNF529-AS1	101927599	ZNF529-AS1	ENSG00000233527
1342	7616.79136352484	0.892757	1.12013	-0.163661	0.0347949	-4.70358	2.5564e-06	3.51191e-05	KRT80	144501	KB20	ENSG00000167767
1343	5294.21736701007	1.13441	1.13441	0.181945	0.0386893	4.70273	2.56703e-06	3.52388e-05	FAM114A1	92689	Noxp20	ENSG00000197712
1344	7412.44320300508	1.10646	1.10646	0.145956	0.0310397	4.70223	2.57339e-06	3.52999e-05	TSC22D2	9819	TILZ4a	ENSG00000196428
1345	102.951581237724	0.586047	1.70635	-0.770911	0.164098	-4.69788	2.62877e-06	3.60327e-05	#N/A	#N/A	#N/A	ENSG00000131152
1346	15902.8935388866	1.12272	1.12272	0.166999	0.0355718	4.69469	2.6701e-06	3.6572e-05	ACTR2	10097	ARP2	ENSG00000138071
1347	775.880383002024	1.32569	1.32569	0.406743	0.0867339	4.68955	2.73807e-06	3.74752e-05	DPCD	25911	DPCD	ENSG00000166171
1348	2373.71989085469	1.18085	1.18085	0.239827	0.0511528	4.68844	2.75298e-06	3.76513e-05	AIF1L	83543	C9orf58	ENSG00000126878
1349	929.702285478084	0.79911	1.25139	-0.323534	0.0691202	-4.68075	2.85834e-06	3.90633e-05	#N/A	#N/A	#N/A	ENSG00000267432
1350	293.078606746746	1.39328	1.39328	0.478489	0.102271	4.67863	2.88804e-06	3.94108e-05	RAB3A	5864	RAB3A	ENSG00000105649
1351	163.312179140504	0.680581	1.46933	-0.555162	0.118658	-4.67865	2.88763e-06	3.94108e-05	#N/A	#N/A	#N/A	ENSG00000291159
1352	93.3572958037294	0.587611	1.70181	-0.767067	0.163983	-4.67773	2.90073e-06	3.95546e-05	#N/A	#N/A	#N/A	ENSG00000231305
1353	6369.27026034146	1.1435	1.1435	0.193461	0.041384	4.67478	2.94276e-06	4.00981e-05	NIBAN2	64855	C9orf88	ENSG00000136830
1354	23.3916895987393	0.291094	3.43531	-1.78044	0.380923	-4.67402	2.95359e-06	4.0216e-05	#N/A	#N/A	#N/A	ENSG00000286755
1355	73.9746082614759	0.51493	1.94201	-0.957552	0.20491	-4.67304	2.96769e-06	4.03781e-05	#N/A	#N/A	#N/A	ENSG00000243410
1356	790.05703601023	1.24755	1.24755	0.319096	0.0683195	4.67064	3.00257e-06	4.08225e-05	NDUFS4	4724	AQDQ	ENSG00000164258
1357	1598.30039018633	1.20688	1.20688	0.271285	0.0580966	4.66954	3.01868e-06	4.10114e-05	PRR7	80758	PRR7	ENSG00000131188
1358	16563.5250133045	1.15404	1.15404	0.206687	0.0442711	4.66867	3.03153e-06	4.11556e-05	SERBP1	26135	CGI-55	ENSG00000142864
1359	194.581442977106	0.696896	1.43493	-0.520985	0.111604	-4.66817	3.03896e-06	4.12261e-05	EOLA2-DT	100272228	LINC00894	ENSG00000235703
1360	697.12406541999	1.30049	1.30049	0.379057	0.0812031	4.66801	3.04131e-06	4.12277e-05	CIB2	10518	DFNB48	ENSG00000136425
1361	50.104400772585	0.453711	2.20405	-1.14016	0.244274	-4.66752	3.04854e-06	4.12952e-05	#N/A	#N/A	#N/A	ENSG00000287721
1362	611.72229791052	0.794412	1.25879	-0.332041	0.0711439	-4.66718	3.05365e-06	4.13341e-05	LRRC37B	114659	LRRC37	ENSG00000185158
1363	19.9321960050714	0.271049	3.68937	-1.88338	0.403677	-4.66555	3.07797e-06	4.16328e-05	KLK14	43847	KLK-L6	ENSG00000129437
1364	404.553931362645	1.29908	1.29908	0.377494	0.0809389	4.66394	3.1021e-06	4.19283e-05	SLC22A31	146429	SLC22A31	ENSG00000259803
1365	312.152496063303	0.749278	1.33462	-0.416426	0.0893174	-4.66232	3.12665e-06	4.22293e-05	OSER1-DT	100505783	OSER1-AS1	ENSG00000223891
1366	1207.23027631542	1.25341	1.25341	0.325855	0.0699262	4.65998	3.16241e-06	4.26497e-05	NAPRT	93100	NAPRT1	ENSG00000147813
1367	1080.08037134921	1.28401	1.28401	0.360656	0.0773922	4.6601	3.16052e-06	4.26497e-05	HPS6	79803	BLOC2S3	ENSG00000166189
1368	4045.28345045225	1.12973	1.12973	0.175974	0.0377672	4.65945	3.17062e-06	4.27293e-05	SMARCA1	6594	ISWI	ENSG00000102038
1369	1571.58779907479	1.19724	1.19724	0.259708	0.0557614	4.65748	3.20109e-06	4.31083e-05	JAG2	3714	HJ2	ENSG00000184916
1370	1731.82309496522	0.861645	1.16057	-0.214834	0.0461287	-4.65727	3.20435e-06	4.31207e-05	PTPN13	5783	FAP-1	ENSG00000163629
1371	589.762015704694	0.769999	1.2987	-0.377072	0.0809719	-4.65682	3.21125e-06	4.31821e-05	NCR3LG1	374383	B7-H6	ENSG00000188211
1372	190.400509147688	0.704009	1.42044	-0.506335	0.108742	-4.65628	3.21966e-06	4.32636e-05	#N/A	#N/A	#N/A	ENSG00000267436
1373	2785.64385894148	0.799923	1.25012	-0.322066	0.0691923	-4.65465	3.24528e-06	4.35761e-05	DDX39A	10212	BAT1	ENSG00000123136
1374	2635.64974123475	0.86231	1.15968	-0.213721	0.045928	-4.6534	3.26511e-06	4.38105e-05	ATXN7	6314	ADCAII	ENSG00000163635
1375	7269.44022094413	1.14554	1.14554	0.196032	0.0421328	4.65271	3.27599e-06	4.39245e-05	SARAF	51669	FOAP-7	ENSG00000133872
1376	2848.94509834324	1.17601	1.17601	0.233901	0.0503035	4.6498	3.32256e-06	4.45165e-05	PNRC1	10957	B4-2	ENSG00000146278
1377	9799.75581884427	1.12934	1.12934	0.175481	0.0377529	4.64816	3.34909e-06	4.48394e-05	GOLM1	51280	C9orf155	ENSG00000135052
1378	16868.5511437931	1.1572	1.1572	0.210641	0.0453269	4.64714	3.36561e-06	4.50278e-05	RPL14	9045	CAG-ISL-7	ENSG00000188846
1379	149.66654576916	0.644424	1.55177	-0.633917	0.136431	-4.64642	3.3774e-06	4.5152e-05	INHA	3623	INHA	ENSG00000123999
1380	25.394351441532	0.338959	2.95021	-1.56082	0.335929	-4.64628	3.37979e-06	4.5152e-05	#N/A	#N/A	#N/A	ENSG00000242791
1381	2004.50214113118	1.15458	1.15458	0.207374	0.0446394	4.64553	3.39206e-06	4.52831e-05	GMPPA	29926	AAMR	ENSG00000144591
1382	2162.25728460137	1.18311	1.18311	0.242588	0.0522447	4.6433	3.42884e-06	4.57411e-05	THEM6	51337	C8orf55	ENSG00000130193
1383	231.828221642182	1.39103	1.39103	0.476152	0.102559	4.6427	3.43892e-06	4.58423e-05	MMAA	166785	cblA	ENSG00000151611
1384	5165.18751424612	1.22337	1.22337	0.29086	0.062667	4.64136	3.46116e-06	4.61055e-05	SNRPD1	6632	HsT2456	ENSG00000167088
1385	2360.68762833042	0.835811	1.19644	-0.258752	0.0557599	-4.64047	3.47624e-06	4.62729e-05	MORC2	22880	CMT2Z	ENSG00000133422
1386	153.050489070234	1.609	1.609	0.686161	0.147896	4.63949	3.4927e-06	4.64584e-05	MYT1	4661	C20orf36	ENSG00000196132
1387	148309.97895736	1.12585	1.12585	0.17102	0.0368675	4.63879	3.50459e-06	4.65495e-05	ACTB	60	BKRNS	ENSG00000075624
1388	4537.85110404458	0.864129	1.15723	-0.210682	0.045416	-4.63892	3.50227e-06	4.65495e-05	HGS	9146	HRS	ENSG00000185359
1389	16837.0705288068	0.8696	1.14995	-0.201576	0.0434638	-4.6378	3.52144e-06	4.67364e-05	SFPQ	6421	POMP100	ENSG00000116560
1390	4033.59487773218	1.1484	1.1484	0.199624	0.0430441	4.63766	3.52373e-06	4.67364e-05	POLG	5428	MDP1	ENSG00000140521
1391	1665.14790536497	0.843796	1.18512	-0.245034	0.0528437	-4.63695	3.53581e-06	4.68628e-05	MGME1	92667	C20orf72	ENSG00000125871
1392	2526.37754472468	1.1462	1.1462	0.196859	0.0424661	4.63567	3.55779e-06	4.70865e-05	GALNT14	79623	GALNT15	ENSG00000158089
1393	5124.36845708248	0.891162	1.12213	-0.166241	0.0358603	-4.63579	3.55584e-06	4.70865e-05	ZNF131	7690	ZBTB35	ENSG00000172262
1394	378.811449544106	1.44557	1.44557	0.531643	0.114703	4.63494	3.57035e-06	4.71849e-05	ITIH5	80760	ITI-HC5	ENSG00000123243
1395	7511.02028200201	1.18391	1.18391	0.243556	0.0525468	4.63503	3.56889e-06	4.71849e-05	PPIB	5479	CYP-S1	ENSG00000166794
1396	4882.10042785011	1.12635	1.12635	0.171658	0.0370458	4.63366	3.59255e-06	4.74443e-05	ELOVL6	79071	FACE	ENSG00000170522
1397	97.4786545349676	0.545548	1.83302	-0.874221	0.188726	-4.63221	3.61776e-06	4.7743e-05	#N/A	#N/A	#N/A	ENSG00000242798
1398	1474.90171048714	1.21332	1.21332	0.278958	0.0602251	4.63192	3.62283e-06	4.77453e-05	FAM114A2	10827	133K02	ENSG00000055147
1399	1370.32243836235	0.836655	1.19524	-0.257296	0.0555486	-4.63191	3.62311e-06	4.77453e-05	KLHDC4	54758	KLHDC4	ENSG00000104731
1400	669.490430224044	1.27703	1.27703	0.352791	0.0761885	4.6305	3.64792e-06	4.8038e-05	DALRD3	55152	DEE86	ENSG00000178149
1401	1284.5657408657	1.28927	1.28927	0.366558	0.0791681	4.63013	3.65443e-06	4.80893e-05	CHCHD10	400916	C22orf16	ENSG00000250479
1402	34.550894317873	0.392165	2.54994	-1.35047	0.291699	-4.62965	3.66286e-06	4.81659e-05	LYG1	129530	LYGA1	ENSG00000144214
1403	1135.16895700395	0.815349	1.22647	-0.294511	0.0636202	-4.62921	3.67064e-06	4.82337e-05	SATB2	23314	C2DELq32q33	ENSG00000119042
1404	1067.57823309688	1.18238	1.18238	0.241699	0.052225	4.62802	3.69172e-06	4.84762e-05	GATA2	2624	DCML	ENSG00000179348
1405	4752.51695027422	1.18603	1.18603	0.246136	0.0531907	4.62743	3.70236e-06	4.85813e-05	MYDGF	56005	C19orf10	ENSG00000074842
1406	1381.11256178357	0.798169	1.25287	-0.325233	0.0703043	-4.62608	3.72647e-06	4.88629e-05	BTNL9	153579	BTN3	ENSG00000165810
1407	576.201371506597	1.28828	1.28828	0.365451	0.0790011	4.6259	3.72974e-06	4.8871e-05	FAM20C	56975	DMP-4	ENSG00000177706
1408	5333.14862606442	1.12779	1.12779	0.173494	0.0375512	4.62021	3.83353e-06	5.01953e-05	SEPTIN9	10801	AF17q25	ENSG00000184640
1409	5187.74718975233	1.11806	1.11806	0.160994	0.0348547	4.619	3.85603e-06	5.04541e-05	BACE2	25825	AEPLC	ENSG00000182240
1410	811.052559315137	0.792869	1.26124	-0.334846	0.0725224	-4.61713	3.89082e-06	5.08732e-05	PIGF	5281	OORS	ENSG00000151665
1411	31860.421959384	1.09732	1.09732	0.133991	0.0290415	4.61377	3.95435e-06	5.16672e-05	VIM	7431	VIM	ENSG00000026025
1412	1403.60329155595	0.846812	1.1809	-0.239887	0.0520332	-4.61027	4.02152e-06	5.25077e-05	D2HGDH	728294	D2HGD	ENSG00000180902
1413	361.868988497574	1.34938	1.34938	0.432298	0.0937737	4.61001	4.0264e-06	5.25262e-05	IGFBP6	3489	IBP6	ENSG00000167779
1414	27991.125925105	1.09308	1.09308	0.128401	0.0278534	4.6099	4.02865e-06	5.25262e-05	MYO1C	4641	MMI-beta	ENSG00000197879
1415	2477.99356358284	1.17071	1.17071	0.227382	0.0493313	4.60928	4.04069e-06	5.2646e-05	BAG4	9530	BAG-4	ENSG00000156735
1416	1056.0972472071	0.824896	1.21227	-0.277716	0.0602618	-4.60849	4.05605e-06	5.28089e-05	LINC00662	148189	LINC00662	ENSG00000261824
1417	21303.1846670199	1.15053	1.15053	0.202302	0.0439014	4.60811	4.06353e-06	5.28689e-05	RPL11	6135	DBA7	ENSG00000142676
1418	822.367718258717	1.24246	1.24246	0.313205	0.067972	4.60785	4.06863e-06	5.2898e-05	RBP7	116362	CRABP4	ENSG00000162444
1419	10067.1414522525	1.2304	1.2304	0.299131	0.06498	4.60343	4.15581e-06	5.39934e-05	SNHG29	125144	C17orf45	ENSG00000175061
1420	425.859051603992	1.2838	1.2838	0.360423	0.0783685	4.59907	4.24374e-06	5.50969e-05	GHR	2690	GHBP	ENSG00000112964
1421	1352.96962173852	1.20926	1.20926	0.274122	0.059617	4.59805	4.26465e-06	5.53294e-05	GMPPB	29925	LGMDR19	ENSG00000173540
1422	1147.57810567678	1.2718	1.2718	0.346877	0.0754727	4.59606	4.30563e-06	5.58218e-05	TLCD1	116238	TLCD1	ENSG00000160606
1423	1722.97163913501	1.1549	1.1549	0.207763	0.0452134	4.59517	4.3239e-06	5.60193e-05	PREP	5550	PE	ENSG00000085377
1424	604.025220256493	1.26775	1.26775	0.342265	0.0745034	4.59394	4.34944e-06	5.63106e-05	RNLS	55328	C10orf59	ENSG00000184719
1425	615.11887936569	0.747173	1.33838	-0.420487	0.0915385	-4.59355	4.35773e-06	5.63783e-05	USP35	57558	USP35	ENSG00000118369
1426	148.250790326478	0.612916	1.63155	-0.706239	0.153801	-4.59191	4.39214e-06	5.67837e-05	ZFPM1-AS1	100128882	ZFPM1-AS1	ENSG00000261744
1427	849.213885265514	1.2774	1.2774	0.353208	0.0769259	4.59154	4.39991e-06	5.68442e-05	HLA-C	3107	D6S204	ENSG00000204525
1428	103.639396687556	0.613687	1.6295	-0.704426	0.153457	-4.59038	4.42444e-06	5.71211e-05	#N/A	#N/A	#N/A	ENSG00000231769
1429	4695.28372099692	1.15424	1.15424	0.206939	0.045097	4.58876	4.45892e-06	5.74857e-05	TIMP1	7076	CLGI	ENSG00000102265
1430	54.4856405292402	0.453579	2.20469	-1.14058	0.248554	-4.58885	4.45698e-06	5.74857e-05	#N/A	#N/A	#N/A	ENSG00000286964
1431	1457.63832893736	1.19197	1.19197	0.253349	0.0552244	4.58763	4.483e-06	5.77558e-05	FBXO27	126433	FBG5	ENSG00000161243
1432	1566.34958961083	1.17569	1.17569	0.233512	0.0509545	4.58275	4.58892e-06	5.90791e-05	LPCAT3	10162	C3F	ENSG00000111684
1433	537.645360914744	0.781946	1.27886	-0.354859	0.0774372	-4.58255	4.59351e-06	5.90969e-05	ZBTB26	57684	ZNF481	ENSG00000171448
1434	931.213684380338	1.19411	1.19411	0.255937	0.0559002	4.57847	4.68393e-06	6.02183e-05	ST6GAL1	6480	CDw75	ENSG00000073849
1435	431.993384099901	0.758003	1.31926	-0.399725	0.0873141	-4.57801	4.6941e-06	6.0307e-05	FSD1L	83856	CCDC10	ENSG00000106701
1436	4325.44776785595	1.1577	1.1577	0.211265	0.0461694	4.57586	4.74276e-06	6.08896e-05	NDUFS8	4728	CI-23k	ENSG00000110717
1437	3722.3588676343	1.12406	1.12406	0.168724	0.0368898	4.57372	4.79132e-06	6.14702e-05	RBPJ	3516	AOS3	ENSG00000168214
1438	19341.4216804948	1.23494	1.23494	0.304439	0.0665739	4.57295	4.80899e-06	6.16514e-05	TMSB10	9168	MIG12	ENSG00000034510
1439	882.719714136218	0.821132	1.21783	-0.284314	0.0621768	-4.57267	4.81547e-06	6.16514e-05	PITPNM2	57605	NIR-3	ENSG00000090975
1440	943.873271835765	0.808993	1.2361	-0.3058	0.0668746	-4.57274	4.81387e-06	6.16514e-05	EXOG	9941	ENDOGL1	ENSG00000157036
1441	13821.6882617316	1.16947	1.16947	0.225856	0.0494118	4.57088	4.85669e-06	6.2136e-05	GRN	2896	CLN11	ENSG00000030582
1442	7615.09767664008	0.882178	1.13356	-0.180858	0.0395741	-4.57011	4.87475e-06	6.22806e-05	ABLIM1	3983	ABLIM	ENSG00000099204
1443	209.11096209918	1.48222	1.48222	0.567758	0.124233	4.57012	4.87437e-06	6.22806e-05	LPAR1	1902	EDG2	ENSG00000198121
1444	2250.68885799713	1.25883	1.25883	0.332089	0.0726974	4.5681	4.92158e-06	6.27922e-05	UBE2T	29089	FANCT	ENSG00000077152
1445	205.867019723787	0.693948	1.44103	-0.527101	0.115387	-4.5681	4.92161e-06	6.27922e-05	PRANCR	101928062	CNOT2-DT	ENSG00000257815
1446	6971.94911012292	1.20524	1.20524	0.269321	0.0590221	4.56306	5.04142e-06	6.42764e-05	HNRNPDL	9987	HNRNP	ENSG00000152795
1447	2011.48606599593	0.830282	1.20441	-0.268326	0.0588095	-4.56263	5.05165e-06	6.42944e-05	CNTRL	11064	CEP1	ENSG00000119397
1448	20191.7467515104	1.10956	1.10956	0.149982	0.0328722	4.56256	5.0533e-06	6.42944e-05	SURF4	6836	ERV29	ENSG00000148248
1449	108.82734370832	1.60593	1.60593	0.68341	0.149783	4.56267	5.05062e-06	6.42944e-05	LOC124906471	124906471	LOC124906471	ENSG00000288930
1450	3326.48669504572	0.868807	1.151	-0.202893	0.0444719	-4.56227	5.06039e-06	6.43403e-05	ELP1	8518	DYS	ENSG00000070061
1451	884.761160625183	1.29725	1.29725	0.375451	0.0823298	4.56033	5.10727e-06	6.48916e-05	TMED1	11018	IL1RL1LG	ENSG00000099203
1452	110.23817136518	1.59884	1.59884	0.677026	0.148538	4.55793	5.16591e-06	6.55913e-05	CDKN1C	1028	BWCR	ENSG00000129757
1453	1799.15149802656	0.868113	1.15192	-0.204045	0.044774	-4.55721	5.18364e-06	6.5726e-05	CCDC82	79780	HSPC048	ENSG00000149231
1454	141.358179394337	0.546037	1.83138	-0.872929	0.191546	-4.55727	5.1822e-06	6.5726e-05	#N/A	#N/A	#N/A	ENSG00000285693
1455	6995.22326512392	1.13291	1.13291	0.180034	0.0395108	4.55657	5.19954e-06	6.58822e-05	DYNC2I2	89891	CFAP133	ENSG00000119333
1456	405.997724495938	0.783827	1.27579	-0.351392	0.0771287	-4.55592	5.21568e-06	6.5996e-05	SETDB2	83852	C13orf4	ENSG00000136169
1457	62.2452972748871	0.453419	2.20547	-1.14108	0.25046	-4.55595	5.21502e-06	6.5996e-05	#N/A	#N/A	#N/A	ENSG00000250900
1458	430.578428536134	0.718055	1.39265	-0.477833	0.104903	-4.555	5.23845e-06	6.62387e-05	NPW	283869	L8	ENSG00000183971
1459	5988.00615466436	1.12079	1.12079	0.164513	0.0361214	4.55444	5.25253e-06	6.63712e-05	LLGL1	3996	DLG4	ENSG00000131899
1460	4534.89270191933	1.20297	1.20297	0.266599	0.0585487	4.55345	5.27722e-06	6.66376e-05	SAP18	10284	2HOR0202	ENSG00000150459
1461	2171.74496138463	1.1601	1.1601	0.214245	0.0470594	4.55266	5.29718e-06	6.68438e-05	EXT1	2131	EXT	ENSG00000182197
1462	301.488186352896	0.695904	1.43698	-0.523041	0.114907	-4.55187	5.31718e-06	6.70503e-05	AGER	177	RAGE	ENSG00000204305
1463	128.642112060415	0.606097	1.6499	-0.722379	0.15877	-4.54984	5.36874e-06	6.76542e-05	#N/A	#N/A	#N/A	ENSG00000256433
1464	7681.94286077048	1.14762	1.14762	0.198645	0.0436618	4.54964	5.37371e-06	6.76706e-05	GNB2	2783	HG2C1	ENSG00000172354
1465	251.972682603136	0.711153	1.40617	-0.491768	0.108114	-4.54862	5.39976e-06	6.79522e-05	NLRC5	84166	CLR16.1	ENSG00000140853
1466	2036.01974698031	0.854551	1.17021	-0.226762	0.0498607	-4.5479	5.41837e-06	6.81398e-05	ABHD3	171586	LABH3	ENSG00000158201
1467	14904.1182757731	0.914203	1.09385	-0.129414	0.0284715	-4.54538	5.48362e-06	6.88541e-05	SNRNP200	23020	ASCC3L1	ENSG00000144028
1468	1868.46193362873	1.15603	1.15603	0.209178	0.0460239	4.54499	5.49384e-06	6.88541e-05	COPS7B	64708	CSN7B	ENSG00000144524
1469	1054.60495719462	0.839297	1.19147	-0.252747	0.0556087	-4.5451	5.49093e-06	6.88541e-05	NAA16	79612	NARG1L	ENSG00000172766
1470	68.4781407129659	0.473901	2.11015	-1.07734	0.237024	-4.54529	5.48596e-06	6.88541e-05	CEACAM19	56971	CEACM19	ENSG00000186567
1471	20.3305266202813	0.28713	3.48274	-1.80022	0.396085	-4.54504	5.49236e-06	6.88541e-05	#N/A	#N/A	#N/A	ENSG00000286677
1472	9433.40230484002	0.880843	1.13528	-0.183043	0.0402791	-4.54437	5.50989e-06	6.90083e-05	NT5C2	22978	GMP	ENSG00000076685
1473	2996.16866505364	0.886013	1.12865	-0.1746	0.0384315	-4.54315	5.54187e-06	6.93618e-05	REXO1	57455	ELOABP1	ENSG00000079313
1474	6644.76609393584	1.13303	1.13303	0.180187	0.0396636	4.54289	5.54893e-06	6.9403e-05	RNF187	149603	RACO-1	ENSG00000168159
1475	14.1843107140823	0.251851	3.9706	-1.98936	0.437981	-4.54211	5.56952e-06	6.96133e-05	LINC01730	101929125	LINC01730	ENSG00000275491
1476	3922.06069028538	1.11999	1.11999	0.163485	0.0359966	4.54168	5.58079e-06	6.97069e-05	MYEF2	50804	HsT18564	ENSG00000104177
1477	594.297431083017	0.804694	1.24271	-0.313488	0.069035	-4.54101	5.59865e-06	6.98827e-05	TUBD1	51174	TUBD	ENSG00000108423
1478	797.840938448006	1.3257	1.3257	0.406749	0.089577	4.54078	5.60469e-06	6.98997e-05	PTPRU	10076	FMI	ENSG00000060656
1479	1465.39944851241	0.813766	1.22885	-0.297314	0.0654779	-4.54067	5.60759e-06	6.98997e-05	KLHL22	84861	KELCHL	ENSG00000099910
1480	3915.49314873183	1.13269	1.13269	0.179752	0.0396203	4.53686	5.70985e-06	7.11262e-05	ERP44	23071	PDIA10	ENSG00000023318
1481	5879.79425782803	1.13173	1.13173	0.178535	0.0393552	4.53649	5.71986e-06	7.12028e-05	ADAM10	102	AD10	ENSG00000137845
1482	1046.24032633915	1.20624	1.20624	0.270514	0.0596455	4.53536	5.75061e-06	7.15373e-05	CDKN2B	1030	CDK4I	ENSG00000147883
1483	1691.70187643375	1.223	1.223	0.290427	0.0640404	4.53505	5.75889e-06	7.1592e-05	MRPL57	78988	MRP63	ENSG00000173141
1484	373.867525980256	0.768759	1.3008	-0.379396	0.0836697	-4.53445	5.77545e-06	7.17495e-05	KRBOX4	55634	ZNF673	ENSG00000147121
1485	45.7723390983956	0.426511	2.34461	-1.22935	0.271153	-4.53377	5.79396e-06	7.19309e-05	LOC105370941	105370941	LOC105370941	ENSG00000261136
1486	1398.37423395159	1.26064	1.26064	0.334161	0.0737072	4.53363	5.79796e-06	7.19322e-05	HLA-B	3106	AS	ENSG00000234745
1487	6876.9662536569	1.14928	1.14928	0.200735	0.0442954	4.53173	5.85029e-06	7.25326e-05	POM121C	100101267	POM121-2	ENSG00000272391
1488	6659.02482628059	1.14774	1.14774	0.198799	0.0438716	4.53138	5.85995e-06	7.26035e-05	NDUFS2	4720	CI-49	ENSG00000158864
1489	2162.30583056204	1.16664	1.16664	0.222359	0.0490871	4.5299	5.90125e-06	7.30661e-05	PGRMC2	10424	DG6	ENSG00000164040
1490	686.059039173111	1.36535	1.36535	0.449266	0.0991822	4.5297	5.90673e-06	7.30849e-05	LTBP2	4053	C14orf141	ENSG00000119681
1491	751.478399910664	1.25952	1.25952	0.332874	0.0735041	4.52864	5.93637e-06	7.34024e-05	RFT1	91869	CDG1N	ENSG00000163933
1492	3357.47650863527	1.1739	1.1739	0.231306	0.0511105	4.52562	6.02196e-06	7.44108e-05	EAPP	55837	BM036	ENSG00000129518
1493	2228.91064233448	1.17631	1.17631	0.23427	0.0517794	4.5244	6.0568e-06	7.47911e-05	VSIR	64115	B7-H5	ENSG00000107738
1494	1189.78533691235	0.805415	1.2416	-0.312196	0.0690121	-4.52379	6.07427e-06	7.49566e-05	LINC03006	441242	LINC03006	ENSG00000290926
1495	48.7513840881886	0.471287	2.12185	-1.08532	0.239939	-4.52332	6.08775e-06	7.50727e-05	GPR35	2859	GPR35	ENSG00000178623
1496	11746.0792261056	0.897804	1.11383	-0.155527	0.0343915	-4.52225	6.11865e-06	7.54034e-05	GCN1	10985	GCN1L	ENSG00000089154
1497	243.203685408246	1.42871	1.42871	0.514714	0.113835	4.52158	6.13797e-06	7.5591e-05	PLXNB3	5365	PLEXB3	ENSG00000198753
1498	467.62394896777	0.741008	1.34951	-0.432439	0.095648	-4.52116	6.15029e-06	7.5692e-05	HAP1	9001	HAP2	ENSG00000173805
1499	7009.92992690367	1.18287	1.18287	0.242291	0.0536502	4.51612	6.29827e-06	7.74615e-05	CNBP	7555	CNBP1	ENSG00000169714
1500	116.044060590101	0.636276	1.57164	-0.652275	0.144463	-4.51518	6.32631e-06	7.77546e-05	#N/A	#N/A	#N/A	ENSG00000254602
1501	1895.97680633282	0.859673	1.16323	-0.21814	0.0483374	-4.51286	6.39606e-06	7.85595e-05	CEP85	64793	CCDC21	ENSG00000130695
1502	5793.67857673411	0.868718	1.15112	-0.20304	0.0450083	-4.51118	6.44692e-06	7.91314e-05	CELF1	10658	BRUNOL2	ENSG00000149187
1503	2684.25327107516	0.878075	1.13885	-0.187584	0.0415959	-4.50967	6.49279e-06	7.96119e-05	ZNF740	283337	Zfp740	ENSG00000139651
1504	49.0514660020927	0.483877	2.06664	-1.04729	0.232235	-4.50961	6.4947e-06	7.96119e-05	LINC02102	100505625	LINC02102	ENSG00000248677
1505	18.8582380174746	0.309215	3.23399	-1.69332	0.375636	-4.50787	6.54816e-06	8.02138e-05	MIR194-2HG	105369343	MIR194-2HG	ENSG00000229719
1506	71.8645176042172	0.528245	1.89306	-0.920721	0.204276	-4.50724	6.56758e-06	8.03984e-05	#N/A	#N/A	#N/A	ENSG00000266933
1507	1203.48137066759	0.807606	1.23823	-0.308277	0.0684057	-4.5066	6.58743e-06	8.05878e-05	ZNF718	255403	ZNF718	ENSG00000250312
1508	1072.99348717254	0.839011	1.19188	-0.253239	0.0562481	-4.50218	6.72612e-06	8.223e-05	ZNF641	121274	ZNF641	ENSG00000167528
1509	1939.9328852571	1.19531	1.19531	0.257384	0.0571778	4.50147	6.74844e-06	8.24443e-05	OLFM2	93145	NOE2	ENSG00000105088
1510	40.1478082270875	0.454397	2.20072	-1.13798	0.252808	-4.50134	6.7526e-06	8.24443e-05	CPB2-AS1	100509894	CPB2-AS1	ENSG00000235903
1511	706.488440179993	0.783725	1.27596	-0.35158	0.0781359	-4.49959	6.80835e-06	8.307e-05	OFD1	8481	71-7A	ENSG00000046651
1512	51.9772430376538	0.50392	1.98444	-0.988733	0.219771	-4.49891	6.83014e-06	8.32807e-05	LOC105375798	105375798	LOC105375798	ENSG00000254812
1513	746.741741367544	1.22243	1.22243	0.289757	0.0644153	4.49825	6.85139e-06	8.34846e-05	DSC3	1825	CDHF3	ENSG00000134762
1514	107.218503640517	0.552737	1.80918	-0.855334	0.1902	-4.49702	6.89111e-06	8.39131e-05	#N/A	#N/A	#N/A	ENSG00000287737
1515	8583.57890248135	1.1714	1.1714	0.228238	0.0507744	4.49513	6.95283e-06	8.45531e-05	EDF1	8721	CFAP280	ENSG00000107223
1516	294.517557004689	0.72354	1.38209	-0.466855	0.103858	-4.49514	6.95252e-06	8.45531e-05	H2BC11	8970	H2B/r	ENSG00000124635
1517	4832.72706017321	1.19128	1.19128	0.252508	0.0561764	4.49492	6.95954e-06	8.45789e-05	XBP1	7494	TREB-5	ENSG00000100219
1518	3474.07314120254	0.871358	1.14763	-0.198663	0.044202	-4.49443	6.9757e-06	8.47193e-05	GIT2	9815	CAT-2	ENSG00000139436
1519	313.96842421233	0.728729	1.37225	-0.456546	0.101591	-4.49398	6.99053e-06	8.48436e-05	LINC00174	285908	NCRNA00174	ENSG00000179406
1520	609.322340463701	0.790397	1.26519	-0.339351	0.0755207	-4.49348	7.00672e-06	8.49841e-05	LOC729732	729732	LOC729732	ENSG00000283674
1521	1255.62355033995	0.826025	1.21062	-0.275742	0.0613758	-4.49269	7.03293e-06	8.52459e-05	SCN8A	6334	BFIS5	ENSG00000196876
1522	245.909244093835	0.724827	1.37964	-0.464292	0.103426	-4.48913	7.15162e-06	8.66277e-05	TXLNGY	246126	CYorf15A	ENSG00000291033
1523	52.2193448756847	0.464249	2.15402	-1.10703	0.246765	-4.48617	7.25162e-06	8.77812e-05	AVIL	10677	ADVIL	ENSG00000135407
1524	659.044849499031	1.23502	1.23502	0.304532	0.0679111	4.48427	7.31628e-06	8.845e-05	CTBS	1486	CTB	ENSG00000117151
1525	8631.28061699068	0.871932	1.14688	-0.197713	0.0440904	-4.48427	7.31646e-06	8.845e-05	VPS13A	23230	BLTP5A	ENSG00000197969
1526	1049.70129912343	0.825295	1.21169	-0.277019	0.0617898	-4.48324	7.3519e-06	8.88202e-05	CEP152	22995	MCPH4	ENSG00000103995
1527	6041.60782835965	1.14156	1.14156	0.191009	0.0426242	4.48122	7.42165e-06	8.96042e-05	CHCHD3	54927	MICOS19	ENSG00000106554
1528	273.154029951587	1.33295	1.33295	0.414619	0.0925792	4.47853	7.51594e-06	9.06831e-05	COLCA1	399948	C11orf92	ENSG00000196167
1529	2936.45653659439	1.1565	1.1565	0.209762	0.046848	4.47751	7.55183e-06	9.10565e-05	ALAS1	211	ALAS	ENSG00000023330
1530	7882.81603864643	1.13024	1.13024	0.176628	0.0394533	4.47688	7.57408e-06	9.12651e-05	ARPC2	10109	ARC34	ENSG00000163466
1531	4224.7348275135	1.22471	1.22471	0.292441	0.0653508	4.47494	7.64313e-06	9.20026e-05	SFN	2810	YWHAS	ENSG00000175793
1532	3280.26779986966	0.868991	1.15076	-0.202587	0.0452721	-4.47488	7.64526e-06	9.20026e-05	KMT2B	9757	CXXC10	ENSG00000272333
1533	1382.94103485862	0.84728	1.18025	-0.23909	0.0534314	-4.47471	7.65166e-06	9.20196e-05	ANKRD18A	253650	ANKRD18A	ENSG00000180071
1534	81.2394579910248	1.7082	1.7082	0.772474	0.172685	4.47332	7.70154e-06	9.2559e-05	TOX3	27324	CAGF9	ENSG00000103460
1535	4228.32735659237	1.19341	1.19341	0.255095	0.0570283	4.47312	7.70848e-06	9.25821e-05	EPB41L1	2036	4.1N	ENSG00000088367
1536	91.7808801626843	0.497345	2.01068	-1.00768	0.22541	-4.47045	7.8055e-06	9.36864e-05	FMNL1-DT	339192	FMNL1-DT	ENSG00000267121
1537	1930.25013309477	1.16894	1.16894	0.225206	0.0503916	4.46911	7.85469e-06	9.42153e-05	ASIC1	41	ACCN2	ENSG00000110881
1538	3491.09794614905	1.14489	1.14489	0.195213	0.043742	4.46283	8.08838e-06	9.69309e-05	SDC4	6385	SYND4	ENSG00000124145
1539	32339.6811098692	1.16969	1.16969	0.226127	0.0506698	4.46275	8.0916e-06	9.69309e-05	RPL12	6136	L12	ENSG00000197958
1540	630.650368397975	1.28235	1.28235	0.358787	0.0803987	4.46259	8.0975e-06	9.69386e-05	SERINC2	347735	FKSG84	ENSG00000168528
1541	1559.41216109012	0.853218	1.17203	-0.229014	0.0513304	-4.46156	8.1364e-06	9.73411e-05	SLF1	84250	ANKRD32	ENSG00000133302
1542	25402.4332404102	1.10901	1.10901	0.149266	0.0334634	4.46058	8.17383e-06	9.76627e-05	PYGL	5836	GSD6	ENSG00000100504
1543	237.820296101974	0.694714	1.43944	-0.525508	0.117812	-4.46058	8.17388e-06	9.76627e-05	SH3BP5-AS1	100505696	SH3BP5-AS1	ENSG00000224660
1544	2612.60653621255	0.864016	1.15739	-0.21087	0.047296	-4.45851	8.25305e-06	9.85448e-05	PVT1	5820	LINC00079	ENSG00000249859
1545	3382.02433921223	0.884219	1.13094	-0.177525	0.039819	-4.4583	8.2612e-06	9.85783e-05	TMCO3	55002	C13orf11	ENSG00000150403
1546	357.995921671904	1.42407	1.42407	0.510024	0.11448	4.45511	8.38483e-06	9.99888e-05	#N/A	#N/A	#N/A	ENSG00000285505
1547	129.308410122537	0.594491	1.68211	-0.750273	0.168473	-4.45336	8.45364e-06	0.000100744	ZNF596	169270	ZNF596	ENSG00000172748
1548	626.105595827693	0.793103	1.26087	-0.33442	0.0750995	-4.45302	8.46695e-06	0.000100838	FHIP1B	84067	C11orf56	ENSG00000051009
1549	217.90181742611	0.689902	1.44948	-0.535538	0.120285	-4.45224	8.49804e-06	0.000101143	#N/A	#N/A	#N/A	ENSG00000291061
1550	4033.87822929939	1.19053	1.19053	0.251602	0.0565248	4.45117	8.54028e-06	0.00010158	ALG3	10195	CDG1D	ENSG00000214160
1551	170.539102439082	1.46274	1.46274	0.54867	0.123272	4.45089	8.55164e-06	0.000101584	VEGFC	7424	Flt4-L	ENSG00000150630
1552	159.45627988117	0.678097	1.47471	-0.560436	0.125915	-4.45092	8.55012e-06	0.000101584	PDPR2P	283922	PDPR2P	ENSG00000290890
1553	149.996362980695	0.651552	1.5348	-0.618048	0.138872	-4.45047	8.56824e-06	0.000101715	GLUD1P3	2749	C10orf102	ENSG00000291043
1554	1605.63585241246	0.860114	1.16264	-0.2174	0.0488978	-4.44601	8.748e-06	0.000103783	MYSM1	114803	2A-DUB	ENSG00000162601
1555	69.4480900856486	0.509141	1.96409	-0.973864	0.219119	-4.44446	8.81127e-06	0.000104466	#N/A	#N/A	#N/A	ENSG00000272562
1556	572.461474292295	1.27164	1.27164	0.346687	0.0780176	4.44371	8.84227e-06	0.000104766	HSD17B14	51171	DHRS10	ENSG00000087076
1557	69.1997233759116	0.55128	1.81396	-0.859142	0.193512	-4.43973	9.00724e-06	0.000106652	H4C12	8362	H4-16	ENSG00000273542
1558	6279.6391254035	1.11994	1.11994	0.163424	0.0368144	4.43914	9.03181e-06	0.000106857	ALDH7A1	501	ATQ1	ENSG00000164904
1559	12520.8885258904	1.2217	1.2217	0.288885	0.0650782	4.43904	9.03614e-06	0.000106857	RPL36AL	6166	RPL36A	ENSG00000165502
1560	1252.20033427969	0.853391	1.1718	-0.22872	0.0515326	-4.43836	9.06467e-06	0.000107126	FAM161A	84140	RP28	ENSG00000170264
1561	61.7309024182192	0.529401	1.88893	-0.917566	0.206788	-4.43723	9.11259e-06	0.000107623	#N/A	#N/A	#N/A	ENSG00000288107
1562	1061.73334539327	1.19521	1.19521	0.257261	0.0579813	4.43697	9.12348e-06	0.000107683	FZD2	2535	Fz2	ENSG00000180340
1563	68.4832033107759	0.490897	2.03709	-1.02651	0.231392	-4.43623	9.1547e-06	0.000107982	CLDN9	9080	DFNB116	ENSG00000213937
1564	197.939898726891	0.639944	1.56264	-0.643983	0.14519	-4.43546	9.1877e-06	0.000108302	INTS6-AS1	100507398	INTS6-AS1	ENSG00000236778
1565	219.36347303278	0.700549	1.42745	-0.513443	0.115763	-4.4353	9.19443e-06	0.000108312	RFX3-DT	101929302	CVAT7	ENSG00000232104
1566	199.10989524903	0.69556	1.43769	-0.523752	0.118121	-4.43404	9.2482e-06	0.000108876	KHDC1-AS1	122539212	KHDC1-AS1	ENSG00000229852
1567	2107.93643007274	1.25247	1.25247	0.324777	0.0732529	4.43364	9.26538e-06	0.000108996	PALM	5064	PALM1	ENSG00000099864
1568	439.603647771487	0.735234	1.36011	-0.443725	0.100084	-4.43353	9.27025e-06	0.000108996	MAMDC4	158056	AEGP	ENSG00000177943
1569	1379.59069547204	1.1682	1.1682	0.22429	0.0506065	4.43203	9.33486e-06	0.000109686	DHDDS	79947	CIT	ENSG00000117682
1570	3878.45182985594	1.13545	1.13545	0.183268	0.0413571	4.43136	9.36405e-06	0.000109959	CST3	1471	ARMD11	ENSG00000101439
1571	1001.64188567395	1.25162	1.25162	0.323799	0.0730722	4.43122	9.37025e-06	0.000109962	#N/A	#N/A	#N/A	ENSG00000291174
1572	83.3460245875657	1.71382	1.71382	0.777219	0.175425	4.4305	9.40149e-06	0.000110224	CDC42EP5	148170	Borg3	ENSG00000167617
1573	102.617850826163	0.605195	1.65236	-0.724528	0.163535	-4.43043	9.40458e-06	0.000110224	ARHGEF2-AS2	107985209	ARHGEF2-AS2	ENSG00000273002
1574	4710.97066172621	1.16478	1.16478	0.220057	0.0496923	4.42839	9.49386e-06	0.0001112	FIS1	51024	CGI-135	ENSG00000214253
1575	1479.90942862304	0.867455	1.1528	-0.205139	0.0463271	-4.42806	9.50852e-06	0.000111301	AP4S1	11154	AP47B	ENSG00000100478
1576	742.059819317388	0.812549	1.23069	-0.299473	0.0676341	-4.42783	9.51843e-06	0.000111346	RGS20	8601	RGSZ1	ENSG00000147509
1577	1524.65954137387	1.17038	1.17038	0.22698	0.0512755	4.42667	9.56971e-06	0.000111875	ZNF292	23036	MRD63	ENSG00000188994
1578	311.191234373199	0.696199	1.43637	-0.522428	0.118026	-4.42637	9.58336e-06	0.000111964	#N/A	#N/A	#N/A	ENSG00000293192
1579	202.478452369814	1.48141	1.48141	0.566975	0.128122	4.42527	9.63224e-06	0.000112404	NRN1	51299	NRN	ENSG00000124785
1580	220.688616234472	0.652438	1.53271	-0.616086	0.139221	-4.42525	9.63323e-06	0.000112404	C1S	716	EDSPD2	ENSG00000182326
1581	379.341875573487	1.34685	1.34685	0.429591	0.0971013	4.42415	9.68211e-06	0.000112903	RNASET2	8635	RNASE6PL	ENSG00000026297
1582	3710.67355048609	1.12805	1.12805	0.173832	0.0392944	4.42384	9.69617e-06	0.000112906	RHOQ	23433	ARHQ	ENSG00000119729
1583	3492.50328144721	1.13393	1.13393	0.181332	0.0409906	4.42374	9.70078e-06	0.000112906	MBOAT7	79143	BB1	ENSG00000125505
1584	1190.50750308972	1.29907	1.29907	0.377483	0.0853291	4.42384	9.69603e-06	0.000112906	ASL	435	ASAL	ENSG00000126522
1585	173.60540818891	0.695528	1.43776	-0.523819	0.118452	-4.42221	9.76943e-06	0.000113634	#N/A	#N/A	#N/A	ENSG00000260269
1586	5781.75572105831	1.10871	1.10871	0.148882	0.0336834	4.42003	9.86852e-06	0.000114714	UBTF	7343	CONDBA	ENSG00000108312
1587	1736.62555188317	1.1863	1.1863	0.246474	0.0557665	4.41976	9.88108e-06	0.000114787	TMEM54	113452	BCLP	ENSG00000121900
1588	5457.87229818858	0.878975	1.13769	-0.186105	0.0421362	-4.41675	1.00194e-05	0.000116248	ARHGEF11	9826	GTRAP48	ENSG00000132694
1589	254.782240867216	0.733923	1.36254	-0.446299	0.101045	-4.41685	1.00151e-05	0.000116248	#N/A	#N/A	#N/A	ENSG00000288891
1590	424.604925185246	1.26609	1.26609	0.340383	0.0771281	4.41322	1.01847e-05	0.000118091	CXorf38	159013	CXorf38	ENSG00000185753
1591	1522.81606106801	0.850996	1.17509	-0.232775	0.05275	-4.4128	1.02041e-05	0.000118242	CXXC1	30827	2410002I16Rik	ENSG00000154832
1592	2339.17092199239	1.16059	1.16059	0.214856	0.0486982	4.412	1.02421e-05	0.000118608	RNF2	6045	BAP-1	ENSG00000121481
1593	859.799580456671	0.824458	1.21292	-0.278482	0.0631355	-4.41086	1.02962e-05	0.000119159	CLCN2	1181	CIC-2	ENSG00000114859
1594	20101.3885559689	1.22399	1.22399	0.291591	0.0661342	4.40907	1.03814e-05	0.000119995	TFRC	7037	CD71	ENSG00000072274
1595	312.455722523124	0.702381	1.42373	-0.509674	0.115596	-4.4091	1.038e-05	0.000119995	BCL2L2-PABPN1	100529063	BCL2L2-PABPN1	ENSG00000258643
1596	944.039950475602	0.794508	1.25864	-0.331867	0.0752773	-4.40859	1.04044e-05	0.000120186	C5orf34	375444	C5orf34	ENSG00000172244
1597	1307.77963246316	0.859532	1.16342	-0.218376	0.0495657	-4.4058	1.05394e-05	0.000121669	TMEM161B	153396	FLB3342	ENSG00000164180
1598	2985.92900659585	1.13087	1.13087	0.177434	0.0402752	4.40554	1.0552e-05	0.000121738	SLC2A4RG	56731	GEF	ENSG00000125520
1599	3677.99308488285	1.16818	1.16818	0.224265	0.0509367	4.40282	1.06852e-05	0.000123145	LIMCH1	22998	LIMCH1A	ENSG00000064042
1600	4176.3781565467	1.12294	1.12294	0.167287	0.0379958	4.40278	1.06874e-05	0.000123145	SCAMP4	113178	SCAMP-4	ENSG00000227500
1601	1175.87148722701	0.844906	1.18356	-0.243138	0.0552257	-4.40262	1.0695e-05	0.000123156	#N/A	#N/A	#N/A	ENSG00000286129
1602	53.1302968049955	0.485698	2.05889	-1.04187	0.236778	-4.40019	1.08158e-05	0.000124392	SLC25A34	284723	SLC25A34	ENSG00000162461
1603	2265.46748330319	0.876334	1.14112	-0.190448	0.0432815	-4.40021	1.08147e-05	0.000124392	AP5B1	91056	AP-5	ENSG00000254470
1604	4179.78051607989	0.892573	1.12036	-0.163958	0.0372635	-4.39995	1.08274e-05	0.000124448	CAMSAP2	23271	CAMSAP1L1	ENSG00000118200
1605	950.453288699373	0.826395	1.21007	-0.275096	0.0625272	-4.39963	1.08436e-05	0.000124556	GLCCI1	113263	FAM117C	ENSG00000106415
1606	2283.47708781183	1.13408	1.13408	0.181521	0.0412696	4.39842	1.09041e-05	0.000125096	CCDC25	55246	CCDC25	ENSG00000147419
1607	3185.95465557948	1.13147	1.13147	0.178203	0.0405141	4.39855	1.08977e-05	0.000125096	ABCA3	21	ABC-C	ENSG00000167972
1608	82.3213507781541	0.562153	1.77887	-0.830964	0.188943	-4.39796	1.09274e-05	0.000125284	PMFBP1	83449	SPGF31	ENSG00000118557
1609	1055.12444353765	0.812044	1.23146	-0.30037	0.0683117	-4.39706	1.09729e-05	0.000125728	ZNF789	285989	ZNF789	ENSG00000198556
1610	3795.92033222966	0.865913	1.15485	-0.207705	0.0472391	-4.3969	1.09809e-05	0.000125742	POLR1A	25885	A190	ENSG00000068654
1611	158.527281273668	0.67909	1.47256	-0.558326	0.126992	-4.39653	1.09995e-05	0.000125876	#N/A	#N/A	#N/A	ENSG00000272599
1612	295.848495243041	0.744003	1.34408	-0.426619	0.097076	-4.39469	1.10931e-05	0.000126869	RAB39B	116442	BGMR	ENSG00000155961
1613	6554.33992765234	1.10123	1.10123	0.139114	0.031664	4.39343	1.11576e-05	0.000127527	YEATS2	55689	FAME4	ENSG00000163872
1614	205.566657971178	1.40445	1.40445	0.490002	0.111563	4.39214	1.1224e-05	0.000128134	LRRC4B	94030	HSM	ENSG00000131409
1615	120.482592084392	1.58685	1.58685	0.666163	0.151672	4.39213	1.12246e-05	0.000128134	KREMEN2	79412	KRM2	ENSG00000131650
1616	737.272989093421	1.21335	1.21335	0.279	0.0635326	4.39144	1.12601e-05	0.00012846	CPE	1363	BDVS	ENSG00000109472
1617	7990.76048128248	1.09685	1.09685	0.133361	0.030382	4.38946	1.13634e-05	0.000129559	FXR1	8087	CMYP9A	ENSG00000114416
1618	946.743949450471	1.2236	1.2236	0.291131	0.0663289	4.38921	1.13764e-05	0.000129626	CELSR1	9620	ADGRC1	ENSG00000075275
1619	116.925519102279	0.578331	1.72911	-0.790033	0.180024	-4.3885	1.14136e-05	0.00012997	#N/A	#N/A	#N/A	ENSG00000259205
1620	3133.74786926536	0.866052	1.15467	-0.207475	0.0472914	-4.38716	1.14842e-05	0.000130694	TACC2	10579	AZU-1	ENSG00000138162
1621	2374.24856433745	0.84662	1.18117	-0.240213	0.0547592	-4.38672	1.15075e-05	0.000130877	TNK2	10188	ACK	ENSG00000061938
1622	563.212116039529	0.743601	1.34481	-0.4274	0.0974646	-4.38518	1.15891e-05	0.000131724	RGL3	57139	RGL3	ENSG00000205517
1623	573.776590226157	0.799986	1.25002	-0.321953	0.0734276	-4.38463	1.16185e-05	0.000131977	ILF3-DT	147727	ILF3-AS1	ENSG00000267100
1624	1035.22567207707	0.853679	1.1714	-0.228235	0.0520741	-4.38289	1.17118e-05	0.000132954	HECTD2	143279	HECTD2	ENSG00000165338
1625	261.408416092975	0.713863	1.40083	-0.486281	0.110975	-4.3819	1.17647e-05	0.000133473	HERC2P2	400322	D15F37S3	ENSG00000291003
1626	314.725300229102	0.759162	1.31724	-0.39752	0.0907656	-4.37964	1.18878e-05	0.000134786	SPATA24	202051	CCDC161	ENSG00000170469
1627	523.882471840673	0.788956	1.2675	-0.341983	0.0781195	-4.37769	1.19946e-05	0.000135914	MTERF2	80298	MTERFD3	ENSG00000120832
1628	332.493008267661	0.693689	1.44157	-0.527639	0.120538	-4.37737	1.20119e-05	0.000136026	PROCA1	147011	PROCA1	ENSG00000167525
1629	99.1957881655772	0.615356	1.62507	-0.700506	0.160063	-4.37644	1.20631e-05	0.000136523	#N/A	#N/A	#N/A	ENSG00000237491
1630	155.371339124858	0.647199	1.54512	-0.62772	0.143489	-4.37467	1.21614e-05	0.000137551	RRAGC-DT	105378663	LENGA	ENSG00000228436
1631	4732.18318713631	1.21309	1.21309	0.278682	0.0637056	4.37452	1.21697e-05	0.000137561	PLBD2	196463	P76	ENSG00000151176
1632	662.41411573175	0.816816	1.22427	-0.291917	0.0667696	-4.372	1.23111e-05	0.000139073	HEMK1	51409	HEMK	ENSG00000114735
1633	3306.72902837889	0.861477	1.1608	-0.215116	0.0492101	-4.37138	1.23466e-05	0.000139389	ATR	545	FCTCS	ENSG00000175054
1634	9085.89849652633	1.12036	1.12036	0.163961	0.0375091	4.37123	1.23549e-05	0.000139398	PALM2AKAP2	445815	AKAP-2	ENSG00000157654
1635	46649.2368969358	1.18333	1.18333	0.242848	0.0555662	4.37042	1.24008e-05	0.00013983	RPS6	6194	S6	ENSG00000137154
1636	781.500130596754	1.20977	1.20977	0.274736	0.0628905	4.36848	1.25115e-05	0.000140992	DDAH2	23564	DDAH	ENSG00000213722
1637	12.374068745811	0.1968	5.0813	-2.3452	0.536961	-4.36754	1.25654e-05	0.000141512	HGFAC	3083	HGFA	ENSG00000109758
1638	63.7748211929286	0.56782	1.76112	-0.816493	0.187089	-4.3642	1.27588e-05	0.000143603	#N/A	#N/A	#N/A	ENSG00000286909
1639	555.101148693553	0.771636	1.29595	-0.374008	0.0857072	-4.36378	1.27833e-05	0.000143791	#N/A	#N/A	#N/A	ENSG00000238058
1640	190.033396819794	0.647025	1.54553	-0.628106	0.143964	-4.36294	1.28324e-05	0.000144255	VPS13B-DT	105375666	OLC8	ENSG00000253948
1641	1140.55518666268	0.828413	1.20713	-0.271579	0.0622716	-4.3612	1.29353e-05	0.000145323	YJU2B	81576	CCDC130	ENSG00000104957
1642	161.670399340165	0.699622	1.42934	-0.515352	0.118185	-4.36057	1.29722e-05	0.000145649	#N/A	#N/A	#N/A	ENSG00000286456
1643	3215.64111504864	1.12923	1.12923	0.175336	0.0402141	4.36006	1.30028e-05	0.000145903	SPATA20	64847	HEL-S-98	ENSG00000006282
1644	37.8352954585745	0.450155	2.22146	-1.15151	0.264191	-4.35862	1.30884e-05	0.000146774	#N/A	#N/A	#N/A	ENSG00000268047
1645	386.557378428305	1.31109	1.31109	0.390772	0.089673	4.35774	1.3141e-05	0.000147275	ROR1	4919	NTRKR1	ENSG00000185483
1646	7405.42138356518	1.16301	1.16301	0.21786	0.0500304	4.35455	1.3334e-05	0.000149347	MORF4L1	10933	Eaf3	ENSG00000185787
1647	897.997472702164	1.20233	1.20233	0.265832	0.061064	4.35334	1.34079e-05	0.000150084	KCNS3	3790	KV9.3	ENSG00000170745
1648	1239.23449744148	1.18153	1.18153	0.240659	0.0552913	4.35257	1.34554e-05	0.000150524	STX6	10228	STX6	ENSG00000135823
1649	740.303590455716	1.27397	1.27397	0.349326	0.0803418	4.348	1.37384e-05	0.000153436	ADGRA2	25960	GPR124	ENSG00000020181
1650	1578.69935190494	1.18936	1.18936	0.25018	0.0575396	4.34796	1.37407e-05	0.000153436	CEP131	22994	AZ1	ENSG00000141577
1651	936.527492176782	0.829675	1.20529	-0.269381	0.0619551	-4.34801	1.37381e-05	0.000153436	P2RY1	5028	P2Y1	ENSG00000169860
1652	50.1904707052282	0.474028	2.10958	-1.07696	0.247735	-4.3472	1.37886e-05	0.000153878	HNRNPD-DT	101928963	HNRNPD-DT	ENSG00000272677
1653	880.859092524841	0.820193	1.21923	-0.285965	0.0658035	-4.34573	1.38812e-05	0.000154818	ZNF394	84124	ZKSCAN14	ENSG00000160908
1654	131.397661727294	1.51994	1.51994	0.604018	0.139106	4.34213	1.4111e-05	0.000157198	FKBP1A	2280	FKBP-12	ENSG00000088832
1655	4473.73809828225	1.11128	1.11128	0.152218	0.0350562	4.34212	1.41117e-05	0.000157198	SLC16A1	6566	HHF7	ENSG00000155380
1656	13.6441062457303	0.249916	4.00134	-2.00048	0.460751	-4.34179	1.41325e-05	0.000157266	#N/A	#N/A	#N/A	ENSG00000263033
1657	89.825518967491	0.603716	1.65641	-0.728058	0.167687	-4.34176	1.41348e-05	0.000157266	PTOV1-AS1	100506033	PTOV1-AS1	ENSG00000268006
1658	1218.12590125006	1.25667	1.25667	0.329603	0.07597	4.33859	1.43401e-05	0.000159453	C1QL1	10882	C1QRF	ENSG00000131094
1659	1110.97607571013	0.807536	1.23833	-0.308401	0.0710871	-4.33835	1.43557e-05	0.00015953	CRTC1	23373	MAML2	ENSG00000105662
1660	1872.95167162751	0.856484	1.16756	-0.223501	0.0515297	-4.33733	1.44223e-05	0.000160174	FANCL	55120	FAAP43	ENSG00000115392
1661	299.678310699798	0.72367	1.38184	-0.466596	0.10761	-4.33601	1.45095e-05	0.000161046	#N/A	#N/A	#N/A	ENSG00000239213
1662	5747.20941433051	1.18624	1.18624	0.246393	0.0568276	4.3358	1.45234e-05	0.000161103	NAXE	128240	AIBP	ENSG00000163382
1663	36.7191160115077	0.453662	2.20429	-1.14031	0.263023	-4.3354	1.45493e-05	0.000161294	ZNF350-AS1	101669766	HCCAT3	ENSG00000269235
1664	5726.63494305275	1.17929	1.17929	0.237913	0.0549192	4.33206	1.47723e-05	0.000163668	CD151	977	EBS7	ENSG00000177697
1665	2381.45261386766	1.20299	1.20299	0.266622	0.0615731	4.33017	1.48997e-05	0.000164979	SMARCB1	6598	BAF47	ENSG00000099956
1666	875.020771567789	0.825765	1.211	-0.276196	0.0638011	-4.32902	1.49774e-05	0.00016574	TCEANC2	127428	C1orf83	ENSG00000116205
1667	56.9382607094385	1.82615	1.82615	0.868807	0.200731	4.32821	1.50325e-05	0.00016625	NUCB1-AS1	100874085	NUCB1-AS1	ENSG00000235191
1668	1432.5101025502	1.18129	1.18129	0.240358	0.0555374	4.32785	1.50569e-05	0.00016642	LRRC41	10489	MUF1	ENSG00000132128
1669	2755.6804327385	0.854735	1.16995	-0.226451	0.0523305	-4.32732	1.50936e-05	0.000166725	DHX29	54505	DDX29	ENSG00000067248
1670	1806.87703156176	0.857284	1.16648	-0.222156	0.0513423	-4.32695	1.51187e-05	0.000166903	ZBTB5	9925	ZBTB5	ENSG00000168795
1671	58.4792978585048	0.538134	1.85827	-0.893964	0.206707	-4.32479	1.5268e-05	0.000168451	HYI-AS1	100873923	HYI-AS1	ENSG00000229348
1672	3041.13170828424	1.13621	1.13621	0.184231	0.0426105	4.3236	1.53505e-05	0.000169163	NOMO1	23420	Nomo	ENSG00000103512
1673	417.950536834866	0.787683	1.26955	-0.344314	0.079636	-4.32359	1.53509e-05	0.000169163	TTC6	319089	C14orf25	ENSG00000139865
1674	1392.99816093844	0.851498	1.1744	-0.231925	0.0536445	-4.32337	1.53662e-05	0.000169166	ZNF302	55900	HSD16	ENSG00000089335
1675	1054.6056750596	1.18095	1.18095	0.239948	0.0555008	4.32332	1.53695e-05	0.000169166	SNAI3-AS1	197187	SNAI3-AS1	ENSG00000260630
1676	2722.70655710903	1.14695	1.14695	0.197802	0.0457711	4.32155	1.54935e-05	0.000170429	TMEM69	51249	C1orf154	ENSG00000159596
1677	145.804369064876	0.686795	1.45604	-0.542048	0.125555	-4.31722	1.58007e-05	0.000173704	SKIDA1	387640	C10orf140	ENSG00000180592
1678	6157.20403557297	0.890605	1.12283	-0.167142	0.0387307	-4.31549	1.59246e-05	0.000174962	SKP2	6502	FBL1	ENSG00000145604
1679	12.4672492316472	4.2562	4.2562	2.08957	0.484578	4.31213	1.61689e-05	0.00017754	#N/A	#N/A	#N/A	ENSG00000230432
1680	9709.97496254791	1.10695	1.10695	0.146584	0.0339945	4.31199	1.61792e-05	0.000177547	CRTAP	10491	CASP	ENSG00000170275
1681	889.179462575923	0.826447	1.21	-0.275006	0.0637802	-4.31177	1.61951e-05	0.000177616	#N/A	#N/A	#N/A	ENSG00000291203
1682	19017.8922048665	1.12402	1.12402	0.168661	0.0391275	4.31056	1.6284e-05	0.000178485	PEG10	23089	EDR	ENSG00000242265
1683	2426.07134247107	1.1796	1.1796	0.238294	0.0552843	4.31033	1.63013e-05	0.000178569	ZNF768	79724	ZNF768	ENSG00000169957
1684	307.678755339241	1.33176	1.33176	0.413339	0.0959097	4.30967	1.63498e-05	0.000178993	#N/A	#N/A	#N/A	ENSG00000266978
1685	623.760015966743	0.798856	1.25179	-0.323993	0.0751946	-4.30872	1.64202e-05	0.000179657	SOCS2-AS1	144481	SOCS2-AS1	ENSG00000246985
1686	18761.6851623121	1.11228	1.11228	0.153523	0.0356596	4.30523	1.66814e-05	0.000182299	RPN2	6185	RIBIIR	ENSG00000118705
1687	117.504277522662	0.656602	1.52299	-0.606909	0.140969	-4.30527	1.66779e-05	0.000182299	#N/A	#N/A	#N/A	ENSG00000243176
1688	134.492937114899	0.631631	1.5832	-0.662846	0.153984	-4.30464	1.67256e-05	0.000182674	#N/A	#N/A	#N/A	ENSG00000186481
1689	5333.56595743156	0.896388	1.11559	-0.157805	0.0366688	-4.30352	1.68104e-05	0.000183491	PABPC4	8761	APP-1	ENSG00000090621
1690	870.898742926134	0.82897	1.20632	-0.270609	0.0628878	-4.30304	1.68469e-05	0.000183781	NHLRC3	387921	NHLRC3	ENSG00000188811
1691	24.6187301691866	0.38763	2.57978	-1.36725	0.317871	-4.30127	1.69821e-05	0.000185036	HEY1	23462	BHLHb31	ENSG00000164683
1692	20.1428808018633	0.320475	3.12037	-1.64172	0.381676	-4.30133	1.69773e-05	0.000185036	#N/A	#N/A	#N/A	ENSG00000270020
1693	527.098118581111	0.810277	1.23415	-0.303513	0.0705929	-4.29948	1.712e-05	0.000186429	KANSL1L	151050	C2orf67	ENSG00000144445
1694	11501.6690248228	1.16021	1.16021	0.214384	0.0498874	4.29736	1.72844e-05	0.000188108	NME4	4833	NDPK-D	ENSG00000103202
1695	16259.5212760631	1.09281	1.09281	0.128042	0.0298101	4.29526	1.74491e-05	0.000189788	MYOF	26509	FER1L3	ENSG00000138119
1696	111.967821517135	0.649098	1.5406	-0.623493	0.145199	-4.29405	1.75443e-05	0.000190712	KIF23-AS1	145694	KIF23-AS1	ENSG00000259426
1697	21005.2517896216	1.16247	1.16247	0.217197	0.0506329	4.28964	1.78961e-05	0.000194421	FDPS	2224	FPPS	ENSG00000160752
1698	1362.12911812261	0.863326	1.15831	-0.212022	0.04943	-4.28934	1.79209e-05	0.000194575	PARP6	56965	ARTD17	ENSG00000137817
1699	397.361881207641	1.35015	1.35015	0.433118	0.100989	4.28877	1.79662e-05	0.000194759	EFNA3	1944	EFL2	ENSG00000143590
1700	62.0519575511011	0.552074	1.81135	-0.857067	0.199832	-4.28894	1.79527e-05	0.000194759	#N/A	#N/A	#N/A	ENSG00000262877
1701	566.649392189767	0.772136	1.29511	-0.373073	0.086989	-4.28873	1.79695e-05	0.000194759	#N/A	#N/A	#N/A	ENSG00000290928
1702	511.804539870044	0.795121	1.25767	-0.330753	0.0771418	-4.2876	1.80614e-05	0.00019564	IDUA	3425	IDA	ENSG00000127415
1703	318.863759870485	0.765637	1.3061	-0.385267	0.089958	-4.28275	1.84598e-05	0.000199839	ZNF586	54807	ZNF586	ENSG00000083828
1704	129.834863993226	1.56558	1.56558	0.646694	0.151035	4.28175	1.85426e-05	0.000200617	TMEM121	80757	TMEM121A	ENSG00000184986
1705	992.317018321549	0.836486	1.19548	-0.257587	0.0601638	-4.28143	1.85698e-05	0.000200793	PDE7A	5150	HCP1	ENSG00000205268
1706	932.580647643556	1.20288	1.20288	0.266491	0.0622457	4.28127	1.85826e-05	0.000200814	NOC4L	79050	NET49	ENSG00000184967
1707	751.068055458279	1.27935	1.27935	0.355412	0.0830757	4.27817	1.8844e-05	0.000203401	ADPRS	54936	ADPRHL2	ENSG00000116863
1708	767.223226974537	1.29845	1.29845	0.376789	0.0880705	4.27827	1.88353e-05	0.000203401	ITGB4	3691	CD104	ENSG00000132470
1709	6218.13102137336	0.88667	1.12782	-0.173531	0.0405638	-4.27799	1.88592e-05	0.000203445	FUBP1	8880	FBP	ENSG00000162613
1710	8012.18840657655	1.16743	1.16743	0.223338	0.0522117	4.27755	1.8896e-05	0.000203613	RAB1A	5861	RAB1	ENSG00000138069
1711	15366.703132022	1.13383	1.13383	0.181207	0.0423624	4.27754	1.88968e-05	0.000203613	PIP5K1A	8394	PIP5K1A	ENSG00000143398
1712	1124.25093768177	0.832943	1.20056	-0.26371	0.0616553	-4.27717	1.89283e-05	0.000203833	RANBP17	64901	RANBP17	ENSG00000204764
1713	4018.82197659313	1.12574	1.12574	0.170877	0.0399719	4.27492	1.91207e-05	0.000205785	ZDHHC20	253832	4933421L13Rik	ENSG00000180776
1714	10495.4867809677	1.0961	1.0961	0.132385	0.0309767	4.2737	1.92254e-05	0.000206791	TM9SF3	56889	EP70-P-iso	ENSG00000077147
1715	4203.54298419922	0.887437	1.12684	-0.172283	0.0403257	-4.27228	1.93481e-05	0.00020799	SPATS2	65244	Nbla00526	ENSG00000123352
1716	13449.5337143963	1.1679	1.1679	0.223919	0.0524182	4.27178	1.93921e-05	0.000208341	ANP32E	81611	LANP-L	ENSG00000143401
1717	1970.43072079576	0.871082	1.148	-0.199119	0.0466303	-4.27018	1.95317e-05	0.000209719	PMS1	5378	HNPCC3	ENSG00000064933
1718	631.698235633413	1.20712	1.20712	0.271571	0.0636335	4.26773	1.97469e-05	0.000211905	ZSCAN21	7589	NY-REN-21	ENSG00000166529
1719	2540.97259372628	1.16643	1.16643	0.222102	0.0520471	4.26733	1.97828e-05	0.000212167	ARL1	400	ARFL1	ENSG00000120805
1720	322.287078028692	1.31374	1.31374	0.393677	0.0922942	4.26546	1.99489e-05	0.000213824	RHOU	58480	ARHU	ENSG00000116574
1721	3299.03233806907	0.889166	1.12465	-0.169475	0.0397418	-4.26439	2.00447e-05	0.000214726	DDHD2	23259	SAMWD1	ENSG00000085788
1722	1320.74709956225	1.17782	1.17782	0.236118	0.0553724	4.26418	2.00636e-05	0.000214804	RAC3	5881	RAC3	ENSG00000169750
1723	1438.89997784712	0.837268	1.19436	-0.256238	0.0601215	-4.262	2.02604e-05	0.000216786	LIG4	3981	LIG4S	ENSG00000174405
1724	1118.14590399044	0.827487	1.20848	-0.273191	0.0641048	-4.26163	2.02942e-05	0.000217021	MLKL	197259	hMLKL	ENSG00000168404
1725	314.436092040658	1.39885	1.39885	0.484241	0.113656	4.2606	2.03875e-05	0.000217892	FUOM	282969	C10orf125	ENSG00000148803
1726	809.531079184555	1.26174	1.26174	0.335411	0.0787478	4.25931	2.05058e-05	0.00021903	UQCC3	790955	C11orf83	ENSG00000204922
1727	183.082435693962	0.676095	1.47908	-0.564702	0.132591	-4.25897	2.05367e-05	0.000219232	#N/A	#N/A	#N/A	ENSG00000266086
1728	2346.02317130325	1.14996	1.14996	0.20158	0.0473433	4.25783	2.06418e-05	0.000220227	RNF126	55658	RNF126	ENSG00000070423
1729	63.3562636894347	0.525017	1.9047	-0.929564	0.218372	-4.25679	2.07383e-05	0.000220746	TNFRSF13C	115650	BAFF-R	ENSG00000159958
1730	672.273622899659	0.805344	1.24171	-0.312323	0.0733665	-4.25703	2.07163e-05	0.000220746	CYP2R1	120227	CYP2R1	ENSG00000186104
1731	998.87488953527	1.20237	1.20237	0.265884	0.0624607	4.25683	2.0735e-05	0.000220746	SELENOM	140606	SELM	ENSG00000198832
1732	52.8506836755623	0.518948	1.92698	-0.946338	0.222306	-4.25691	2.07268e-05	0.000220746	#N/A	#N/A	#N/A	ENSG00000293482
1733	684.617218652675	1.24944	1.24944	0.321281	0.0754773	4.25665	2.07511e-05	0.000220754	FRAS1	80144	FRASRS1	ENSG00000138759
1734	1186.61626367036	0.860137	1.16261	-0.217362	0.0510667	-4.25644	2.07707e-05	0.000220836	ABCA7	10347	ABCA-SSN	ENSG00000064687
1735	1950.79866473062	1.18501	1.18501	0.244895	0.0575519	4.25519	2.0887e-05	0.000221944	NBDY	550643	LINC01420	ENSG00000204272
1736	1499.0984222409	1.18294	1.18294	0.242371	0.0569734	4.2541	2.09889e-05	0.000222642	LNPK	80856	KIAA1715	ENSG00000144320
1737	2891.2633444968	1.17252	1.17252	0.229613	0.0539743	4.25411	2.09881e-05	0.000222642	ZMAT2	153527	Ptg-12	ENSG00000146007
1738	60.4460219018106	0.547055	1.82797	-0.870242	0.204557	-4.25429	2.09717e-05	0.000222642	#N/A	#N/A	#N/A	ENSG00000270127
1739	52.9160118836748	0.374848	2.66775	-1.41562	0.332822	-4.25339	2.10555e-05	0.000223219	#N/A	#N/A	#N/A	ENSG00000255236
1740	1459.83682249241	1.20539	1.20539	0.2695	0.0633797	4.25215	2.11724e-05	0.00022433	ASMTL	8623	ASMTLX	ENSG00000169093
1741	238.674834580381	1.48996	1.48996	0.575273	0.135294	4.25202	2.11852e-05	0.000224336	IFI27L2	83982	FAM14A	ENSG00000119632
1742	2034.74167497895	0.88049	1.13573	-0.183621	0.0432085	-4.24966	2.14099e-05	0.000226586	MAPK8	5599	JNK	ENSG00000107643
1743	5648.29997769406	1.13059	1.13059	0.177073	0.041672	4.24921	2.14525e-05	0.000226907	SLC44A2	57153	CTL2	ENSG00000129353
1744	62.1142805791309	0.52036	1.92175	-0.942419	0.221848	-4.24805	2.1564e-05	0.000227956	LOC124906119	124906119	LOC124906119	ENSG00000288898
1745	1204.21823924143	0.847636	1.17975	-0.238484	0.0561503	-4.24725	2.16414e-05	0.000228599	SS18L1	26039	CREST	ENSG00000184402
1746	735.679221567772	1.2138	1.2138	0.279529	0.0658169	4.24708	2.16578e-05	0.000228599	CD302	9936	BIMLEC	ENSG00000241399
1747	428.414864182367	0.757578	1.32	-0.400534	0.0943092	-4.24703	2.16621e-05	0.000228599	#N/A	#N/A	#N/A	ENSG00000246695
1748	287.268004345286	0.75435	1.32565	-0.406695	0.0957883	-4.24577	2.17843e-05	0.000229757	FAM227B	196951	C15orf33	ENSG00000166262
1749	374.841618680948	1.27338	1.27338	0.348658	0.0821299	4.2452	2.184e-05	0.000230213	FUCA1	2517	FUCA	ENSG00000179163
1750	747.499561338201	0.81504	1.22693	-0.295056	0.0695058	-4.24506	2.18534e-05	0.000230222	GATD1-DT	171391	NS3BP	ENSG00000255284
1751	4760.39380570116	1.10625	1.10625	0.145684	0.0343256	4.24418	2.19396e-05	0.000230998	USP25	29761	USP21	ENSG00000155313
1752	805.731244488478	0.798352	1.25258	-0.324904	0.0765937	-4.24191	2.21629e-05	0.000233216	MIB2	142678	ZZANK1	ENSG00000197530
1753	377.440026894813	0.778948	1.28378	-0.360401	0.084967	-4.24166	2.21874e-05	0.000233342	ZNF888	388559	ZNF888	ENSG00000213793
1754	64.0573832614768	0.553702	1.80602	-0.852817	0.201079	-4.2412	2.22328e-05	0.000233686	#N/A	#N/A	#N/A	ENSG00000228862
1755	11659.7777225601	1.20541	1.20541	0.26952	0.0635512	4.241	2.2253e-05	0.000233765	RPL18	6141	DBA18	ENSG00000063177
1756	145.812851157679	0.684064	1.46185	-0.547796	0.129174	-4.24076	2.22763e-05	0.000233876	LRRC8C-DT	400761	LRRC8C-DT	ENSG00000231999
1757	80.0566249610875	0.591006	1.69203	-0.758756	0.178939	-4.2403	2.23217e-05	0.000234219	#N/A	#N/A	#N/A	ENSG00000280239
1758	406.082988844322	0.790256	1.26541	-0.339608	0.0801075	-4.23941	2.24107e-05	0.000235019	ZNF333	84449	ZNF333	ENSG00000160961
1759	87.182390606828	0.572331	1.74724	-0.805079	0.19003	-4.2366	2.26932e-05	0.000237847	LOC105370532	105370532	LOC105370532	ENSG00000274015
1760	185.261790429388	0.62185	1.6081	-0.685362	0.161839	-4.23484	2.28719e-05	0.000239584	COL1A1	1277	CAFYD	ENSG00000108821
1761	3884.60365715191	0.851223	1.17478	-0.23239	0.0548924	-4.23356	2.3002e-05	0.000240779	MAVS	57506	CARDIF	ENSG00000088888
1762	3595.54468653547	1.1202	1.1202	0.16375	0.03868	4.23346	2.30122e-05	0.000240779	ARMCX2	9823	ALEX2	ENSG00000184867
1763	1495.69054329435	0.849412	1.17728	-0.235463	0.0556257	-4.233	2.30599e-05	0.000241142	ENO3	2027	GSD13	ENSG00000108515
1764	5460.89788646967	1.12606	1.12606	0.171288	0.0404869	4.2307	2.32963e-05	0.000243337	SEC63	11231	DNAJC23	ENSG00000025796
1765	355.613185912181	0.755846	1.32302	-0.403835	0.0954515	-4.23079	2.32872e-05	0.000243337	FOXP4-AS1	101060264	FOXP4-AS1	ENSG00000234753
1766	308.684529443423	1.42567	1.42567	0.511644	0.120969	4.22956	2.34144e-05	0.000244373	CXCL8	3576	GCP-1	ENSG00000169429
1767	4670.16750617495	1.1048	1.1048	0.143783	0.0339952	4.22949	2.34219e-05	0.000244373	DENND5A	23258	DEE49	ENSG00000184014
1768	2580.25018113231	0.883275	1.13215	-0.179065	0.0423613	-4.22709	2.36735e-05	0.000246858	SPG7	6687	CAR	ENSG00000197912
1769	9466.65778623084	1.13913	1.13913	0.187931	0.0444857	4.22453	2.39445e-05	0.000249542	CD63	967	AD1	ENSG00000135404
1770	580.853735060751	0.817805	1.22279	-0.290172	0.0686939	-4.22413	2.39867e-05	0.000249841	SCAMP1-AS1	728769	SCAMP1-AS1	ENSG00000245556
1771	4886.02431922729	1.12189	1.12189	0.165927	0.0392891	4.22324	2.40813e-05	0.000250685	AKR1A1	10327	ALDR1	ENSG00000117448
1772	3516.87016711732	0.885255	1.12962	-0.175835	0.0416417	-4.22257	2.41535e-05	0.000251295	GPD2	2820	GDH2	ENSG00000115159
1773	234.589507650245	1.35201	1.35201	0.435111	0.10306	4.22191	2.42236e-05	0.000251882	MME	4311	CALLA	ENSG00000196549
1774	3117.87965605177	0.872915	1.14559	-0.196087	0.0464478	-4.22167	2.42503e-05	0.000252017	DONSON	29980	B17	ENSG00000159147
1775	2557.53257700863	1.13938	1.13938	0.188252	0.0445946	4.22141	2.42783e-05	0.000252166	XYLT2	64132	PXYLT2	ENSG00000015532
1776	668.294074103625	0.731595	1.36688	-0.450883	0.106856	-4.21955	2.44792e-05	0.00025411	UGDH-AS1	100885776	UGDH-AS1	ENSG00000249348
1777	3460.98912967808	0.862093	1.15997	-0.214085	0.0507544	-4.21805	2.46426e-05	0.000255661	SACS	26278	ARSACS	ENSG00000151835
1778	981.637842305116	0.833447	1.19984	-0.262837	0.0623148	-4.21789	2.46598e-05	0.000255696	ZNF667-AS1	100128252	MORT	ENSG00000166770
1779	4183.28327470551	0.893342	1.11939	-0.162716	0.0385879	-4.21677	2.4783e-05	0.00025683	PTAR1	375743	PTAR1	ENSG00000188647
1780	3192.68355135982	1.25997	1.25997	0.333388	0.0790651	4.21663	2.47985e-05	0.000256846	LGALS1	3956	GAL1	ENSG00000100097
1781	1531.88805759092	0.861428	1.16086	-0.215198	0.0510478	-4.21561	2.49107e-05	0.000257862	ADM2	79924	AM2	ENSG00000128165
1782	1453.46861864435	0.854784	1.16989	-0.226369	0.0537039	-4.21513	2.49638e-05	0.000258267	MED21	9412	SRB7	ENSG00000152944
1783	125.22853235417	0.672054	1.48798	-0.573351	0.136027	-4.21499	2.49792e-05	0.000258282	LINC00937	389634	LINC00937	ENSG00000226091
1784	1220.12542834355	0.835575	1.19678	-0.259159	0.0614923	-4.2145	2.50327e-05	0.00025869	DNASE1	1773	DNL1	ENSG00000213918
1785	41.5811287426758	0.484862	2.06244	-1.04435	0.247956	-4.21185	2.53287e-05	0.000261603	#N/A	#N/A	#N/A	ENSG00000289410
1786	590.694981233063	0.775511	1.28947	-0.366781	0.0870971	-4.21118	2.54042e-05	0.000262235	DOC2A	8448	Doc2	ENSG00000149927
1787	34.8219663532617	0.430354	2.32367	-1.2164	0.288873	-4.21085	2.54408e-05	0.000262466	#N/A	#N/A	#N/A	ENSG00000224950
1788	316.534557099176	1.32015	1.32015	0.4007	0.0951817	4.20984	2.55552e-05	0.000263499	RAC2	5880	EN-7	ENSG00000128340
1789	5867.23783859223	1.11231	1.11231	0.153557	0.0364817	4.20915	2.56328e-05	0.000263776	PHF20	51230	C20orf104	ENSG00000025293
1790	3639.45852411686	1.13677	1.13677	0.184935	0.0439369	4.2091	2.56394e-05	0.000263776	C5orf22	55322	C5orf22	ENSG00000082213
1791	9266.4565927068	1.15358	1.15358	0.206124	0.048969	4.20927	2.56201e-05	0.000263776	PSIP1	11168	DFS70	ENSG00000164985
1792	13294.1970235408	1.14664	1.14664	0.197415	0.0469003	4.20924	2.56227e-05	0.000263776	UBB	7314	HEL-S-50	ENSG00000170315
1793	1867.4208959546	1.17003	1.17003	0.226541	0.0538348	4.20808	2.57555e-05	0.000264823	ATF3	467	ATF3	ENSG00000162772
1794	30.1576702633596	0.433963	2.30434	-1.20436	0.286292	-4.20674	2.59078e-05	0.000266241	SPDYA	245711	RINGO3	ENSG00000163806
1795	854.899176726248	0.821383	1.21746	-0.283872	0.0674927	-4.20597	2.59969e-05	0.000267008	AMOT	154796	AMOT	ENSG00000126016
1796	2828.14782023173	1.12897	1.12897	0.175009	0.0416192	4.205	2.61087e-05	0.000268006	TMEM50A	23585	IFNRC	ENSG00000183726
1797	417.92666805439	0.774498	1.29116	-0.368667	0.0876969	-4.20388	2.62376e-05	0.00026918	MAP3K7CL	56911	C21orf7	ENSG00000156265
1798	6009.1725476612	1.12501	1.12501	0.169935	0.0404314	4.20303	2.6336e-05	0.000269953	GORASP2	26003	GOLPH6	ENSG00000115806
1799	1830.46651168002	0.847801	1.17952	-0.238202	0.0566746	-4.20298	2.63422e-05	0.000269953	AP5Z1	9907	KIAA0415	ENSG00000242802
1800	25.2703501417006	0.360824	2.77143	-1.47063	0.349913	-4.20285	2.63581e-05	0.000269965	DNAH12	201625	DHC3	ENSG00000174844
1801	22.0114875045523	0.34254	2.91936	-1.54565	0.368065	-4.1994	2.67622e-05	0.000273952	#N/A	#N/A	#N/A	ENSG00000269318
1802	1074.87480722744	0.838478	1.19264	-0.254156	0.0605302	-4.19883	2.68302e-05	0.000274496	TET3	200424	BEFAHRS	ENSG00000187605
1803	1806.09701330345	1.13865	1.13865	0.187328	0.0446254	4.19779	2.69528e-05	0.000275415	PLXND1	23129	CHTD9	ENSG00000004399
1804	261.17785850709	0.757415	1.32028	-0.400844	0.0954913	-4.1977	2.69641e-05	0.000275415	RFXAP	5994	RFXAP	ENSG00000133111
1805	23.4921973620482	0.342043	2.92361	-1.54775	0.368714	-4.19769	2.69649e-05	0.000275415	CPEB1-AS1	283692	CPEB1-AS1	ENSG00000259462
1806	9101.92798678463	1.20375	1.20375	0.267539	0.0637611	4.19597	2.71709e-05	0.000277366	RPS3A	6189	FTE1	ENSG00000145425
1807	351.054106589266	1.30523	1.30523	0.384299	0.0916128	4.19482	2.73094e-05	0.00027862	ZNF25	219749	KOX19	ENSG00000175395
1808	260.740861795344	0.678507	1.47382	-0.559565	0.133398	-4.19469	2.7324e-05	0.00027862	#N/A	#N/A	#N/A	ENSG00000291283
1809	9952.56575978259	1.11232	1.11232	0.153571	0.0366174	4.19393	2.74162e-05	0.000279406	RTN3	10313	ASYIP	ENSG00000133318
1810	1307.64661916617	1.18505	1.18505	0.244949	0.0584443	4.19116	2.77535e-05	0.000282687	B3GNT2	10678	3-Gn-T1	ENSG00000170340
1811	795.89448872899	1.19693	1.19693	0.259342	0.0618809	4.19099	2.77744e-05	0.000282744	RPL23AP42	647099	RPL23A_13_431	ENSG00000234851
1812	46.3779126944895	0.525837	1.90173	-0.927312	0.221312	-4.19007	2.78862e-05	0.000283726	SPART-AS1	100507135	C13orf43	ENSG00000120664
1813	471.76968948337	0.761495	1.31321	-0.393094	0.0938435	-4.18883	2.80401e-05	0.000285134	PHF7	51533	HSPC045	ENSG00000010318
1814	2314.00634310374	1.12685	1.12685	0.17229	0.0411325	4.18865	2.80621e-05	0.0002852	ZDHHC3	51304	DHHC-3	ENSG00000163812
1815	289.849579487486	0.670718	1.49094	-0.576221	0.137597	-4.18773	2.81759e-05	0.000286199	SLC6A16	28968	NT5	ENSG00000063127
1816	881.080326280797	1.2162	1.2162	0.282385	0.067439	4.18726	2.82339e-05	0.00028663	MED11	400569	HSPC296	ENSG00000161920
1817	58.5877624121792	0.528992	1.89039	-0.918682	0.219425	-4.18676	2.8296e-05	0.000287103	#N/A	#N/A	#N/A	ENSG00000271862
1818	6552.66074250735	1.11572	1.11572	0.157981	0.0377438	4.18561	2.84406e-05	0.00028841	EIF3L	51386	EIF3EIP	ENSG00000100129
1819	4267.49628584717	1.15847	1.15847	0.212223	0.0507075	4.18524	2.8486e-05	0.000288713	PREB	10113	SEC12	ENSG00000138073
1820	833.463239201199	0.844458	1.18419	-0.243902	0.0582993	-4.18362	2.86908e-05	0.000290629	CCDC18	343099	NY-SAR-41	ENSG00000122483
1821	182.866230567843	1.47193	1.47193	0.557713	0.133314	4.18345	2.87119e-05	0.000290683	LOXL4	84171	LOXC	ENSG00000138131
1822	440.088104043311	0.787635	1.26962	-0.344401	0.08236	-4.18165	2.89402e-05	0.000292833	SNAP25	6616	CMS18	ENSG00000132639
1823	1440.59870157897	0.862973	1.15879	-0.212613	0.0508483	-4.18132	2.89819e-05	0.000293094	GFOD2	81577	GFOD2	ENSG00000141098
1824	420.287782609221	1.27061	1.27061	0.345523	0.0826469	4.18072	2.9059e-05	0.000293712	WNT7B	7477	WNT7B	ENSG00000188064
1825	5578.89765809603	0.88625	1.12835	-0.174215	0.0416989	-4.17791	2.94194e-05	0.000297192	CLCN7	1186	CLC-7	ENSG00000103249
1826	962.358748694908	0.85069	1.17552	-0.233295	0.0558426	-4.17772	2.94441e-05	0.000297279	DNAJC24	120526	DPH4	ENSG00000170946
1827	7178.96117170512	1.10318	1.10318	0.141668	0.0339115	4.17758	2.94633e-05	0.00029731	GTF2F1	2962	BTF4	ENSG00000125651
1828	303.879908615507	1.32302	1.32302	0.403837	0.0967428	4.17433	2.98858e-05	0.000301408	METRNL	284207	METRNL	ENSG00000176845
1829	106.62334175142	0.615332	1.62514	-0.700562	0.167832	-4.1742	2.99041e-05	0.000301428	#N/A	#N/A	#N/A	ENSG00000287431
1830	109.348112302917	0.605885	1.65048	-0.722885	0.173256	-4.17236	3.01459e-05	0.0003037	#N/A	#N/A	#N/A	ENSG00000259539
1831	1706.01958481105	0.870824	1.14834	-0.199548	0.04783	-4.17202	3.01909e-05	0.000303821	DTX3	196403	RNF154	ENSG00000178498
1832	335.348447706663	0.760531	1.31487	-0.394922	0.0946591	-4.17204	3.0188e-05	0.000303821	LINC02245	400958	LINC02245	ENSG00000237638
1833	3053.1717905249	1.14678	1.14678	0.197585	0.0473651	4.17153	3.02555e-05	0.000304305	SETD3	84193	C14orf154	ENSG00000183576
1834	735.429655683847	1.20512	1.20512	0.26918	0.0645332	4.17119	3.03017e-05	0.000304603	CRYBB2P1	1416	CRYB2B	ENSG00000291087
1835	165.321817753852	0.654998	1.52672	-0.610438	0.146375	-4.17038	3.04091e-05	0.000305516	#N/A	#N/A	#N/A	ENSG00000262526
1836	978.557255825578	0.833647	1.19955	-0.262492	0.0629534	-4.16962	3.05102e-05	0.000306365	EOGT	285203	AER61	ENSG00000163378
1837	7158.2900455338	1.12893	1.12893	0.174958	0.0419665	4.16899	3.05955e-05	0.000307055	SIGMAR1	10280	ALS16	ENSG00000147955
1838	1154.88674004508	1.17925	1.17925	0.237866	0.0570699	4.16797	3.07326e-05	0.000308262	GPRIN1	114787	GRIN1	ENSG00000169258
1839	883.396957907464	0.82255	1.21573	-0.281825	0.0676582	-4.16541	3.10789e-05	0.000311566	ANK2	287	ANK-2	ENSG00000145362
1840	3607.55459960254	0.877508	1.13959	-0.188516	0.0452641	-4.1648	3.1162e-05	0.00031223	PROSER1	80209	C13orf23	ENSG00000120685
1841	1895.82050562364	0.869964	1.14947	-0.200972	0.0482712	-4.1634	3.13546e-05	0.000313819	ATP10D	57205	ATPVD	ENSG00000145246
1842	358.415308296996	0.721712	1.38559	-0.470505	0.113007	-4.16351	3.13397e-05	0.000313819	RBM14-RBM4	100526737	COAZ	ENSG00000248643
1843	981.775219977099	1.1758	1.1758	0.233645	0.0561232	4.16307	3.13996e-05	0.000314098	ZNF185	7739	SCELL	ENSG00000147394
1844	6304.05550935529	1.18069	1.18069	0.239633	0.0575706	4.16241	3.14907e-05	0.000314838	SUMF2	25870	pFGE	ENSG00000129103
1845	25909.2651609096	1.10236	1.10236	0.14059	0.0337862	4.16117	3.16626e-05	0.000316385	BLTP2	9703	BCOX	ENSG00000007202
1846	3699.85439583147	1.15139	1.15139	0.203377	0.048902	4.15885	3.19847e-05	0.000319431	CCDC124	115098	Lso2	ENSG00000007080
1847	196.547257444715	0.674537	1.4825	-0.568031	0.136603	-4.15825	3.20691e-05	0.000320101	#N/A	#N/A	#N/A	ENSG00000224903
1848	11.6830394611639	0.246557	4.05586	-2.02001	0.485845	-4.15772	3.21441e-05	0.000320676	LRRN4CL	221091	LRRN4CL	ENSG00000177363
1849	20.061832490748	0.237698	4.20703	-2.0728	0.498574	-4.15746	3.21802e-05	0.000320863	LOC124909384	124909384	LOC124909384	ENSG00000286952
1850	38.9388633277597	2.04884	2.04884	1.0348	0.248938	4.15688	3.22619e-05	0.000321503	CLDN10	9071	CPETRL3	ENSG00000134873
1851	468.538779748845	0.776661	1.28756	-0.364644	0.0877425	-4.15584	3.24095e-05	0.000322799	TRMT13	54482	CCDC76	ENSG00000122435
1852	1948.61191238305	1.15388	1.15388	0.206496	0.0496986	4.15496	3.25346e-05	0.00032387	CYTH3	9265	ARNO3	ENSG00000008256
1853	28512.7129606147	1.13522	1.13522	0.182967	0.0440393	4.15463	3.2582e-05	0.000324167	HNRNPUL1	11100	E1B-AP5	ENSG00000105323
1854	1049.79737390643	1.1635	1.1635	0.218474	0.0525962	4.1538	3.26998e-05	0.000325164	ARFGAP3	26286	ARFGAP1	ENSG00000242247
1855	15.4197574489952	0.309247	3.23366	-1.69317	0.407858	-4.15136	3.30509e-05	0.000328478	LINC02367	101930452	LINC02367	ENSG00000260423
1856	1850.86506907937	0.880607	1.13558	-0.183429	0.0442048	-4.14953	3.33161e-05	0.000330935	INTS9	55756	CPSF2L	ENSG00000104299
1857	3827.21097012857	0.875076	1.14276	-0.192519	0.0464025	-4.1489	3.34082e-05	0.000331671	POLE	5426	CRCS12	ENSG00000177084
1858	2457.25623635309	1.25289	1.25289	0.325264	0.0784022	4.14866	3.34428e-05	0.000331836	SELENOT	51714	SELT	ENSG00000198843
1859	374.764920154815	0.770353	1.29811	-0.376408	0.0907403	-4.14819	3.35117e-05	0.000332341	PIF1	80119	C15orf20	ENSG00000140451
1860	107.487577819404	0.659691	1.51586	-0.600137	0.144679	-4.14805	3.35317e-05	0.000332361	ATP2A1	487	ATP2A	ENSG00000196296
1861	67.5642762655958	0.569684	1.75536	-0.811766	0.195719	-4.1476	3.35975e-05	0.000332834	C20orf204	284739	LINC00176	ENSG00000196421
1862	2740.57314517744	1.11898	1.11898	0.162189	0.0391089	4.14711	3.36698e-05	0.000333371	RCOR1	23186	COREST	ENSG00000089902
1863	2831.93510963725	1.17286	1.17286	0.230026	0.0554701	4.14684	3.37097e-05	0.000333408	C7orf50	84310	YCR016W	ENSG00000146540
1864	91.4056553894493	0.640578	1.56109	-0.642555	0.15495	-4.14685	3.37077e-05	0.000333408	ZNF66	7617	ZNF66P	ENSG00000160229
1865	277.987088538495	0.766352	1.30488	-0.383921	0.0926057	-4.14576	3.3869e-05	0.000334804	PGBD4	161779	PGBD4	ENSG00000182405
1866	330.804421748309	1.41278	1.41278	0.498533	0.120271	4.14507	3.39716e-05	0.000335638	MMP14	4323	MMP-14	ENSG00000157227
1867	60.8154027334319	1.76702	1.76702	0.821321	0.198271	4.14241	3.43674e-05	0.000339367	CFAP46	54777	C10orf123	ENSG00000171811
1868	3734.18180180338	1.2201	1.2201	0.287001	0.069316	4.14048	3.46579e-05	0.000342052	BZW2	28969	5MP1	ENSG00000136261
1869	75.2227402078301	0.498976	2.00411	-1.00296	0.242349	-4.13849	3.49601e-05	0.00034485	CAPN10-DT	101752400	CAPN10-AS1	ENSG00000260942
1870	45.0503897920052	0.47365	2.11126	-1.07811	0.260655	-4.13614	3.53193e-05	0.000348207	C5AR1	728	C5A	ENSG00000197405
1871	742.11143874192	1.22065	1.22065	0.287655	0.0695573	4.13551	3.54163e-05	0.00034879	ZFAT	57623	AITD3	ENSG00000066827
1872	4486.91165294615	1.21204	1.21204	0.277436	0.0670854	4.13556	3.54082e-05	0.00034879	AMD1	262	ADOMETDC	ENSG00000123505
1873	257.60979708162	0.753943	1.32636	-0.407473	0.0985478	-4.13478	3.55299e-05	0.000349722	GPNMB	10457	HGFIN	ENSG00000136235
1874	1230.74796038889	0.838886	1.19206	-0.253453	0.0613376	-4.13209	3.59475e-05	0.000353644	SLC36A1	206358	Dct1	ENSG00000123643
1875	1154.75032344003	0.830189	1.20454	-0.268488	0.065005	-4.13027	3.62341e-05	0.000356273	ZNF320	162967	ZFPL	ENSG00000182986
1876	31.2882525150712	0.445192	2.24622	-1.1675	0.282809	-4.12823	3.65559e-05	0.000359245	#N/A	#N/A	#N/A	ENSG00000258311
1877	2614.52967671988	1.13085	1.13085	0.177413	0.0429863	4.12719	3.6722e-05	0.000360686	NMT2	9397	NMT2	ENSG00000152465
1878	566.932685191995	0.807968	1.23767	-0.30763	0.0745422	-4.12693	3.67642e-05	0.000360765	PARP9	83666	ARTD9	ENSG00000138496
1879	28.5118077423695	0.416548	2.40068	-1.26344	0.306149	-4.1269	3.67692e-05	0.000360765	#N/A	#N/A	#N/A	ENSG00000273058
1880	2094.21929757721	1.19087	1.19087	0.252019	0.0610961	4.12497	3.70786e-05	0.000363607	ARHGAP29	9411	PARG1	ENSG00000137962
1881	5135.12099406313	1.11659	1.11659	0.1591	0.0385807	4.12381	3.7265e-05	0.000365241	RNPEP	6051	AP-B	ENSG00000176393
1882	1497.88549002684	1.165	1.165	0.220336	0.0534362	4.12334	3.73426e-05	0.000365806	PHRF1	57661	PPP1R125	ENSG00000070047
1883	305.60805018821	0.683374	1.46333	-0.549252	0.133218	-4.12298	3.7401e-05	0.000366184	ANKRD29	147463	ANKRD29	ENSG00000154065
1884	13271.5984078497	0.882417	1.13325	-0.180467	0.0437897	-4.12123	3.76862e-05	0.000368781	ATXN2L	11273	A2D	ENSG00000168488
1885	51.0387102762111	0.524869	1.90524	-0.92997	0.22574	-4.11965	3.79448e-05	0.000371115	DND1	373863	RBMS4	ENSG00000256453
1886	60.5161642595059	0.543064	1.8414	-0.880805	0.213838	-4.11904	3.8046e-05	0.000371907	ZNF493	284443	ZNF493	ENSG00000196268
1887	580.183614721493	0.816742	1.22438	-0.292048	0.0709141	-4.11834	3.81619e-05	0.000372842	ZNF761	388561	ZNF468	ENSG00000160336
1888	381.034689790488	1.26516	1.26516	0.339322	0.0824163	4.11717	3.83555e-05	0.000374535	MEGF6	1953	EGFL3	ENSG00000162591
1889	6137.21111403225	1.12432	1.12432	0.169052	0.041065	4.11669	3.84354e-05	0.000375116	PRRC1	133619	PRRC1	ENSG00000164244
1890	3099.27437095255	0.883517	1.13184	-0.17867	0.0434087	-4.116	3.85509e-05	0.000375647	XRCC3	7517	CMM6	ENSG00000126215
1891	995.130028820731	1.32254	1.32254	0.40331	0.097984	4.11608	3.85369e-05	0.000375647	MUC3A	4584	MUC-3A	ENSG00000169894
1892	3137.76077200348	1.14223	1.14223	0.191855	0.0466099	4.1162	3.85174e-05	0.000375647	PPP1R2	5504	IPP-2	ENSG00000184203
1893	1100.45223744026	1.18232	1.18232	0.241625	0.0587263	4.11442	3.88153e-05	0.000378024	HECTD3	79654	HECTD3	ENSG00000126107
1894	73.2630834622146	0.587355	1.70255	-0.767696	0.186644	-4.11316	3.90279e-05	0.000379894	#N/A	#N/A	#N/A	ENSG00000293332
1895	637.673583901934	1.21412	1.21412	0.279915	0.068064	4.11253	3.91343e-05	0.000380728	TPD52L1	7164	D53	ENSG00000111907
1896	1582.05325322631	0.832399	1.20135	-0.264653	0.0643842	-4.11053	3.94754e-05	0.000383667	MAP3K10	4294	MEKK10	ENSG00000130758
1897	1081.95539822463	0.839358	1.19139	-0.252641	0.0614622	-4.11051	3.9478e-05	0.000383667	PRDM15	63977	C21orf83	ENSG00000141956
1898	2445.4391424692	1.13192	1.13192	0.178769	0.0435034	4.10932	3.96833e-05	0.00038546	GGCX	2677	VKCFD1	ENSG00000115486
1899	882.016806707551	1.18011	1.18011	0.238923	0.058159	4.10809	3.98945e-05	0.000387306	TOM1	10043	IMD85	ENSG00000100284
1900	22.3348237556773	0.384899	2.59809	-1.37745	0.33541	-4.10676	4.0124e-05	0.000389329	#N/A	#N/A	#N/A	ENSG00000260345
1901	1539.24532916285	1.17735	1.17735	0.235546	0.0573611	4.10637	4.01925e-05	0.000389789	MRPL40	64976	L40mt	ENSG00000185608
1902	1113.47749272707	0.858493	1.16483	-0.220122	0.0536161	-4.10552	4.03403e-05	0.000391017	PSMG4	389362	C6orf86	ENSG00000180822
1903	22648.8105311571	1.09808	1.09808	0.134977	0.0328797	4.10519	4.03978e-05	0.000391368	MAP4	4134	MAP4	ENSG00000047849
1904	429.787059448377	1.25613	1.25613	0.328984	0.0801581	4.10419	4.05742e-05	0.000392871	RPH3AL	9501	NOC2	ENSG00000181031
1905	862.268524177221	0.838576	1.1925	-0.253986	0.0619053	-4.10282	4.0815e-05	0.000394995	MATCAP2	23366	KIAA0895	ENSG00000164542
1906	965.393638137257	0.822567	1.21571	-0.281795	0.0687048	-4.10154	4.1041e-05	0.000396973	MCRIP2	84331	C16orf14	ENSG00000172366
1907	2465.2120036468	0.866554	1.154	-0.206638	0.0503874	-4.10098	4.11405e-05	0.000397727	TRAF4	9618	CART1	ENSG00000076604
1908	115.670749625486	0.632344	1.58142	-0.661219	0.161278	-4.09986	4.13402e-05	0.000399449	#N/A	#N/A	#N/A	ENSG00000272104
1909	28.2915222973945	0.37575	2.66134	-1.41216	0.344485	-4.09932	4.14362e-05	0.000400167	#N/A	#N/A	#N/A	ENSG00000237276
1910	3355.54845426978	0.874761	1.14317	-0.193039	0.0470975	-4.0987	4.15474e-05	0.00040103	KLC2	64837	KLC2	ENSG00000174996
1911	1449.75009272171	0.86835	1.15161	-0.203651	0.0496936	-4.09814	4.16489e-05	0.0004018	CAMLG	819	CAML	ENSG00000164615
1912	5544.18157675073	0.853084	1.17222	-0.229241	0.0559577	-4.09668	4.19123e-05	0.000404129	NCOA6	23054	AIB3	ENSG00000198646
1913	1699.70522952989	1.19204	1.19204	0.253437	0.0618679	4.09641	4.19599e-05	0.000404377	RRAGA	10670	FIP-1	ENSG00000155876
1914	350.324180555929	0.789759	1.26621	-0.340515	0.0832059	-4.09244	4.26856e-05	0.000411155	INKA2	55924	C1orf183	ENSG00000197852
1915	1444.23818000756	1.2018	1.2018	0.265192	0.0648095	4.09187	4.27899e-05	0.000411945	CYB5A	1528	CYB5	ENSG00000166347
1916	9963.10593110814	1.11939	1.11939	0.162707	0.0397647	4.09175	4.28127e-05	0.000411949	PRKAA1	5562	AMPK	ENSG00000132356
1917	4064.7671203322	1.11092	1.11092	0.151753	0.0370907	4.09139	4.28801e-05	0.000412383	OPTN	10133	ALS12	ENSG00000123240
1918	164.498822790216	0.66748	1.49817	-0.583203	0.142552	-4.09118	4.2919e-05	0.000412542	#N/A	#N/A	#N/A	ENSG00000272305
1919	4354.80731859127	1.1125	1.1125	0.153811	0.0376382	4.08658	4.37786e-05	0.000420585	EMB	133418	GP70	ENSG00000170571
1920	9761.58077358816	1.15766	1.15766	0.211213	0.0516892	4.08622	4.38462e-05	0.000421015	DDOST	1650	AGER1	ENSG00000244038
1921	371.817869361269	0.75253	1.32885	-0.410179	0.100397	-4.08556	4.39711e-05	0.000421995	GPRC5D-AS1	100506314	GPRC5D-AS1	ENSG00000247498
1922	210.35743587875	0.708586	1.41126	-0.496984	0.12165	-4.08536	4.4008e-05	0.000422128	LOC100996660	100996660	LOC100996660	ENSG00000267248
1923	381.32763055859	0.796933	1.25481	-0.32747	0.0801669	-4.08485	4.41053e-05	0.000422842	MELTF-AS1	100507057	MFI2-AS1	ENSG00000228109
1924	152.976004297502	0.693278	1.44242	-0.528494	0.129405	-4.08402	4.42625e-05	0.000424129	STPG3-AS1	100129722	C9orf173-AS1	ENSG00000275549
1925	2924.85691678329	1.23201	1.23201	0.301009	0.07372	4.08314	4.44319e-05	0.00042553	LY6E	4061	RIG-E	ENSG00000160932
1926	9113.56730233324	1.18449	1.18449	0.244269	0.0598264	4.08297	4.4464e-05	0.000425617	RPS26	6231	DBA10	ENSG00000197728
1927	591.843269189806	0.823686	1.21405	-0.279833	0.0685531	-4.08199	4.46509e-05	0.000427184	HELQ	113510	HEL308	ENSG00000163312
1928	1087.97090253267	0.857101	1.16672	-0.222463	0.0545169	-4.08061	4.49168e-05	0.000429283	ANKRD13C	81573	dJ677H15.3	ENSG00000118454
1929	19394.2410133565	1.17519	1.17519	0.23289	0.057071	4.08071	4.4898e-05	0.000429283	RPL29	6159	HIP	ENSG00000162244
1930	226.425560024546	0.747861	1.33715	-0.419158	0.102744	-4.07962	4.5109e-05	0.000430896	G0S2	50486	G0S2	ENSG00000123689
1931	93.875137706903	0.648552	1.5419	-0.624705	0.153139	-4.07933	4.51662e-05	0.00043102	STK31	56164	SGK396	ENSG00000196335
1932	344.291365900942	0.766852	1.30403	-0.38298	0.0938833	-4.07931	4.51687e-05	0.00043102	#N/A	#N/A	#N/A	ENSG00000290548
1933	2740.79753334386	1.12956	1.12956	0.175755	0.0430991	4.07792	4.54395e-05	0.000433379	TEX2	55852	HT008	ENSG00000136478
1934	3191.30178585723	1.15762	1.15762	0.211164	0.0517868	4.07756	4.55115e-05	0.000433841	LPCAT1	79888	AGPAT10	ENSG00000153395
1935	2324.5587841011	1.21653	1.21653	0.282772	0.0693529	4.07729	4.55628e-05	0.000434106	SEC61G	23480	SSS1	ENSG00000132432
1936	110.321618466654	0.611233	1.63604	-0.710205	0.174232	-4.0762	4.57772e-05	0.000435924	#N/A	#N/A	#N/A	ENSG00000226823
1937	3069.64755210685	1.13797	1.13797	0.186457	0.0457633	4.07438	4.61377e-05	0.00043913	NAPG	8774	GAMMASNAP	ENSG00000134265
1938	3586.02773853562	0.895667	1.11649	-0.158966	0.0390198	-4.07398	4.62155e-05	0.000439417	STK38	11329	NDR	ENSG00000112079
1939	166.328083778962	0.682787	1.46459	-0.550493	0.135123	-4.07401	4.62103e-05	0.000439417	WDR97	340390	KIAA1875	ENSG00000179698
1940	663.571316745794	1.19924	1.19924	0.262124	0.0643613	4.0727	4.64722e-05	0.000441402	SNX32	254122	SNX6B	ENSG00000172803
1941	2330.64262211032	1.19104	1.19104	0.252226	0.0619298	4.07278	4.64547e-05	0.000441402	GADD45GIP1	90480	CKBBP2	ENSG00000179271
1942	236.516375328297	0.714419	1.39974	-0.485157	0.11913	-4.07251	4.65087e-05	0.000441522	#N/A	#N/A	#N/A	ENSG00000228506
1943	665.389675341957	0.781385	1.27978	-0.355894	0.0874796	-4.06831	4.73544e-05	0.000449318	ANKRD13C-DT	11147	HHLA3	ENSG00000197568
1944	65366.0915609437	1.11552	1.11552	0.157712	0.0387683	4.06805	4.74083e-05	0.000449598	PKM	5315	CTHBP	ENSG00000067225
1945	260.468656035335	1.34117	1.34117	0.423491	0.104133	4.06683	4.7656e-05	0.000451715	BCAN	63827	BEHAB	ENSG00000132692
1946	1392.69246830917	1.18871	1.18871	0.249396	0.0613338	4.06621	4.77832e-05	0.000452688	CTSF	8722	CATSF	ENSG00000174080
1947	541.025599153727	1.3121	1.3121	0.391873	0.0964143	4.06447	4.81412e-05	0.000455845	SLC22A17	51310	24p3R	ENSG00000092096
1948	2186.48212400593	1.15192	1.15192	0.204043	0.0502253	4.06255	4.8539e-05	0.000459376	PI4K2B	55300	PI4KIIB	ENSG00000038210
1949	263.950895379508	1.31583	1.31583	0.395972	0.0974808	4.06205	4.86436e-05	0.00046013	CDH3	1001	CDHP	ENSG00000062038
1950	1833.41735495772	0.853089	1.17221	-0.229232	0.0564398	-4.06153	4.87514e-05	0.000460913	CENPK	64105	AF5alpha	ENSG00000123219
1951	3522.75185677289	1.12202	1.12202	0.166092	0.0409074	4.0602	4.90306e-05	0.000463315	MRPL19	9801	L15mt	ENSG00000115364
1952	99.1126644636534	0.629728	1.58799	-0.667199	0.164338	-4.05993	4.9087e-05	0.00046361	TMEM202-AS1	105370888	TMEM202-AS1	ENSG00000261423
1953	1618.96225104242	1.16686	1.16686	0.222632	0.0548466	4.05917	4.92477e-05	0.00046489	DMTN	2039	DMT	ENSG00000158856
1954	837.21250386711	0.825712	1.21108	-0.276289	0.0680717	-4.0588	4.93252e-05	0.000465146	YAE1	57002	C7orf36	ENSG00000241127
1955	63.1630539448598	0.584365	1.71126	-0.775058	0.190953	-4.0589	4.93053e-05	0.000465146	LOC105369850	105369850	LOC105369850	ENSG00000257526
1956	801.063292031611	1.36445	1.36445	0.448323	0.110472	4.05826	4.94387e-05	0.000465978	C19orf33	64073	H2RSP	ENSG00000167644
1957	4912.6861873224	1.14933	1.14933	0.200799	0.0494923	4.05718	4.96694e-05	0.000467912	SLC29A1	2030	AUG	ENSG00000112759
1958	1200.71438282979	1.2973	1.2973	0.375515	0.092569	4.05659	4.97942e-05	0.000468848	OLFML2A	169611	PRO34319	ENSG00000185585
1959	780.376113261176	0.836346	1.19568	-0.257828	0.0635683	-4.05592	4.99366e-05	0.00046995	TSNARE1	203062	TSNARE1	ENSG00000171045
1960	83.2199601964905	1.621	1.621	0.696887	0.171884	4.05439	5.02649e-05	0.000472797	NEFH	4744	CMT2CC	ENSG00000100285
1961	6690.75158845814	1.17588	1.17588	0.233745	0.0576783	4.05257	5.06588e-05	0.00047626	SUMO3	6612	SMT3A	ENSG00000184900
1962	2513.56615974663	0.880868	1.13524	-0.183002	0.0451591	-4.05238	5.06989e-05	0.000476394	ABCC5	10057	ABC33	ENSG00000114770
1963	1471.3855602633	0.843942	1.18492	-0.244785	0.0604259	-4.05098	5.10025e-05	0.000479002	ZNF195	7748	HRF1	ENSG00000005801
1964	101.207658055965	0.608168	1.64428	-0.717459	0.177131	-4.05044	5.11222e-05	0.000479882	MIR3677HG	106660606	MIR3677HG	ENSG00000260778
1965	2504.18573921917	0.869696	1.14983	-0.201416	0.0497363	-4.04968	5.12872e-05	0.000481187	ZNF76	7629	D6S229E	ENSG00000065029
1966	99.2333356772365	0.613276	1.63059	-0.705392	0.174214	-4.04899	5.14394e-05	0.000482323	LINC00173	100287569	NCRNA00173	ENSG00000196668
1967	257.301246896296	0.699849	1.42888	-0.514884	0.127167	-4.04889	5.14607e-05	0.000482323	#N/A	#N/A	#N/A	ENSG00000273329
1968	2143.35434961231	1.20451	1.20451	0.268444	0.0663062	4.04855	5.15357e-05	0.00048278	IFFO2	126917	IFFO2	ENSG00000169991
1969	1455.36100376782	1.19984	1.19984	0.262837	0.0649353	4.04768	5.17282e-05	0.000484338	MYRF	745	11orf9	ENSG00000124920
1970	566.075817922068	0.766171	1.30519	-0.384263	0.0949615	-4.04651	5.19873e-05	0.000486517	MCEE	84693	GLOD2	ENSG00000124370
1971	1726.8189337618	0.87182	1.14703	-0.197897	0.0489194	-4.04538	5.22394e-05	0.000488628	CHEK2	11200	CDS1	ENSG00000183765
1972	249.805854733321	0.740743	1.35	-0.432955	0.107031	-4.04515	5.22906e-05	0.000488858	APOLD1	81575	VERGE	ENSG00000178878
1973	6494.72702841121	1.0998	1.0998	0.137237	0.0339284	4.04491	5.23435e-05	0.000489106	SLC44A1	23446	CD92	ENSG00000070214
1974	497.656825621751	1.26858	1.26858	0.343219	0.084913	4.042	5.29973e-05	0.000494964	VIL1	7429	D2S1471	ENSG00000127831
1975	4052.43212345473	1.11578	1.11578	0.158046	0.0391036	4.04174	5.30569e-05	0.00049527	NECTIN2	5819	CD112	ENSG00000130202
1976	645.803306855236	1.21084	1.21084	0.276008	0.0682983	4.04122	5.31749e-05	0.000495869	PKP3	11187	PKP3	ENSG00000184363
1977	40.0034631847205	0.456136	2.19233	-1.13247	0.280228	-4.04123	5.31719e-05	0.000495869	LARP4B-DT	101927762	LARP4B-DT	ENSG00000229869
1978	613.554145566706	1.21535	1.21535	0.28137	0.0696449	4.04007	5.34352e-05	0.000498044	POC1B	282809	CORD20	ENSG00000139323
1979	81.3064167800133	0.610776	1.63726	-0.711284	0.176094	-4.03923	5.36261e-05	0.000499571	MADCAM1	8174	MACAM1	ENSG00000099866
1980	282.272183404965	1.33941	1.33941	0.421596	0.104382	4.03896	5.3688e-05	0.000499895	PYCR3	65263	PYCRL	ENSG00000104524
1981	12993.5221056515	1.1536	1.1536	0.206141	0.0510409	4.03873	5.37416e-05	0.000500142	SSR3	6747	TRAPG	ENSG00000114850
1982	4236.66980030332	1.12401	1.12401	0.16866	0.0417955	4.03535	5.45199e-05	0.000507129	PIAS3	10401	ZMIZ5	ENSG00000131788
1983	963.456685927568	0.847566	1.17985	-0.238602	0.0591304	-4.03519	5.45579e-05	0.000507226	CARS2	79587	COXPD27	ENSG00000134905
1984	1943.3207547674	0.871733	1.14714	-0.198042	0.0490949	-4.03385	5.48702e-05	0.000509873	SCYL2	55681	AMC4	ENSG00000136021
1985	324.873240460601	0.74404	1.34401	-0.426548	0.105746	-4.03372	5.49014e-05	0.000509906	ZNF790-AS1	284408	ZNF790-AS1	ENSG00000267254
1986	335.423497591963	1.30292	1.30292	0.381746	0.0946483	4.03331	5.49974e-05	0.00051054	HACD4	401494	PTPLAD2	ENSG00000188921
1987	11144.7555510452	1.13748	1.13748	0.185836	0.046078	4.03308	5.50514e-05	0.000510784	GLG1	2734	CFR-1	ENSG00000090863
1988	120.873207760545	0.641645	1.55849	-0.640152	0.158732	-4.03291	5.509e-05	0.000510885	LOC105371824	105371824	LOC105371824	ENSG00000250286
1989	41.6368694172544	0.51937	1.92541	-0.945165	0.234459	-4.03126	5.54789e-05	0.000514233	YPEL3-DT	101928595	YPEL3-DT	ENSG00000250616
1990	1078.30276607143	0.836682	1.1952	-0.257249	0.0638329	-4.03004	5.57678e-05	0.0005163	SLC25A35	399512	SLC25A35	ENSG00000125434
1991	14862.3753548626	1.12783	1.12783	0.173556	0.043066	4.03	5.57769e-05	0.0005163	VDAC1	7416	PORIN	ENSG00000213585
1992	116.474061534321	0.645593	1.54896	-0.631304	0.156652	-4.02996	5.57859e-05	0.0005163	#N/A	#N/A	#N/A	ENSG00000251279
1993	3878.80188141313	0.879652	1.13681	-0.184995	0.0459066	-4.0298	5.58232e-05	0.000516386	UBE2B	7320	E2-17kDa	ENSG00000119048
1994	1418.11121727414	0.833605	1.19961	-0.262564	0.0651583	-4.02963	5.58642e-05	0.000516506	STXBP4	252983	Synip	ENSG00000166263
1995	6520.09829312281	1.17328	1.17328	0.230553	0.0572198	4.02925	5.59547e-05	0.000517083	UQCRC1	7384	D3S3191	ENSG00000010256
1996	5797.80412997583	1.10394	1.10394	0.142662	0.0354185	4.0279	5.62783e-05	0.000519041	UBXN6	80700	UBXD1	ENSG00000167671
1997	240.396931552691	0.706247	1.41593	-0.501755	0.124566	-4.02803	5.62461e-05	0.000519041	HTR1F	3355	5-HT-1F	ENSG00000179097
1998	586.528848202337	0.809478	1.23536	-0.304937	0.0757062	-4.02789	5.62792e-05	0.000519041	GABBR1	2550	GABABR1	ENSG00000204681
1999	102.014532831714	0.638358	1.56652	-0.647562	0.160759	-4.02815	5.62182e-05	0.000519041	#N/A	#N/A	#N/A	ENSG00000257379
[truncated: 3,160 more rows]
